# Supplementary material for: Quantitative investigation of inappropriate regression model construction and the importance of medical statistics experts in observational medical research: a cross-sectional study
Source: PubMed Central journal article supplement — BMJ Open. 2018 May 5;8(5):e021129. doi: 10.1136/bmjopen-2017-021129 (PMC5942431; doi:10.1136/bmjopen-2017-021129), 2018-05-05
Supplement: bmjopen-2017-021129.draft_revisions.pdf [file bmjopen-2017-021129.draft_revisions.pdf]

# BMJ Open

BMJ Open is committed to open peer review. As part of this commitment we make the peer review history of every article we publish publicly available.

When an article is published we post the peer reviewers' comments and the authors' responses online. We also post the versions of the paper that were used during peer review. These are the versions that the peer review comments apply to.

The versions of the paper that follow are the versions that were submitted during the peer review process. They are not the versions of record or the final published versions. They should not be cited or distributed as the published version of this manuscript.

BMJ Open is an open access journal and the full, final, typeset and author-corrected version of record of the manuscript is available on our site with no access controls, subscription charges or pay-per-view fees (<http://bmjopen.bmj.com>).

If you have any questions on BMJ Open's open peer review process please email [info.bmjopen@bmj.com](mailto:info.bmjopen@bmj.com)

# BMJ Open

## **A quantitative investigation of inappropriate use of multivariate analysis and the importance of medical statistics experts in observational medical research: a cross-sectional study**

|                               |                                                                                                                                                                                                                                                                                                                                                       |
|-------------------------------|-------------------------------------------------------------------------------------------------------------------------------------------------------------------------------------------------------------------------------------------------------------------------------------------------------------------------------------------------------|
| Journal:                      | <i>BMJ Open</i>                                                                                                                                                                                                                                                                                                                                       |
| Manuscript ID                 | bmjopen-2017-021129                                                                                                                                                                                                                                                                                                                                   |
| Article Type:                 | Research                                                                                                                                                                                                                                                                                                                                              |
| Date Submitted by the Author: | 14-Dec-2017                                                                                                                                                                                                                                                                                                                                           |
| Complete List of Authors:     | Nojima, Masanori; the Institute of Medical Science, the University of Tokyo, Center for Translational Research<br>Tokunaga, Mutsumi; the Institute of Medical Science, the University of Tokyo, Center for Translational Research<br>Nagamura, Fumitaka; the Institute of Medical Science, the University of Tokyo, Center for Translational Research |
| Keywords:                     | multivariate analysis, medical statistics, biostatistics, Epidemiology < TROPICAL MEDICINE, clinical research, observational research                                                                                                                                                                                                                 |
|                               |                                                                                                                                                                                                                                                                                                                                                       |

SCHOLARONE™  
Manuscripts

Peer Review Only

1  
2  
3  
4  
5 A quantitative investigation of inappropriate use of multivariate analysis and the  
6 importance of medical statistics experts in observational medical research: a  
7 cross-sectional study  
8  
9

10 Masanori Nojima<sup>1,2</sup>, Mutsumi Tokunaga<sup>1,3</sup>, Fumitaka Nagamura<sup>1,2</sup>

11  
12 1. Center for Translational Research, the Institute of Medical Science, the University of  
13 Tokyo

14  
15 2. The Division of Advanced Medicine Promotion, the Institute of Medical Science, the  
16 University of Tokyo

17  
18 3. Department of Health and Social Behavior, the University of Tokyo, School of Public  
19 Health  
20

21  
22 **Corresponding Author**

23 Masanori Nojima

24  
25 Center for Translational Research / The Division of Advanced Medicine Promotion, the  
26 Institute of Medical Science, the University of Tokyo

27  
28 TEL: +81-6409-2340

29  
30 Email: nojima@ims.u-tokyo.ac.jp  
31  
32  
33  
34  
35  
36  
37  
38  
39  
40  
41  
42  
43  
44  
45  
46  
47  
48  
49  
50  
51  
52  
53  
54  
55  
56  
57  
58  
59  
60

## Abstract

Objective: To investigate under what circumstances inappropriate use of multivariate analysis is likely to occur and to identify the population that needs more support with medical statistics.

Study Design and Settings: The frequency of the inappropriate use of multivariate analysis and related-factors were investigated in observational medical research publications.

Results: Using only variables that were significant in univariate analysis, an inappropriate algorithm was estimated to occur at 6.4% (95%CI: 4.8-8.5%). This was observed in 1.1% of the publications with a medical statistics expert (hereinafter “expert”) as the first author, 3.5% if an expert was included as co-author, and in 12.2% if experts were not involved. In the publications where the number of cases was 50 or less and the study did not include experts, inappropriate algorithm usage was observed with a high proportion of 20.2%. The odds ratio of the involvement of experts for this outcome was 0.28 (95%CI: 0.15-0.53). The involvement of experts and the implementation of unfavorable multivariate analysis are associated at the nation-level analysis ( $R = -0.652$ ).

Conclusion: Based on the results of this study, the benefit of participation of medical statistics experts is obvious. Experts should be involved for proper confounding adjustment and interpretation of statistical models.

## Keywords

multivariate analysis; medical statistics; biostatistics; epidemiology; clinical research; observational research

## Strengths and limitations of this study

### *Strengths*

- In studies where the number of events is small and medical statistics experts do not participate as co-authors, inappropriate multivariate analysis is often used, and sensitivity analysis by creating multiple models has not been conducted. Also in the country level investigation, the association between absence of experts and inappropriate multivariate analysis was remarkable. Even with various confounding factors adjustments, participation of experts was inversely correlated with inappropriate use of multivariate analysis.
- This is a unique research that quantitatively investigated the frequency and the

factors leading to inappropriate use of algorithms in variable selection of multivariate analysis. We also evaluated the quantitative efficacy of the involvement of medical statistics expert. As a result, the importance of experts' participation in medical research became clear.

- It is desirable to establish a statistical support system for researchers who have limited or no access to medical statistics experts.

### ***Limitations***

- Since the definition of outcome is complicated, there are many possibilities of misclassification. Therefore, the reliability may be higher in the examination of the relative difference rather than absolute values. In addition, the number of factors related to the quality of multivariate analysis are far more than those examined in this study.
- Even papers classified under the undesirable outcome this time may not always be inappropriate as multivariate analysis. For example, when the purpose of multivariate analysis is to construct a predictive model, there is no problem if a model with high predictive power is finally created. Our outcomes should be considered as potential inappropriate/desirable use of multivariate analysis.

### **1. Introduction**

In the medical research field, "multivariate analysis" (some claim that it should be called "multivariable analysis"), typified by logistic regression or Cox regression, is widely used as a means of controlling confounding in observational research and creating a prognostic prediction model [1]. As statistical analysis software became widely used, multivariate analysis also became familiar to many medical researchers and clinicians. Although multivariate analysis is easily executed using software, understanding the statistical assumptions that constitute the premise of multivariate analysis and interpretation of the statistical model are very difficult for researchers who do not specialize in biostatistics. Consequently, it is concerning that multivariate analysis could become part of the "black box of statistics." Moreover, common misconceptions have been formed among medical researchers who are not specialized in statistics, which can interfere with correct understanding and interpretation of the results.

An American medical journal, "Annals of Internal Medicine"

1  
2  
3  
4  
5 (http://annals.org/aim/pages/AuthorInformationStatisticsOnly) describes its  
6 representative example as general statistical guidance on their website.  
7  
8

9  
10 “Approaches that select factors for inclusion in a multivariable model only if the factors  
11 are ‘statistically significant’ in ‘bivariate screening’ are not optimal. A factor can be a  
12 confounder even if it is not statistically significant by itself because it changes the effect  
13 of the exposure of interest when it is included in the model, or because it is a confounder  
14 only when included with other covariates. ... Better strategies than P value driven  
15 approaches for selecting variables are those that use external clinical judgment.”  
16  
17

18  
19 The problem with the algorithm in the first sentence of previous quotation has already  
20 been pointed out many times [1-3]. In Kenneth J. Rothman’s “Epidemiology: An  
21 Introduction” [4], the author said, “The two primary ones (purpose) being to make  
22 predictions and to control for confounding.” This algorithm ignores the true associated  
23 factor whose apparent association is weakened by confounding in univariate analysis,  
24 which is not reasonable for any purpose. However, although it is just personal  
25 experience as statistical consultant, we receive many questions like, “Only variables  
26 that were significant in univariate analysis are included in multivariate analysis,  
27 right?”  
28  
29  
30  
31  
32

33  
34 Knowing in what situations such inappropriate analysis is being done should lead to  
35 improvement in the quality of statistical analysis in medical research. However, there  
36 are no reports that summarize how multivariate analysis is carried out, including  
37 whether medical statistical experts are involved or not.  
38  
39

40  
41 Based on the above situation, we decided to investigate under what circumstances  
42 inappropriate use is likely to occur and to identify the population that needs more  
43 support. Since inappropriate use of multivariate analysis (particularly in variable  
44 selection) is found even in published papers, we investigated its frequency and related  
45 factors in publications. Considering the feasibility, time constraints, and difficulty in the  
46 survey, we examined the following items as outcomes: 1) using only variables that were  
47 significant in univariate analysis, 2) using too many explanatory variables for few  
48 events. Additionally, as a desirable multivariate analysis method, we also investigated  
49 whether multiple models were created for the same outcome / factor relation as an  
50 outcome.  
51  
52  
53  
54  
55  
56  
57  
58  
59  
60

1  
2  
3  
4  
5 Many other things should be considered in multivariate analysis such as association of  
6 events with variables, premises on distribution of variables, and correlation between  
7 explanatory variables. Therefore, knowledge of both medical science and biostatistics is  
8 necessary to enable appropriate understanding of statistical models. We therefore  
9 assessed the association between medical statistics expert involvement (such as  
10 biostatistician and epidemiologist) and the outcomes. Based on this research, we found  
11 a high-risk population in the implementation of multivariate analysis and suggest  
12 improvement measures.  
13  
14  
15  
16  
17

## 18 **2. Materials and methods**

### 19 **2.1. Selection of applicable journals and publications**

20 This study was conducted as a cross-sectional study. Here, target publications in this  
21 study are about medical research undertaking multivariate analysis. To target  
22 publications with various qualities and properties, a multistep sampling method was  
23 applied as described below. Briefly, we first selected scientific journals dealing with  
24 clinical medicine and epidemiology and then we sampled individual publications. Also,  
25 for "multivariate analysis," we chose logistic regression and Cox regression which are  
26 frequently performed in medical research. Details are as follows:  
27  
28  
29

- 30 1) Journals were selected from the journals listed in Thomson Reuter's Journal  
31 Citation Report. We first selected 45 medical research fields including 609 journals  
32 from the list in the website in 2014 ("JCR year" was 2013). Selected research fields  
33 were listed in Supplementary Table 1.  
34
- 35 2) With simple sampling, many journals with a small number of citations could be  
36 selected. Therefore, sampling was stratified by the impact factor which is an  
37 indicator directly reflecting citation frequency. The journals were classified into the  
38 following four layers according to the impact factor: "<2 (less than 2)," "2-<4 (two to  
39 less than 4)," "4-<6 (four to less than 6)," and "6< (more than 6)."  
40
- 41 3) Subsequently, we selected journals whose number of articles exceeds 200 / year to  
42 avoid journals with few articles and extracted all journals with impact factor of 6 or  
43 more (71 journals). The sampling rates of other strata were set to extract the same  
44 number ( $71 \times 4 = 284$  journals, listed in Supplementary Table 2). Sampling rates  
45 according to impact factor were: over 6: 100%, 4-6: < 55.5%, 2-4: < 27.8%, and under  
46 2: 45.8%. Journals selected for the investigation in this study were listed with this  
47 information in Supplementary Table 2.  
48
- 49 4) We searched for publications in which logistic regression / Cox regression was  
50 performed from selected journal in PubMed (within the past 5 years: 2011-2015).  
51  
52  
53  
54  
55  
56  
57  
58  
59  
60

1  
2  
3  
4  
5 The search terms were "logistic + XXXX (journal name)" for logistic regression, and  
6 "hazard + XXXX (journal name)" for Cox regression, respectively. A publication  
7 database with 4086 (for logistic) and 11726 (for Cox) publications was constructed  
8 through the previously described process. Clinical trials were excluded when the  
9 word "random" or "trial" was included in the title or abstract. Meta-analysis was  
10 also excluded when the word "meta-analysis" was included in the title or abstract.  
11 All publications were from journals contracted with the University of Tokyo or open  
12 access articles.  
13

- 14  
15  
16 5) To set the 95% confidence interval to the range of  $\pm 3\%$ , the target number of  
17 publications was 1200. To limit selection bias to choose journals with many  
18 publications with multivariate analysis, the sampling rate was calculated by  
19 applying a power function with an exponent  $< 1$  to the number of publications (for  
20 logistic regression:  $0.34 \cdot N^{0.644}$ , for Cox regression:  $0.54/N^{0.644}$ , N: the number of  
21 publications in each journal).  
22  
23 6) Ineligible publications that could not be excluded by the above steps were excluded  
24 afterwards, and 571 papers (for logistic) and 541 (for Cox) were selected as the  
25 research subject. This number satisfies the target confidence interval set above.  
26  
27  
28  
29

## 30 31 **2.2. Surveillance**

32 The following information was collected from sampled publications by research  
33 assistants with knowledge of statistical analysis: affiliation of authors, country of the  
34 first author, method of variable selection for multivariate analysis (the primary outcome  
35 described below), number of the events (for multivariate analysis, categorized as: -20,  
36 21-50, 51-100, and 101-), number of the covariates (categorized as: -2, 3-5, 6-10, 11-), etc.  
37 We decided whether authors or co-authors have expertise in biostatistics or  
38 epidemiology based on their affiliation. When the affiliation includes the following  
39 terms or related terms: epidemiology, public health, prevention, nutrition, social health,  
40 community health, occupational health, environmental health, population, global  
41 health, nutrition, biostatistics, statistics, mathematics, and clinical research, the author  
42 was considered a medical statistics expert (hereinafter, sometimes simply referred to as  
43 "expert") in this research. Affiliation and the outcomes were independently collected by  
44 different assistants to avoid affecting determination of their association. For  
45 outcome-specific (not research-specific) information such as the number of events and  
46 the number of covariates, basically the information on the primary endpoint was  
47 collected, and if not applicable, information on the multivariate analysis first appearing  
48 in the abstracts or results was collected.  
49  
50  
51  
52  
53  
54  
55  
56  
57  
58  
59  
60



1  
2  
3  
4  
5 Since it was suggested that there are more problems in studies with few events  
6 (the number of events was 100 or less at the preliminary review), validation of the  
7 outcomes by the expert (the first author) was carefully done. In addition, the outcome of  
8 “Creating multiple models for the same outcome / factor relation” was surveyed by the  
9 first author. In this surveillance, for the studies where the number of events exceeds  
10 100, because the number is extremely large, validation was carried out by 30%  
11 sampling.  
12  
13  
14  
15

### 16 **2.3. Outcomes**

17 All outcomes were defined as surrogates for the quality of multivariate analysis. These  
18 should be considered as inappropriate/desirable algorithms.  
19

- 20 1. “Using only variables that were significant in univariate analysis” is the primary  
21 event for this study, which means that all variables screened with statistical  
22 significance in univariate analysis were automatically entered without manual  
23 selection of variables and without consideration for the relevance of variables. This  
24 includes cases when it is written as such in method section or it is obvious that it  
25 was implemented as such from expression of the tables. It is excluded from the  
26 event when variables were manually added or removed due to relevance to outcomes  
27 (such as a factor of interest or an established risk factor) or statistical consideration  
28 (such as multiple collinearity) after the screening in univariate analysis. However, it  
29 is not excluded when the stepwise method such as backward elimination method is  
30 only applied algorithmically for *post hoc* variable selection.  
31
- 32 2. “Using too many explanatory variables for few events” is one of the secondary  
33 outcomes. This outcome was investigated only when the number of events for  
34 individual publication was equal to 50 or less and if the number of covariates was  
35 over 11 when the number of events was equal to 50 or less or the number of  
36 covariates was over 5 when the number of events was equal to 20 or less. The  
37 criteria was basically based on the study from Peduzzi et al. [5, 6], but because  
38 defining the exact number of events and covariates is sometimes very difficult, we  
39 relaxed that criterion; outcomes were taken only when the number of events is less  
40 than 50 and the number of covariates exceeds 20% of the number of events.  
41
- 42 3. “Creating multiple models for the same outcome / factor relation” was determined as  
43 a desirable outcome for multivariate analysis. It was defined as the event only if  
44 tables were included for multiple models (because of screening efficiency). A  
45 representative example of this outcome was a fixed outcome and factors of interest  
46 related to various adjustment of covariates such as “adjustment for age,” “age + sex,”  
47  
48  
49  
50  
51  
52  
53  
54  
55  
56  
57  
58  
59  
60

1  
2  
3  
4  
5 “age + sex + other important factors,” etc. Subgroup analysis and analysis on  
6 different outcomes are not included in this outcome.  
7

8  
9 Of course, there are many other points to be considered in multivariate analysis, such  
10 as multiple collinearity and use of intermediate variables, but these were not included  
11 at this time because it is difficult to gather information from publications from various  
12 research areas.  
13  
14

#### 15 16 **2.4. Statistical analyses**

17 Statistical analyses for binomial outcomes were performed using weighted generalized  
18 estimated equation (distribution = binomial, link = logit) with robust variance. Weight  
19 was basically defined as the inverse of the following formula: sampling rate stratified by  
20 impact factor \* sampling rate based on the number of each journal (investigated /  
21 published). The correlation coefficient weighted by the number of publications was  
22 calculated using a general linear model. All statistical analyses were performed using  
23 SPSS 23 (IBM).  
24  
25  
26  
27

### 28 29 **3. Results**

#### 30 **3.1. Characteristics of investigated publications**

31 The flow chart of the selection of the research subjects is summarized in Figure 1. An  
32 outline of the investigated publications is shown in Table 1 (total number was 1112).  
33 Most of the studies were large-scale research that exceeded 100 events. Publication  
34 whose first author is an expert in medical statistics is estimated to be 33.5% of the total,  
35 and in the remaining 67.7%, the proportion of publications in which an expert was  
36 included in co-authors was estimated to be 37.8%.  
37  
38  
39  
40  
41

#### 42 **3.2. Descriptive statistics of the outcomes**

43 Descriptive statistics of the outcomes are summarized in Table 2. The primary endpoint  
44 of our research, “Using only variables that were significant in univariate analysis” was  
45 estimated to occur in 6.4% (95%CI: 4.8-8.5%) of the overall publications. There was a big  
46 difference depending on whether an expert was the first author or not. It was observed  
47 in only 1.1% of the publications with the involvement of an expert as the first author,  
48 12.2% if experts were not involved, and 3.5% if an expert was included as co-author.  
49 When an expert was included as the first author or co-author, it was 2.1%.  
50 “Using too many explanatory variables for few events” was observed in 17.4% of the  
51 total, 19.0% if the first author is an expert, 22.1% if experts were not involved, and  
52  
53  
54  
55  
56  
57  
58  
59  
60

1  
2  
3  
4  
5 11.5% if an expert was included as co-author. Since these are only for research with few  
6 events, the estimation accuracy was low. When an expert was included as the first  
7 author or co-author, it was 13.6%.

8  
9 Regarding the preferred outcome, "Creating multiple models for the same outcome /  
10 factor relation," like the primary outcome, the result greatly differed depending on  
11 whether the first author was an expert or not. If the first author is an expert, the  
12 preferred outcome was achieved 30.7% of the time. Otherwise, only 7.3% is achieved if  
13 the co-authorship did not contain experts, and 19.0% if an expert was included. In the  
14 case in which an expert was included as the first author or co-author, it was 26.2%. This  
15 outcome does not overlap with the algorithm "using only variables that are significant  
16 in univariate analysis" in which only one model was created basically. As can be seen  
17 from the above results, it was considered that when the authors included an expert,  
18 preferable analysis was carried out more frequently.  
19  
20  
21  
22  
23  
24

### 25 **3.3. Subgroup analysis**

26 Subsequently, the association between the number of events and the impact factor in  
27 each publication and the outcomes were assessed. As shown in Table 3, unfavorable  
28 results are observed in publications with fewer events and in journals with lower impact  
29 factors, independent from involvement of experts. In particular, where the number of  
30 cases was 50 or less and the study did not include experts, inappropriate multivariate  
31 analysis was observed with a high proportion of 20.2%. At the same time, construction  
32 of multiple models was implemented at a low proportion of 2.1%. When the impact  
33 factor is under 2 in studies in which experts were not involved, similar results have  
34 been observed (30.6% for the former, and 4.0% for the latter).  
35  
36  
37  
38  
39

### 40 **3.4. Further analysis for the association between involvement of experts in medical 41 statistics and the quality of multivariate analysis**

42 We assessed the association between the involvement of experts and the outcomes by  
43 adjusting for the two factors stratified above (Table 4). As a result, the odds ratio of the  
44 involvement of experts for "using only variables that are significant in univariate  
45 analysis" was 0.28 (95%CI: 0.15-0.53) which can be interpreted to be a large risk  
46 reduction.  
47  
48  
49

50 If an expert was involved as the first author in the publication, the paper is expected to  
51 be an epidemiological study, and there should be an influence due to the difference in  
52 research characteristics on the result. If the first author is not an expert, the research  
53 could be a non-epidemiological research such as clinical research, and we focused on  
54  
55  
56  
57  
58  
59  
60

1  
2  
3  
4  
5 how much improvement could be seen by involving an expert in these studies. As a  
6 result, even when an expert was involved only as a co-author, the risk decreased with an  
7 odds ratio of 0.42 (95%CI: 0.19-0.97). Likewise, for "Creating multiple models for the  
8 same outcome / factor relation," the result was favorable when an expert was included  
9 (OR 3.51. 95% CI: 1.88-6.58 for as any type of author, OR 2.36 for only as co-author, 95%  
10 CI: 1.03 - 5.38).  
11  
12  
13

### 14 15 **3.5. Nation-level investigation**

16 Finally, we examined how much medical statistics experts are involved as co-authors  
17 when the first author is not an expert and its association with "using only variables that  
18 are significant in univariate analysis" for each country (of the first author).  
19

20 First of all, 45% of all papers are reports from the United States, accounting for an  
21 overwhelming majority compared to other countries (Table 5). As shown in Figure 2, the  
22 correlation coefficients (weighting the number of publications) of "Proportion of  
23 publications with medical statistics experts as co-author within publications in which  
24 the first author is not an expert" with "proportion of publications with multivariate  
25 analysis using only variables that were significant in univariate analysis without  
26 manual selection of variables" showed an inverse correlation with  $R = -0.652$ . In this  
27 analysis, countries with more than 10 publications in which the first author is not an  
28 expert were used. North America and Northern Europe show relatively high expert  
29 involvement proportion, whereas East Asia has a low level of 20% or less except for  
30 Taiwan. For other European countries, there is variability in the result. The  
31 involvement of experts and the implementation of unfavorable multivariate analysis  
32 are associated at the nation-level analysis. The details are summarized in Table 5.  
33  
34  
35  
36  
37  
38  
39

### 40 41 **4. Discussion**

42 In this study, we focused on the algorithm called "use only variables that were  
43 significant in univariate analysis" as the inappropriate outcome which is often  
44 implemented mechanically without considering the influence of confounding and the  
45 relationship between variables. The result of 6.4% for this outcome was less than our  
46 expectation. However, considering that those who consult with us are "clinicians who  
47 conduct small-scale observational research (in Japan)," which was detected as a risk  
48 factor in this research, the research results are consistent with the expectation.  
49  
50  
51  
52

53 The reason why they adopt these methods seems to be based on the following idea.

- 54 - Regarding statistical significance as sacred: it has become a problem in recent years,  
55  
56  
57  
58  
59  
60

1  
2  
3  
4  
5 a statement concerning abuse of P value from American Statistical Association  
6 (ASA) was announced [7].

- 7  
8 - Placing emphasis on being statistically “independent”: some researchers think that  
9 it is totally meaningless unless the factor of interest is associated with their  
10 outcome independently of any existing variable.  
11  
12 - Thinking that not using significant variables in univariate analysis is considered  
13 arbitrary, and using non-significant variables in univariate analysis is also  
14 considered arbitrary.  
15

16  
17  
18 Here, suppose adjuvant chemotherapy for a hypothetical cancer is performed frequently  
19 for cases with lymph node metastasis with strong association with recurrence. Although  
20 this adjuvant chemotherapy has the effect of preventing recurrence, univariate analysis  
21 shows weaker association than actual due to confounding by lymph node metastasis.  
22 However, with appropriate adjustment for lymph node metastasis, a significant inverse  
23 association was observed between the adjuvant chemotherapy with recurrence (example  
24 shown in Supplementary Table 3). If you apply an algorithm of using only variables that  
25 were significant in univariate analysis, the actual effect of adjuvant chemotherapy  
26 would be overlooked. Also, to investigate how confounding occurs in detail, it is  
27 necessary to create multiple models, and stratified analysis are very useful  
28 (Supplementary Table 4).  
29  
30  
31  
32  
33

34  
35 Variable selection is a critical problem in clinical studies with small sample size where  
36 it is unclear which factors should be adjusted. In such situations, variable selection  
37 dependent on P value in univariate analysis might be performed. Even though the  
38 number of covariates that can be entered at the same time is limited due to few events,  
39 a multifaceted approach such as creating multiple models should be helpful for causal  
40 interpretation. This is what we studied as a desirable outcome in this paper. For  
41 example, adjustments are made in multiple steps, such as crude (no adjustment) for  
42 model 1, age + sex for model 2, age + sex + another important factor A for model 3, and  
43 age + sex + another important factor B for model 4. Although this method should be  
44 recommended for studies with few events, there was a trend to omit this step in  
45 publications with fewer events (Table 3). Statistical multiplicity could be a problem with  
46 multiple models, however, we consider that it is not necessarily a severe problem  
47 because results from this approach are not independent and are highly correlated. Such  
48 sensitivity analysis with various statistical approaches is publicly recommended in  
49 clinical trials and analysis with missing data [8, 9].  
50  
51  
52  
53  
54  
55  
56  
57  
58  
59  
60

1  
2  
3  
4  
5           Considering that multiple models are not created despite a small number of  
6 events and inappropriate analysis is often observed in a paper with a low impact factor,  
7 the reason why only significant variables are used is not caused only by the number of  
8 events, but by problems of the research system (including the absence of experts). In  
9 addition, the level of requirement from journals and the quality of peer review may be  
10 responsible.  
11  
12  
13

14  
15           Since medical and social influence from research is very large, and fair research  
16 performance is required, participation of biostatisticians is essential in clinical trials.  
17 However, ideally, experts should always participate in research even in observational  
18 studies because of the difficulty of appropriate adjustment for confounding including  
19 multivariate analysis. Even observational research can seriously affect clinical practice  
20 guidelines.  
21  
22  
23

24  
25           Based on the results of this study, the benefit of participation of medical statistics  
26 experts is obvious. Our results suggested that the proportion of experts' involvement is  
27 low in publications from East Asia, and there are relatively few publications in which  
28 the first author is an expert (Table 5). This would mean a shortage of such experts in  
29 these countries. The surveillance in 2011 by McKinsey Global Institute demonstrated  
30 that there are only small number of graduates with statistical training (including  
31 biostatistics) in Japan and China (2.66 and 1.31 graduates per 100 people in 2008, while  
32 8.11, 13.58 and 12.47 for the United States, the United Kingdom, and France,  
33 respectively) [10]. The shortage of biostatisticians has been considered a problem in  
34 Japan, but infrastructure for training and developing biostatisticians has been  
35 developed rapidly in recent years [11].  
36  
37  
38  
39  
40  
41

42           However, it takes a long time to develop enough well-trained experts. In situations with  
43 a lack of medical statistics experts, it should be advisable to establish a system to  
44 disclose the data used for publication to enable the data to be analyzed (including  
45 multivariate analysis) by external experts as part of the peer review process. Here,  
46 "external" includes foreign experts or experts who are not acquainted personally with  
47 the research team. For new drug applications, researchers are obliged to submit the  
48 dataset of clinical trial standardized by the CDISC standard to regulatory authorities  
49 (Food and Drug Administration: FDA, Pharmaceuticals and Medical Devices Agency:  
50 PMDA, etc.) for further validation and additional analysis. Such standardization should  
51 be a model in constructing the system as described above.  
52  
53  
54  
55  
56  
57  
58  
59  
60

1  
2  
3  
4  
5 Since clinicians performing clinical research are not necessarily full-time  
6 researchers and are usually very busy, they are the population that needs more support  
7 for medical statistics. In particular, those who are not involved in a huge research  
8 project (like a large epidemiological study) have difficulty accessing medical statistics  
9 experts. It is desirable to establish a support system for them within the peer review  
10 step regardless of the impact factor of the journal.  
11  
12  
13  
14

#### 15 **4.1. Limitations**

- 16 1) Large-scale research was dominant in the study papers; the number of small-scale  
17 research in which there are possibly many problems was limited. Although it may  
18 have been sampled according to the number of events, it is difficult to extract that  
19 information by search words.  
20
- 21 2) Since the definition of outcome is complicated, there are many possibilities of  
22 misclassification. Therefore, the reliability may be higher in the examination of the  
23 relative difference rather than absolute values.  
24
- 25 3) The number of factors related to the quality of multivariate analysis are far more  
26 than those examined in this study.  
27
- 28 4) Even papers classified under the undesirable outcome this time may not always be  
29 inappropriate as multivariate analysis. For example, when the purpose of  
30 multivariate analysis is to construct a predictive model, there is no problem if a  
31 model with high predictive power is finally created. Our outcomes should be  
32 considered as potential inappropriate/desirable use of multivariate analysis.  
33  
34  
35  
36  
37

#### 38 **4.2. Conclusion**

39 In publications about observational research in which the number of events is 50 or less  
40 without the involvement of medical statistics experts, more than 20% of publications  
41 may have problems in multivariate analysis. The involvement of experts was associated  
42 with desirable implementation of multivariate analysis independently of the number of  
43 events and the impact factor. The benefit of participation of medical statistics experts in  
44 the study is obvious. Since even observational research can be a source of important  
45 evidence in medical science, experts should be involved for proper confounding  
46 adjustment and interpretation of statistical models. We hope that this research will  
47 make medical researchers more conscious of the appropriate use of multivariate  
48 analysis.  
49  
50  
51  
52  
53

#### 54 **Funding source**

55  
56  
57  
58  
59  
60

1  
2  
3  
4  
5 This study was supported by Grants-in-Aid for Scientific research (C), JSPS KAKENHI  
6 grant Number JP 26460764 (Fiscal-year 2014-16, Masanori Nojima).  
7  
8

### 9 **Competing interest**

10 There are no competing interests.  
11  
12

### 13 **Author's contributions**

14 MN: Conception and design of the study, writing the manuscript, analysis and  
15 interpretation of data. MT: Acquisition and interpretation of data and data, critically  
16 revision of the manuscript. FN: Supervising the overall research, and critically revision  
17 of the manuscript.  
18  
19  
20  
21

### 22 **References**

- 23 1. Bouwmeester W, Zuithoff NP, Mallett S, Geerlings MI, Vergouwe Y, Steyerberg  
24 EW, Altman DG, Moons KG: Reporting and methods in clinical prediction  
25 research: a systematic review. *PLoS Med* 2012;9:1-12  
26
- 27 2. Sun GW, Shook TL, Kay GL: Inappropriate use of bivariable analysis to screen  
28 risk factors for use in multivariable analysis. *J Clin Epidemiol* 1996;49:907-16  
29
- 30 3. Harrell FE Jr, Lee KL, Mark DB: Multivariable prognostic models: issues in  
31 developing models, evaluating assumptions and adequacy, and measuring and  
32 reducing errors. *Stat Med* 1996;15:361-87  
33
- 34 4. Rothman KJ: *Epidemiology: An Introduction* / Kenneth J. Rothman. - 2nd ed.  
35 Oxford 2012  
36
- 37 5. Peduzzi P, Concato J, Kemper E, Holford TR, Feinstein AR: A simulation study of  
38 the number of events per variable in logistic regression analysis. *J Clin Epidemiol*  
39 1996;49:1373-9  
40
- 41 6. Peduzzi P, Concato J, Feinstein AR, Holford TR: Importance of events per  
42 independent variable in proportional hazards regression analysis. II. Accuracy  
43 and precision of regression estimates. *J Clin Epidemiol* 1995;48:1503-10  
44
- 45 7. Wasserstein RL, Lazar NA: The ASA's Statement on p-Values: Context, Process,  
46 and Purpose *Am Stat* 2016;70:129-33  
47
- 48 8. International Conference on Harmonisation E9 Expert Working Group: ICH  
49 Harmonised Tripartite Guideline. Statistical principles for clinical trials. *Stat*  
50 *Med* 1999;18:1905-42  
51
- 52 9. O'Neill RT, Temple R: The prevention and treatment of missing data in clinical  
53 trials: an FDA perspective on the importance of dealing with it. *Clin Pharmacol*  
54  
55  
56  
57  
58  
59  
60



1  
2  
3  
4  
5 Ther 2012;91:550-4

- 6  
7 10. Manyika J, Chui M, Brown B, Bughin J, Dobbs R, Roxburgh C, Byers AH: Big  
8 data: The next frontier for innovation, competition, and productivity McKinsey  
9 Global Institute 2011  
10  
11 11. Carpenter J: How biostatistics is of rapidly growing importance in Japan  
12 Statistics Views 2013  
13  
14

15 **Figure legends**

16 Figure 1. Summary of the selection of publications investigated in this study.

17  
18 Figure 2. A scatter plot for the correlation between the proportion of publications using  
19 an inappropriate algorithm in multivariate analysis and the proportion of publications  
20 in which medical statistics experts were included as co-authors. Inappropriate use of  
21 multivariate analysis and presence of experts are correlated inversely.  
22  
23  
24  
25  
26  
27  
28  
29  
30  
31  
32  
33  
34  
35  
36  
37  
38  
39  
40  
41  
42  
43  
44  
45  
46  
47  
48  
49  
50  
51  
52  
53  
54  
55  
56  
57  
58  
59  
60

Table 1. Characteristics of publications investigated in this study.

|                                               |              | Number of publications<br>(N = 1112) | %     |       |
|-----------------------------------------------|--------------|--------------------------------------|-------|-------|
| The number of events                          | <21          | 47                                   | 4.2%  |       |
|                                               | 21-50        | 122                                  | 11.0% |       |
|                                               | 51-100       | 96                                   | 8.6%  |       |
|                                               | 100<         | 847                                  | 76.2% |       |
| Impact factor                                 | Under 2      | 127                                  | 11.4% |       |
|                                               | 2-4<         | 160                                  | 14.4% |       |
|                                               | 4-6<         | 397                                  | 35.7% |       |
|                                               | Over 6       | 428                                  | 38.5% |       |
| Medical statistics experts<br>are included as | First author | Co-author                            |       |       |
|                                               | No           | No                                   | 418   | 37.6% |
|                                               | No           | Yes                                  | 321   | 28.9% |
|                                               | Yes          | Either                               | 373   | 33.5% |

Table 2. Estimated proportions of publications using inappropriate/desirable algorithms in multivariate analysis stratified by whether medical statistics experts were included as author or not.

| Events                                                                                     | 95%CI                                      |           |       |
|--------------------------------------------------------------------------------------------|--------------------------------------------|-----------|-------|
|                                                                                            | Proportion                                 | Lower     | Upper |
| 1. Using only significant variables in univariate analysis                                 | 6.4%                                       | 4.8%      | 8.5%  |
| Subgroup analysis                                                                          | Medical statistics experts are included as |           |       |
|                                                                                            | First author                               | Co-author |       |
|                                                                                            | No                                         | No        | 12.2% |
|                                                                                            | No                                         | Yes       | 3.5%  |
|                                                                                            | Yes                                        | Either    | 1.1%  |
|                                                                                            | 1st author or co-author                    |           | 2.1%  |
| 2. Using too many covariates for few events                                                | 17.4%                                      | 10.2%     | 28.0% |
| Subgroup analysis                                                                          | Medical statistics experts are included as |           |       |
|                                                                                            | First author                               | Co-author |       |
|                                                                                            | No                                         | No        | 22.1% |
|                                                                                            | No                                         | Yes       | 11.5% |
|                                                                                            | Yes                                        | Either    | 19.0% |
|                                                                                            | First author or co-author                  |           | 13.6% |
| 3. Constructing multiple multivariate models to assess the same outcome-factor association | 14.4%                                      | 11.1%     | 18.3% |
| Subgroup analysis                                                                          | Medical statistics experts are included as |           |       |
|                                                                                            | First author                               | Co-author |       |
|                                                                                            | No                                         | No        | 7.3%  |
|                                                                                            | No                                         | Yes       | 19.0% |
|                                                                                            | Yes                                        | Either    | 30.7% |
|                                                                                            | First author or co-author                  |           | 26.2% |

Table 3. Estimated proportions of publications using inappropriate/desirable algorithms in multivariate analysis stratified by the number of events, impact factor, and whether medical statistics experts were included as author or not.

| Subgroup                                                         |                       | Using only significant variables in univariate analysis |       |       | Constructing multiple multivariate models to assess the same outcome-factor association |       |       |
|------------------------------------------------------------------|-----------------------|---------------------------------------------------------|-------|-------|-----------------------------------------------------------------------------------------|-------|-------|
|                                                                  |                       | Proportion                                              | 95%CI |       | Proportion                                                                              | 95%CI |       |
|                                                                  |                       |                                                         | Lower | Upper |                                                                                         | Lower | Upper |
| Medical statistics experts included as first author or co-author | The number of events* |                                                         |       |       |                                                                                         |       |       |
| No                                                               | <51                   | 20.2%                                                   | 12.5% | 31.1% | 2.1%                                                                                    | 0.7%  | 5.9%  |
|                                                                  | 51-100                | 9.4%                                                    | 3.2%  | 24.7% | 3.2%                                                                                    | 1.1%  | 8.6%  |
|                                                                  | 100<                  | 8.6%                                                    | 5.1%  | 14.2% | 10.7%                                                                                   | 6.3%  | 17.7% |
| Yes                                                              | <51                   | 7.7%                                                    | 2.9%  | 18.9% | 12.6%                                                                                   | 5.0%  | 28.2% |
|                                                                  | 51-100                | 4.0%                                                    | 1.2%  | 13.0% | 30.1%                                                                                   | 16.5% | 48.6% |
|                                                                  | 100<                  | 1.6%                                                    | 0.8%  | 3.2%  | 27.0%                                                                                   | 20.6% | 34.6% |
| Medical statistics experts included as first author or co-author | Impact factor         |                                                         |       |       |                                                                                         |       |       |
| No                                                               | Under 2               | 30.6%                                                   | 17.1% | 48.4% | 4.0%                                                                                    | 1.1%  | 13.7% |
|                                                                  | 2-4<                  | 6.5%                                                    | 2.4%  | 16.3% | 3.4%                                                                                    | 0.8%  | 13.1% |
|                                                                  | 4-6<                  | 10.8%                                                   | 5.8%  | 19.2% | 11.7%                                                                                   | 6.1%  | 21.5% |
|                                                                  | Over 6                | 12.9%                                                   | 7.5%  | 21.1% | 9.0%                                                                                    | 4.2%  | 18.4% |
| Yes                                                              | Under 2               | 6.0%                                                    | 1.9%  | 17.2% | 16.2%                                                                                   | 5.4%  | 39.6% |
|                                                                  | 2-4<                  | 3.1%                                                    | 1.1%  | 8.6%  | 22.8%                                                                                   | 10.5% | 42.6% |
|                                                                  | 4-6<                  | 0.2%                                                    | 0.0%  | 1.1%  | 23.7%                                                                                   | 16.1% | 33.5% |
|                                                                  | Over 6                | 3.5%                                                    | 1.7%  | 6.9%  | 35.5%                                                                                   | 25.9% | 46.4% |

\*The category of "<21" has been integrated with the category "21 - 50" because of insufficient numbers

1  
2  
3  
4  
5  
6  
7  
8  
9  
10  
11  
12  
13  
14  
15  
16  
17  
18  
19  
20  
21  
22  
23  
24  
25  
26  
27  
28  
29  
30  
31  
32  
33  
34  
35  
36  
37  
38  
39  
40  
41  
42  
43  
44  
45  
46  
47

Table 4. Multivariate analysis for the assessment of the association between the absence of medical statistics experts and the use of inappropriate/desirable algorithms in multivariate analysis.

| Factor                                                                                                                    | Using only significant variables in univariate analysis |       |       | Constructing multiple multivariate models to assess the same outcome-factor association |       |       |
|---------------------------------------------------------------------------------------------------------------------------|---------------------------------------------------------|-------|-------|-----------------------------------------------------------------------------------------|-------|-------|
|                                                                                                                           | Odds ratio                                              | 95%CI |       | Odds ratio                                                                              | 95%CI |       |
|                                                                                                                           |                                                         | Lower | Upper |                                                                                         | Lower | Upper |
| Medical statistics experts included as first author or co-author (vs. no experts)                                         | 0.28                                                    | 0.15  | 0.53  | 3.51                                                                                    | 1.88  | 6.58  |
| Medical statistics experts included as first author or co-author (vs. no experts) when 1st author is clinicians or others | 0.42                                                    | 0.19  | 0.97  | 2.36                                                                                    | 1.03  | 5.38  |

All models were adjusted for impact factor and the number of events.

Table 5. Summary of each country and proportion of publications in which medical statistics experts were included as co-author within the publications in which the first author is not an expert in these fields.

| Country      | Total number of publications | Occupancy (%) | Estimates                                                                     |                                                                                                                                          |
|--------------|------------------------------|---------------|-------------------------------------------------------------------------------|------------------------------------------------------------------------------------------------------------------------------------------|
|              |                              |               | Publications in which the first author is NOT a medical statistics expert (%) | Medical experts are included as co-author within publications in which the first author is not an expert.<br>Proportion* (%)      95%CI* |
| USA          | 501                          | 45.1          | 67.9                                                                          | 47.4 (40-54.9)                                                                                                                           |
| UK           | 63                           | 5.7           | 48.2                                                                          | 22.0 (9.6-42.7)                                                                                                                          |
| China        | 51                           | 4.6           | 84.5                                                                          | 6.7 (2.5-17.1)                                                                                                                           |
| Canada       | 48                           | 4.3           | 67.4                                                                          | 50.7 (31.5-69.6)                                                                                                                         |
| Netherlands  | 46                           | 4.1           | 73.1                                                                          | 37.4 (18.3-61.5)                                                                                                                         |
| Japan        | 45                           | 4.0           | 81.2                                                                          | 15.3 (6.8-30.9)                                                                                                                          |
| South Korea  | 39                           | 3.5           | 79.5                                                                          | 14.3 (4.9-35.1)                                                                                                                          |
| Sweden       | 38                           | 3.4           | 40.0                                                                          | 45.3 (22.7-70)                                                                                                                           |
| Taiwan       | 29                           | 2.6           | 91.3                                                                          | 38.8 (19.1-62.9)                                                                                                                         |
| Germany      | 27                           | 2.4           | 80.1                                                                          | 41.7 (21.9-64.6)                                                                                                                         |
| Denmark      | 26                           | 2.3           | 55.4                                                                          | 48.9 (23.9-74.5)                                                                                                                         |
| Italy        | 25                           | 2.2           | 71.4                                                                          | 13.6 (4.1-36.3)                                                                                                                          |
| Australia    | 25                           | 2.2           | 42.5                                                                          | 50.6 (16.4-84.3)                                                                                                                         |
| France       | 21                           | 1.9           | 57.5                                                                          | 77.7 (46.5-93.3)                                                                                                                         |
| Spain        | 19                           | 1.7           | 62.6                                                                          | 32.7 (11.8-63.8)                                                                                                                         |
| Brazil       | 13                           | 1.2           | 51.1                                                                          | 4.6 (0.6-29.3)                                                                                                                           |
| Norway       | 11                           | 1.0           | 48.4                                                                          | 44.8 (9.7-86)                                                                                                                            |
| Finland      | 8                            | 0.7           | 85.8                                                                          |                                                                                                                                          |
| Switzerland  | 8                            | 0.7           | 39.6                                                                          |                                                                                                                                          |
| Israel       | 7                            | 0.6           | 60.9                                                                          |                                                                                                                                          |
| Singapore    | 6                            | 0.5           | 92.8                                                                          |                                                                                                                                          |
| Belgium      | 6                            | 0.5           | 64.8                                                                          |                                                                                                                                          |
| Turkey       | 5                            | 0.4           | 100                                                                           |                                                                                                                                          |
| Austria      | 4                            | 0.4           | 100                                                                           |                                                                                                                                          |
| South Africa | 4                            | 0.4           | 57.4                                                                          |                                                                                                                                          |
| Kenya        | 4                            | 0.4           | 11.5                                                                          |                                                                                                                                          |
| Poland       | 3                            | 0.3           | 100                                                                           |                                                                                                                                          |
| India        | 3                            | 0.3           | 76.3                                                                          |                                                                                                                                          |
| Thailand     | 3                            | 0.3           | 31.3                                                                          |                                                                                                                                          |
| Iran         | 3                            | 0.3           | 34.2                                                                          |                                                                                                                                          |
| Greece       | 2                            | 0.2           | 82.9                                                                          |                                                                                                                                          |
| Ireland      | 2                            | 0.2           | 32.4                                                                          |                                                                                                                                          |
| Others       | 17                           | 3.4           | 47.4                                                                          |                                                                                                                                          |
| Overall      | 1112                         | 100           | 67.3                                                                          | 39.0 (32.2-45.4)                                                                                                                         |

\*Calculated only for countries with publications more than 10.

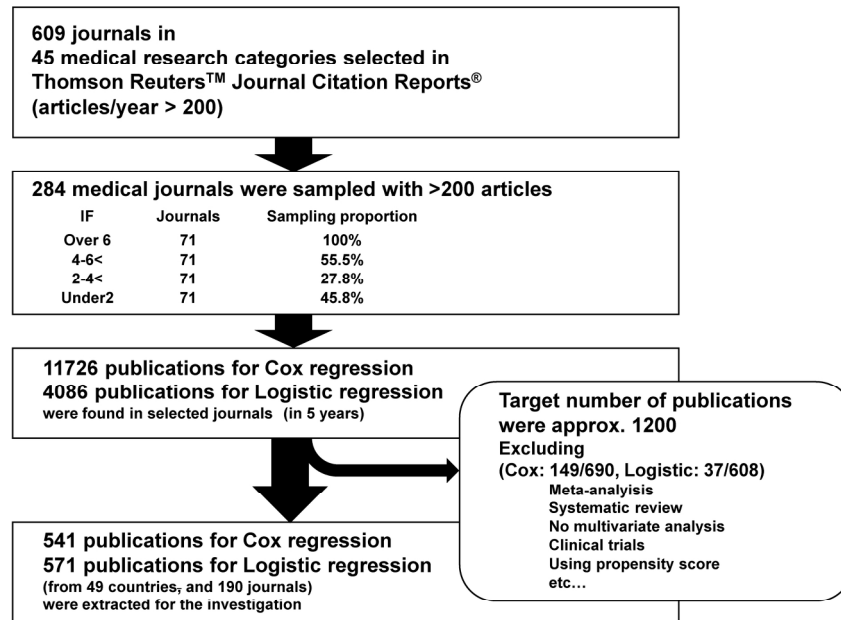

28  
29  
30  
31  
32  
33  
34  
35  
36  
37  
38  
39  
40  
41  
42  
43  
44  
45  
46  
47  
48  
49  
50  
51  
52  
53  
54  
55  
56  
57  
58  
59  
60

**Figure 1.**

Summary of the selection of publications investigated in this study.

190x142mm (300 x 300 DPI)

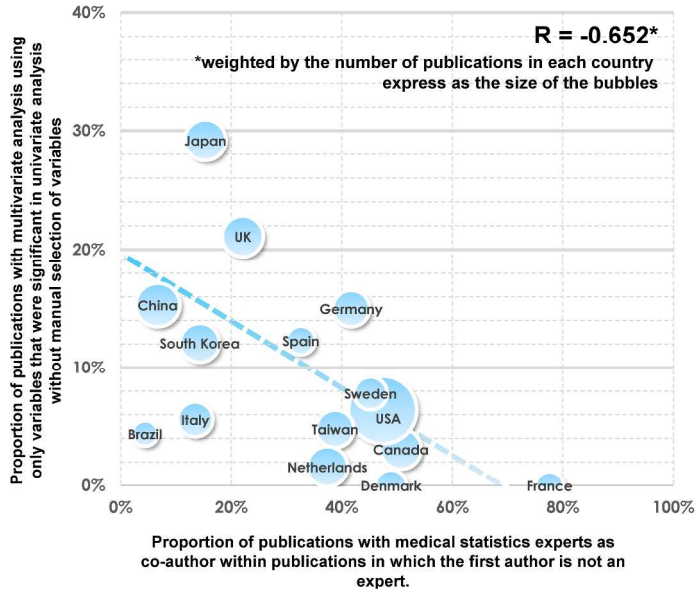

**Figure 2.**

A scatter plot for the correlation between the proportion of publications using an inappropriate algorithm in multivariate analysis and the proportion of publications in which medical statistics experts were included as co-authors. Inappropriate use of multivariate analysis and presence of experts are correlated inversely.

254x338mm (300 x 300 DPI)



## Supplementary Table 1. Selected research filed in Thomson Reuter's Journal Citation Report (version 2014)

---

1 ALLERGY  
2  
3 ANESTHESIOLOGY  
4  
5 CARDIAC & CARDIOVASCULAR SYSTEMS  
6  
7 CLINICAL NEUROLOGY  
8  
9 CRITICAL CARE MEDICINE  
10  
11 DENTISTRY, ORAL SURGERY & MEDICINE  
12  
13 DERMATOLOGY  
14  
15 EMERGENCY MEDICINE  
16  
17 ENDOCRINOLOGY & METABOLISM  
18  
19 ENVIRONMENTAL SCIENCES  
20  
21 GASTROENTEROLOGY & HEPATOLOGY  
22  
23 GERIATRICS & GERONTOLOGY  
24  
25 HEALTH CARE SCIENCES & SERVICES  
26  
27 HEMATOLOGY  
28  
29 IMMUNOLOGY  
30  
31 INFECTIOUS DISEASES  
32  
33 INTEGRATIVE & COMPLEMENTARY MEDICINE  
34  
35 MEDICINE, GENERAL & INTERNAL  
36  
37 MEDICINE, RESEARCH & EXPERIMENTAL  
38  
39 NEUROSCIENCES  
40  
41 NURSING  
42  
43 NUTRITION & DIETETICS  
44  
45 OBSTETRICS & GYNECOLOGY  
46  
47 ONCOLOGY  
48  
49 OPHTHALMOLOGY  
50  
51 ORTHOPEDICS  
52  
53 OTORHINOLARYNGOLOGY  
54  
55 PATHOLOGY  
56  
57 PEDIATRICS  
58  
59 PERIPHERAL VASCULAR DISEASE  
60  
PHARMACOLOGY & PHARMACY  
PSYCHIATRY  
PUBLIC, ENVIRONMENTAL & OCCUPATIONAL HEALTH  
RADIOLOGY, NUCLEAR MEDICINE & MEDICAL IMAGING  
REHABILITATION  
REPRODUCTIVE BIOLOGY  
RESPIRATORY SYSTEM  
RHEUMATOLOGY  
SURGERY  
TOXICOLOGY  
TRANSPLANTATION  
TROPICAL MEDICINE  
UROLOGY & NEPHROLOGY  
VIROLOGY  
SUBSTANCE ABUSE

---

Supplementary Table 2. Journals selected for the investigation in this study.

| 2013 impact factor   |                      |                      |                      |
|----------------------|----------------------|----------------------|----------------------|
| Over 6               | 4-<6                 | 2-<4                 | Under 2              |
| NEW ENGL J MED       | ENVIRON MODELL SOFTW | TOXICON              | TURK GOGUS KALP DAMA |
| LANCET               | PEDIATRICS           | J NEUROL SCI         | RENAL FAILURE        |
| JAMA-J AM MED ASSOC  | PSYCHO-ONCOLOGY      | AM J NEURORADIOL     | ENVIRON MONIT ASSESS |
| J CLIN ONCOL         | EXP NEUROL           | PHYTOTHER RES        | ZH NEVROL PSIKHIATR  |
| BMJ-BRIT MED J       | ALIMENT PHARM THER   | INT J TUBERC LUNG D  | ANIM REPROD SCI      |
| NEURON               | PLOS NEGLECT TROP D  | J UROLOGY            | NEUROL SCI           |
| ENERG ENVIRON SCI    | AM J OBSTET GYNECOL  | AGR ECOSYST ENVIRON  | J EMERG MED          |
| J AM COLL CARDIOL    | AM J PATHOL          | EXP CELL RES         | ENVIRON TOXICOL PHAR |
| NAT NEUROSCI         | PAIN                 | DIABETES RES CLIN PR | BRAIN INJURY         |
| CIRCULATION          | INT J RADIAT ONCOL   | OBES SURG            | BMC PEDIATR          |
| EUR HEART J          | J AM MED INFORM ASSN | J VISION             | AM J MED SCI         |
| SCI TRANSL MED       | THROMB HAEMOSTASIS   | AM J INFECT CONTROL  | WATER SCI TECHNOL    |
| GASTROENTEROLOGY     | J THROMB HAEMOST     | ENVIRON TOXICOL CHEM | J STROKE CEREBROVASC |
| J EXP MED            | ARTHRIT CARE RES     | DRUG ALCOHOL DEPEN   | CLINICS              |
| J CLIN INVEST        | EUR J CANCER         | ECOL ECON            | PROG UROL            |
| AM J RESP CRIT CARE  | AM J RESP CELL MOL   | BMC NEUROL           | ENVIRON SCI-PROC IMP |
| J ALLERGY CLIN IMMUN | PSYCHOL MED          | VIRUS RES            | J VIROL METHODS      |
| HEPATOLOGY           | BRIT J PHARMACOL     | BIOL REPROD          | BURNS                |
| CIRC RES             | AM J EPIDEMIOL       | EUR J GASTROEN HEPAT | J NEUROSCI METH      |
| J HEPATOL            | RESUSCITATION        | APPL CATAL A-GEN     | J ORAL MAXIL SURG    |
| NEUROSCI BIOBEHAV R  | MOVEMENT DISORD      | BREAST               | PAK J MED SCI        |
| BRAIN                | BIOCHEM PHARMACOL    | J NEURO-ONCOL        | INT J ORAL MAX IMPL  |
| BLOOD                | NEUROBIOL AGING      | SPINE J              | ANN VASC SURG        |
| BIOL PSYCHIAT        | AM J KIDNEY DIS      | EUR J PHARM SCI      | KARDIOL POL          |
| CLIN INFECT DIS      | J TRANSL MED         | TRANSPLANTATION      | J CARDIOTHOR VASC AN |
| LEUKEMIA             | GASTROINTEST ENDOSC  | J PHARMACEUT BIOMED  | CHINESE MED J-PEKING |
| CANCER RES           | HAEMATOLOGICA        | BMC PREGNANCY CHILDB | RHEUMATOL INT        |
| ANN RHEUM DIS        | RHEUMATOLOGY         | AM J TROP MED HYG    | B ENVIRON CONTAM TOX |
| DIABETES CARE        | PROG NEURO-PSYCHOPH  | J ENVIRON MANAGE     | SUSTAINABILITY-BASEL |
| ONCOGENE             | CLIN J AM SOC NEPHRO | TOXICOL IN VITRO     | BONE JOINT J         |
| KIDNEY INT           | J AM COLL SURGEONS   | MAGN RESON IMAGING   | INT J CLIN EXP PATHO |
| DIABETES             | J THORAC CARDIOV SUR | CORNEA               | FOOT ANKLE INT       |
| CEREB CORTEX         | AM J SURG PATHOL     | CHEMOSPHERE          | EUR J OBSTET GYN R B |
| NEUROLOGY            | REMOTE SENS ENVIRON  | GEN COMP ENDOCR      | ENVIRON MANAGE       |
| GLOBAL CHANGE BIOL   | J NUTR               | CLIN ORAL IMPLAN RES | INT J GYNECOL CANCER |
| CLIN CANCER RES      | OBESITY              | BRIT J OPHTHALMOL    | SURG TODAY           |
| PLOS PATHOG          | EUR RADIOL           | TOXICOL APPL PHARM   | ONCOL LETT           |
| ARTHRITIS RHEUM-US   | J AM ACAD DERMATOL   | AM J CARDIOL         | INTERNAL MED         |
| NEUROPSYCHOPHARMACOL | INT J OBESITY        | CLIN VACCINE IMMUNOL | J DRUGS DERMATOL     |
| ANTIOXID REDOX SIGN  | PHARM RES-DORDR      | SLEEP MED            | SKELETAL RADIOL      |
| HYPERTENSION         | J PHYSIOL-LONDON     | CLIN EXP RHEUMATOL   | PHARM BIOL           |
| EMERG INFECT DIS     | BIOL CONSERV         | MOL VIS              | PEDIATR EMERG CARE   |
| BMC MED              | ARTERIOSCL THROM VAS | J AM HEART ASSOC     | PEDIATR CARDIOL      |
| J CONTROL RELEASE    | ENVIRON POLLUT       | FOOD CHEM TOXICOL    | EMERG MED J          |
| ANN SURG             | J NEUROCHEM          | EUR J PHARMACOL      | J CRANIOFAC SURG     |
| STEM CELLS           | ATHEROSCLEROSIS      | ACTA TROP            | AM J EMERG MED       |
| CHEST                | HUM REPROD           | SPINE                | ANTICANCER RES       |
| EUR RESPIR J         | AM HEART J           | FRONT HUM NEUROSCI   | ACTA NEUROCHIR       |
| ENVIRON HEALTH PERSP | BREAST CANCER RES TR | MAGN RESON MED       | PEDIATR RADIOL       |
| HUM BRAIN MAPP       | J CEREBR BLOOD F MET | NEUROSCIENCE         | HEPATO-GASTROENTEROL |
| AM J CLIN NUTR       | FERTIL STERIL        | CURR MED CHEM        | J CLIN NEUROSCI      |
| DIABETOLOGIA         | CAN J CARDIOL        | J SEX MED            | ACTA PAEDIATR        |
| J NEUROSCI           | RADIOTHER ONCOL      | NUTRIENTS            | INDIAN J SURG        |
| J BONE MINER RES     | J AM GERIATR SOC     | NEPHROL DIAL TRANSPL | RESP PHYSIOL NEUROBI |
| ANN ONCOL            | TOXICOL SCI          | FRONT NEURAL CIRCUIT | DEUT MED WOCHENSCHR  |
| AIDS                 | BONE                 | PRENATAL DIAG        | J MATERN-FETAL NEO M |
| CLIN GASTROENTEROL H | LIVER INT            | J GEN INTERN MED     | INT J MED SCI        |
| MOL THER             | ENVIRON RES LETT     | ARTHROSCOPY          | INT J ENDOCRINOL     |
| J INVEST DERMATOL    | BRIT J ANAESTH       | INT J ONCOL          | OTOL NEUROTOL        |
| J CLIN ENDOCR METAB  | INFECT IMMUN         | ENVIRON SCI POLLUT R | INT J PEDIATR OTORHI |
| RADIOLOGY            | HEALTH AFFAIR        | TRIALS               | TERAPEVT ARKH        |
| AM J TRANSPLANT      | CANCER-AM CANCER SOC | INVEST OPHTH VIS SCI | ANZ J SURG           |
| INT J CARDIOL        | OSTEOPOROSIS INT     | ARCH VIROL           | J KOREAN MED SCI     |
| OPHTHALMOLOGY        | CANCER EPIDEM BIOMAR | AM J ROENTGENOL      | OR SURG OR MED OR PA |
| ANESTHESIOLOGY       | PSYCHOPHARMACOLOGY   | UROL ONCOL-SEMIN ORI | J OBSTET GYNAECOL    |
| CRIT CARE MED        | ADDICTION            | AM J PHYSIOL-GASTR L | IRAN J PUBLIC HEALTH |
| NEUROIMAGE           | NEUROPHARMACOLOGY    | QUAL LIFE RES        | OTOLARYNG HEAD NECK  |
| MOL CANCER THER      | INT J CANCER         | COLORECTAL DIS       | J PAEDIATR CHILD H   |
| CORTEX               | J NUTR BIOCHEM       | VIROL J              | BMC COMPLEM ALTERN M |
| HEART                | MOL CELL ENDOCRINOL  | WASTE MANAGE         | BRIT J ORAL MAX SURG |
| STROKE               | MOL PHARMACOL        | EUR J CLIN PHARMACOL | J ENVIRON SCI-CHINA  |

Supplementary Table 3. Example of multivariate analysis: logistic regression analysis for recurrence after surgery of hypothetical cancer with potential prognostic factors.

Univariate Analysis

| Potential prognostic factors | P value | Odds ratio | 95% Confidence Interval |       |
|------------------------------|---------|------------|-------------------------|-------|
|                              |         |            | Lower                   | Upper |
| Adjuvant chemotherapy        | 0.101   | 0.45       | 0.17                    | 1.17  |
| Lymph node metastasis        | <0.001  | 8.31       | 2.88                    | 24.00 |
| Biomarker positive           | <0.001  | 17.11      | 5.38                    | 54.39 |

Multivariate Analysis

| Potential prognostic factors                            | P value | Odds ratio   | 95% Confidence Interval |       | P value                                    | Odds ratio   | 95% Confidence Interval |       |
|---------------------------------------------------------|---------|--------------|-------------------------|-------|--------------------------------------------|--------------|-------------------------|-------|
|                                                         |         |              | Lower                   | Upper |                                            |              | Lower                   | Upper |
| Multivariate analysis 1                                 |         |              |                         |       | Multivariate analysis 2                    |              |                         |       |
| Using only significant variables in univariate analysis |         |              |                         |       | Using all potential prognostic factors     |              |                         |       |
| Adjuvant chemotherapy                                   |         | Not included |                         |       | 0.015                                      | 0.14         | 0.03                    | 0.69  |
| Lymph node metastasis                                   | 0.005   | 6.08         | 1.72                    | 21.51 | 0.001                                      | 12.60        | 2.67                    | 59.42 |
| Biomarker positive                                      | <0.001  | 13.77        | 3.99                    | 47.48 | <0.001                                     | 16.05        | 4.11                    | 62.69 |
| Multivariate analysis 3                                 |         |              |                         |       | Multivariate analysis 4                    |              |                         |       |
| Adjuvant chemotherapy + Lymph node metastasis           |         |              |                         |       | Adjuvant chemotherapy + Biomarker positive |              |                         |       |
| Adjuvant chemotherapy                                   | 0.013   | 0.18         | 0.05                    | 0.70  | 0.093                                      | 0.35         | 0.10                    | 1.19  |
| Lymph node metastasis                                   | <0.001  | 15.63        | 4.03                    | 60.61 |                                            | Not included |                         |       |
| Biomarker positive                                      |         | Not included |                         |       | <0.001                                     | 18.92        | 5.61                    | 63.89 |

Inappropriate conclusion about adjuvant chemotherapy:  
With multivariate analysis 1, adjuvant chemotherapy has no effect.

Desirable conclusion about adjuvant chemotherapy:  
With multivariate analyses 2 to 4, adjuvant chemotherapy was inversely associated with recurrence after adjustment for lymph node metastasis.  
Lymph node metastasis was a stronger confounder for the association between adjuvant chemotherapy and recurrence than the biomarker.

Supplementary Table 4. Cross-tabulation table for the association between adjuvant chemotherapy and recurrence stratified by lymph node metastasis for hypothetical cancer.

| Lymph node metastasis |                               | No recurrence |       | recurrence |       | Total  |
|-----------------------|-------------------------------|---------------|-------|------------|-------|--------|
|                       |                               | Number        | %     | Number     | %     | Number |
| Absent                | Without adjuvant chemotherapy | 22            | 73.3% | 8          | 26.7% | 30     |
|                       | With adjuvant chemotherapy    | 22            | 91.7% | 2          | 8.3%  | 24     |
|                       | Total                         | 44            | 81.5% | 10         | 18.5% | 54     |
| Present               | Without adjuvant chemotherapy | 1             | 10.0% | 9          | 90.0% | 10     |
|                       | With adjuvant chemotherapy    | 8             | 50.0% | 8          | 50.0% | 16     |
|                       | Total                         | 9             | 34.6% | 17         | 65.4% | 26     |
| Overall               | Without adjuvant chemotherapy | 23            | 57.5% | 17         | 42.5% | 40     |
|                       | With adjuvant chemotherapy    | 30            | 75.0% | 10         | 25.0% | 40     |
|                       | Total                         | 53            | 66.3% | 27         | 33.8% | 80     |

Chi-square test for 2x2 table without stratification (Overall):  $P = 0.098$

Odds ratio: 0.45 95% Confidence Interval 0.17-1.17

Mantel-Haenszel test for stratified analysis:  $P = 0.013$

Common odds ratio: 0.19 95% Confidence Interval 0.05-0.71

STROBE Statement—Checklist of items that should be included in reports of *cross-sectional studies*

|                              | <b>Item No</b> | <b>Recommendation</b>                                                                                                                                                                                                                                                                                                                                                                                                                                                                                                                                                                                                               |
|------------------------------|----------------|-------------------------------------------------------------------------------------------------------------------------------------------------------------------------------------------------------------------------------------------------------------------------------------------------------------------------------------------------------------------------------------------------------------------------------------------------------------------------------------------------------------------------------------------------------------------------------------------------------------------------------------|
| <b>Title and abstract</b>    | 1              | (a) Indicate the study's design with a commonly used term in the title or the abstract<br>A cross-sectional study<br>(b) Provide in the abstract an informative and balanced summary of what was done and what was found<br>See Abstract                                                                                                                                                                                                                                                                                                                                                                                            |
| <b>Introduction</b>          |                |                                                                                                                                                                                                                                                                                                                                                                                                                                                                                                                                                                                                                                     |
| Background/rationale         | 2              | Explain the scientific background and rationale for the investigation being reported<br>See Introduction section                                                                                                                                                                                                                                                                                                                                                                                                                                                                                                                    |
| Objectives                   | 3              | State specific objectives, including any prespecified hypotheses<br>See Abstract and Introduction                                                                                                                                                                                                                                                                                                                                                                                                                                                                                                                                   |
| <b>Methods</b>               |                |                                                                                                                                                                                                                                                                                                                                                                                                                                                                                                                                                                                                                                     |
| Study design                 | 4              | Present key elements of study design early in the paper<br>See Materials and methods section (Selection of applicable journals and publications)                                                                                                                                                                                                                                                                                                                                                                                                                                                                                    |
| Setting                      | 5              | Describe the setting, locations, and relevant dates, including periods of recruitment, exposure, follow-up, and data collection<br>See Materials and methods section (Selection of applicable journals and publications)                                                                                                                                                                                                                                                                                                                                                                                                            |
| Participants                 | 6              | (a) Give the eligibility criteria, and the sources and methods of selection of participants<br>See Materials and methods section (Selection of applicable journals and publications)                                                                                                                                                                                                                                                                                                                                                                                                                                                |
| Variables                    | 7              | Clearly define all outcomes, exposures, predictors, potential confounders, and effect modifiers. Give diagnostic criteria, if applicable<br>See Materials and methods section (Surveillance and Outcomes)                                                                                                                                                                                                                                                                                                                                                                                                                           |
| Data sources/<br>measurement | 8*             | For each variable of interest, give sources of data and details of methods of assessment (measurement). Describe comparability of assessment methods if there is more than one group<br>See Materials and methods section (Surveillance and Outcomes)                                                                                                                                                                                                                                                                                                                                                                               |
| Bias                         | 9              | Describe any efforts to address potential sources of bias<br>See Materials and methods section (Surveillance, Outcomes and Statistical analyses)                                                                                                                                                                                                                                                                                                                                                                                                                                                                                    |
| Study size                   | 10             | Explain how the study size was arrived at<br>1112 (see Results)                                                                                                                                                                                                                                                                                                                                                                                                                                                                                                                                                                     |
| Quantitative variables       | 11             | Explain how quantitative variables were handled in the analyses. If applicable, describe which groupings were chosen and why<br>See Materials and methods section (Surveillance, Outcomes and Statistical analyses)                                                                                                                                                                                                                                                                                                                                                                                                                 |
| Statistical methods          | 12             | (a) Describe all statistical methods, including those used to control for confounding<br>See Materials and methods section (Statistical analyses) and Results section<br>(b) Describe any methods used to examine subgroups and interactions<br>See Materials and methods section (Statistical analyses) and Results section<br>(c) Explain how missing data were addressed<br>See Materials and methods section (Surveillance, Outcomes and Statistical analyses)<br>(d) If applicable, describe analytical methods taking account of sampling strategy<br>See Materials and methods section (Selection of applicable journals and |

|                          |     |                                                                                                                                                                                                                                                                                                                                 |
|--------------------------|-----|---------------------------------------------------------------------------------------------------------------------------------------------------------------------------------------------------------------------------------------------------------------------------------------------------------------------------------|
|                          |     | publications)                                                                                                                                                                                                                                                                                                                   |
|                          |     | (e) Describe any sensitivity analyses                                                                                                                                                                                                                                                                                           |
|                          |     | See Materials and methods section (Statistical analyses) and Results section                                                                                                                                                                                                                                                    |
| <b>Results</b>           |     |                                                                                                                                                                                                                                                                                                                                 |
| Participants             | 13* | (a) Report numbers of individuals at each stage of study—eg numbers potentially eligible, examined for eligibility, confirmed eligible, included in the study, completing follow-up, and analysed<br>See Results section (Characteristics of investigated publications and Descriptive statistics of the outcomes) and Figure 1 |
|                          |     | (b) Give reasons for non-participation at each stage<br>See Figure 1                                                                                                                                                                                                                                                            |
|                          |     | (c) Consider use of a flow diagram<br>See Figure 1                                                                                                                                                                                                                                                                              |
| Descriptive data         | 14* | (a) Give characteristics of study participants (eg demographic, clinical, social) and information on exposures and potential confounders<br>See Results section (Characteristics of investigated publications and Descriptive statistics of the outcomes)                                                                       |
|                          |     | (b) Indicate number of participants with missing data for each variable of interest<br>See Figure 1                                                                                                                                                                                                                             |
| Outcome data             | 15* | Report numbers of outcome events or summary measures<br>See Results section (Characteristics of investigated publications and Descriptive statistics of the outcomes)                                                                                                                                                           |
| Main results             | 16  | (a) Give unadjusted estimates and, if applicable, confounder-adjusted estimates and their precision (eg, 95% confidence interval). Make clear which confounders were adjusted for and why they were included<br>See Tables                                                                                                      |
|                          |     | (b) Report category boundaries when continuous variables were categorized<br>See Tables                                                                                                                                                                                                                                         |
|                          |     | (c) If relevant, consider translating estimates of relative risk into absolute risk for a meaningful time period<br>N/A                                                                                                                                                                                                         |
| Other analyses           | 17  | Report other analyses done—eg analyses of subgroups and interactions, and sensitivity analyses<br>See Tables                                                                                                                                                                                                                    |
| <b>Discussion</b>        |     |                                                                                                                                                                                                                                                                                                                                 |
| Key results              | 18  | Summarise key results with reference to study objectives<br>See the 1st paragraph in Discussion section                                                                                                                                                                                                                         |
| Limitations              | 19  | Discuss limitations of the study, taking into account sources of potential bias or imprecision. Discuss both direction and magnitude of any potential bias<br>See Discussion section                                                                                                                                            |
| Interpretation           | 20  | Give a cautious overall interpretation of results considering objectives, limitations, multiplicity of analyses, results from similar studies, and other relevant evidence<br>See Discussion section                                                                                                                            |
| Generalisability         | 21  | Discuss the generalisability (external validity) of the study results<br>See Discussion section                                                                                                                                                                                                                                 |
| <b>Other information</b> |     |                                                                                                                                                                                                                                                                                                                                 |
| Funding                  | 22  | Give the source of funding and the role of the funders for the present study and, if                                                                                                                                                                                                                                            |

---

applicable, for the original study on which the present article is based

See Funding source section

---

\*Give information separately for exposed and unexposed groups.

**Note:** An Explanation and Elaboration article discusses each checklist item and gives methodological background and published examples of transparent reporting. The STROBE checklist is best used in conjunction with this article (freely available on the Web sites of PLoS Medicine at <http://www.plosmedicine.org/>, Annals of Internal Medicine at <http://www.annals.org/>, and Epidemiology at <http://www.epidem.com/>). Information on the STROBE Initiative is available at [www.strobe-statement.org](http://www.strobe-statement.org).

For peer review only

# BMJ Open

## A quantitative investigation of inappropriate regression model construction and the importance of medical statistics experts in observational medical research: a cross-sectional study

|                                 |                                                                                                                                                                                                                                                                                                                                                       |
|---------------------------------|-------------------------------------------------------------------------------------------------------------------------------------------------------------------------------------------------------------------------------------------------------------------------------------------------------------------------------------------------------|
| Journal:                        | <i>BMJ Open</i>                                                                                                                                                                                                                                                                                                                                       |
| Manuscript ID                   | bmjopen-2017-021129.R1                                                                                                                                                                                                                                                                                                                                |
| Article Type:                   | Research                                                                                                                                                                                                                                                                                                                                              |
| Date Submitted by the Author:   | 03-Apr-2018                                                                                                                                                                                                                                                                                                                                           |
| Complete List of Authors:       | Nojima, Masanori; the Institute of Medical Science, the University of Tokyo, Center for Translational Research<br>Tokunaga, Mutsumi; the Institute of Medical Science, the University of Tokyo, Center for Translational Research<br>Nagamura, Fumitaka; the Institute of Medical Science, the University of Tokyo, Center for Translational Research |
| <b>Primary Subject Heading</b>: | Medical publishing and peer review                                                                                                                                                                                                                                                                                                                    |
| Secondary Subject Heading:      | Epidemiology                                                                                                                                                                                                                                                                                                                                          |
| Keywords:                       | multivariate analysis, regression analysis, biostatistics, clinical research, observational research, medical statistics expert                                                                                                                                                                                                                       |
|                                 |                                                                                                                                                                                                                                                                                                                                                       |

SCHOLARONE™  
Manuscripts

Only



1  
2  
3  
4  
5 A quantitative investigation of inappropriate regression model construction and the  
6 importance of medical statistics experts in observational medical research: a  
7 cross-sectional study  
8  
9

10 Masanori Nojima<sup>1,2</sup>, Mutsumi Tokunaga<sup>1,3</sup>, and Fumitaka Nagamura<sup>1,2</sup>

11 1. Center for Translational Research, the Institute of Medical Science, the University of  
12 Tokyo  
13

14 2. The Division of Advanced Medicine Promotion, the Institute of Medical Science, the  
15 University of Tokyo  
16

17 3. Department of Health and Social Behavior, the University of Tokyo, School of Public  
18 Health  
19  
20

21  
22 **Corresponding Author**

23 Masanori Nojima

24 Center for Translational Research / The Division of Advanced Medicine Promotion, the  
25 Institute of Medical Science, the University of Tokyo  
26

27 TEL: +81-6409-2340

28 Email: nojima@ims.u-tokyo.ac.jp  
29  
30  
31  
32  
33  
34  
35  
36  
37  
38  
39  
40  
41  
42  
43  
44  
45  
46  
47  
48  
49  
50  
51  
52  
53  
54  
55  
56  
57  
58  
59  
60

## Abstract

Objective: To investigate under what circumstances inappropriate use of “multivariate analysis” is likely to occur and to identify the population that needs more support with medical statistics.

Study Design and Settings: The frequency of inappropriate regression model construction in multivariate analysis and related-factors were investigated in observational medical research publications.

Results: The inappropriate algorithm of using only variables that were significant in univariate analysis was estimated to occur at 6.4% (95%CI: 4.8-8.5%). This was observed in 1.1% of the publications with a medical statistics expert (hereinafter “expert”) as the first author, 3.5% if an expert was included as co-author, and in 12.2% if experts were not involved. In the publications where the number of cases was 50 or less and the study did not include experts, inappropriate algorithm usage was observed with a high proportion of 20.2%. The odds ratio of the involvement of experts for this outcome was 0.28 (95%CI: 0.15-0.53). A further, nation-level, analysis showed that the involvement of experts and the implementation of unfavorable multivariate analysis are associated at the nation-level analysis ( $R = -0.652$ ).

Conclusion: Based on the results of this study, the benefit of participation of medical statistics experts is obvious. Experts should be involved for proper confounding adjustment and interpretation of statistical models.

## Keywords

multivariate analysis; regression analysis; biostatistics; clinical research; observational research; medical statistics expert;

## Strengths and limitations of this study

### *Strengths*

- This is a unique research that quantitatively investigated the frequency and the factors leading to inappropriate use of algorithms for variable selection in multivariate analysis.
- We also evaluated the quantitative efficacy of the involvement of medical statistics experts, and the importance of experts' participation in medical research became clear.
- The association between absence of experts and inappropriate multivariate analysis was remarkable in the nation-level investigation.

### ***Limitations***

- There are many possibilities for outcome misclassification due to complicated definition, and the number of factors related to the quality of multivariate analysis are far more than those examined in this study.

### **1. Introduction**

In the medical research field, "multivariate analysis" (some claim that it should be called "multivariable analysis"; the usage of this term is discussed later), typified by logistic regression or Cox regression, is widely used as a means of controlling confounding in observational research and creating a prognostic prediction model [1]. As statistical analysis software became widely used, multivariate analysis also became familiar to many medical researchers and clinicians. Although multivariate analysis is easily executed using software, understanding the statistical assumptions that constitute the premise of multivariate analysis and interpretation of the statistical model are very difficult for researchers who do not specialize in biostatistics. Moreover, common misconceptions have been formed among medical researchers who are not specialized in statistics, which can interfere with correct understanding and interpretation of the results.

An American medical journal, "Annals of Internal Medicine" (<http://annals.org/aim/pages/AuthorInformationStatisticsOnly>) describes its representative example as general statistical guidance on their website.

"Approaches that select factors for inclusion in a multivariable model only if the factors are 'statistically significant' in 'bivariate screening' are not optimal. A factor can be a confounder even if it is not statistically significant by itself because it changes the effect of the exposure of interest when it is included in the model, or because it is a confounder only when included with other covariates. ... Better strategies than P value driven approaches for selecting variables are those that use external clinical judgment."

The problem with the algorithm in the first sentence of previous quotation has already been pointed out many times [1-3]. In Kenneth J. Rothman's "Epidemiology: An Introduction" [4], the author said, "The two primary ones (purposes) being to make predictions and to control for confounding." This algorithm ignores the true associated factor whose apparent association is weakened by confounding in univariate analysis, which is not reasonable for any purpose. However, although it is just personal

1  
2  
3  
4  
5 experience as statistical consultants, we receive many questions like, "Only variables  
6 that were significant in univariate analysis are included in multivariate analysis,  
7 right?"  
8

9  
10  
11 Knowing in what situations such inappropriate analysis is being done should lead to  
12 improvement in the quality of statistical analysis in medical research. However, there  
13 are no reports that summarize how multivariate analysis is carried out, including  
14 whether medical statistical experts are involved or not.  
15

16  
17  
18 Based on the above situation, we decided to investigate under what circumstances  
19 inappropriate use is likely to occur and to identify the population that needs more  
20 support. Since inappropriate use of multivariate analysis (particularly in variable  
21 selection for regression model construction) is found even in published papers, we  
22 investigated its frequency and related factors in publications. Considering the feasibility,  
23 time constraints, and difficulty in the survey, we examined the following items as  
24 outcomes: 1) using only variables that were significant in univariate analysis, 2) using  
25 too many explanatory variables for few events. Additionally, as a desirable multivariate  
26 analysis method, we also investigated whether several models were fitted for the same  
27 outcome and selected factors.  
28  
29  
30  
31

32  
33 Many other things should be considered in multivariate analysis such as association of  
34 events with variables, premises on distribution of variables, and correlation between  
35 explanatory variables. Therefore, knowledge of both medical science and biostatistics is  
36 necessary to enable appropriate understanding of statistical models. We therefore  
37 assessed the association between medical statistics expert involvement (such as  
38 biostatistician and epidemiologist) and the outcomes. Based on this research, we found  
39 a high-risk population in the implementation of multivariate analysis and suggest  
40 improvement measures.  
41  
42  
43  
44  
45

## 46 **2. Materials and methods**

### 47 **2.1. Selection of applicable journals and publications**

48  
49 This study was conducted as a cross-sectional study. Here, target publications in this  
50 study are about medical research undertaking multivariate analysis. To target  
51 publications with various qualities and properties, a multistep sampling method was  
52 applied as described below. Briefly, we first selected scientific journals dealing with  
53 clinical medicine and epidemiology and then we sampled individual publications. Also,  
54  
55  
56  
57  
58  
59

1  
2  
3  
4  
5 for "multivariate analysis," we chose logistic regression and Cox regression which are  
6 frequently performed in medical research. Details are as follows:

- 7  
8 1) Journals were selected from the journals listed in Thomson Reuter's Journal  
9 Citation Report. We first selected 45 medical research fields including 609 journals  
10 from the list in the website in 2014 ("JCR year" was 2013). Selected research fields  
11 were listed in Supplementary Table 1.  
12  
13 2) With simple sampling, many journals with a small number of citations could be  
14 selected. Therefore, sampling was stratified by the impact factor which is an  
15 indicator directly reflecting citation frequency. The journals were classified into the  
16 following four layers according to the impact factor: "<2 (less than 2)," "2-<4 (two to  
17 less than 4)," "4-<6 (four to less than 6)," and "6< (more than 6)."  
18  
19 3) Subsequently, we selected journals whose number of articles exceeds 200 / year to  
20 avoid journals with few articles and extracted all journals with impact factor of 6 or  
21 more (71 journals). The sampling rates of other strata were set to extract the same  
22 number ( $71 \times 4 = 284$  journals, listed in Supplementary Table 2). Sampling rates  
23 according to impact factor were: over 6: 100%, 4-6: < 55.5%, 2-4: < 27.8%, and under  
24 2: 45.8%. Journals selected for the investigation in this study are listed with this  
25 information in Supplementary Table 2.  
26  
27 4) We searched for publications in which logistic regression / Cox regression was  
28 performed from selected journals in PubMed (within the past 5 years: 2011-2015).  
29 The search terms were "logistic + XXXX (journal name)" for logistic regression, and  
30 "hazard + XXXX (journal name)" for Cox regression, respectively. A publication  
31 database with 4086 (for logistic) and 11726 (for Cox) publications was constructed  
32 through the previously described process. Clinical trials were excluded when the  
33 word "random" or "trial" was included in the title or abstract. Meta-analysis was  
34 also excluded when the word "meta-analysis" was included in the title or abstract.  
35 All publications were from journals available through the University of Tokyo or  
36 open access articles.  
37  
38 5) To set the 95% confidence interval to the range of  $\pm 3\%$ , the target number of  
39 publications was 1200. To limit selection bias from choosing journals with many  
40 publications with multivariate analysis, the sampling rate was calculated by  
41 applying a power function with an exponent < 1 to the number of publications (for  
42 logistic regression:  $0.34 \cdot N^{0.644}$ , for Cox regression:  $0.54 / N^{0.644}$ , N: the number of  
43 publications in each journal).  
44  
45 6) Ineligible publications that could not be excluded by the above steps were excluded  
46 afterwards, and 571 papers (for logistic) and 541 (for Cox) were selected as the  
47  
48  
49  
50  
51  
52  
53  
54  
55  
56  
57  
58  
59  
60

research subject. This number satisfies the target confidence interval set above.

## 2.2. Surveillance

The following information was collected from sampled publications by research assistants with knowledge of statistical analysis: affiliation of authors, country of the first author, method of variable selection for multivariate analysis (the primary outcome described below), number of the events (for multivariate analysis, categorized as: <math>-20</math>, <math>21-50</math>, <math>51-100</math>, and <math>101-</math>), number of the covariates (categorized as: <math>-2</math>, <math>3-5</math>, <math>6-10</math>, <math>11-</math>), etc. We decided whether authors or co-authors have expertise in biostatistics or epidemiology based on their affiliation. When the affiliation includes the following terms or related terms: epidemiology, public health, prevention, nutrition, social health, community health, occupational health, environmental health, population, global health, nutrition, biostatistics, statistics, mathematics, and clinical research, the author was considered a medical statistics expert (hereinafter, sometimes simply referred to as “expert”) in this research. Affiliation and the outcomes were independently collected by different assistants to avoid affecting determination of their association. For outcome-specific (not research-specific) information such as the number of events and the number of covariates, basically the information on the primary endpoint was collected, and if not applicable, information on the multivariate analysis first appearing in the abstracts or results was collected.

Since studies with few events (the number of events was 100 or less at the preliminary review) often included inappropriate analyses, the first author confirmed careful collection of information for such studies. In addition, the outcome of “Fitting several models for the same outcome and selected factors” was surveyed by the first author. In this surveillance, for the studies where the number of events exceeds 100, because the number is extremely large, validation was carried out by 30% sampling.

## 2.3. Outcomes

All outcomes were defined as surrogates for the quality of multivariate analysis. The following were considered as inappropriate/desirable algorithms.

1. “Using only variables that were significant in univariate analysis” is the primary outcome for this study, which means that all variables screened with statistical significance in univariate analyses were automatically entered without manual selection of variables and without consideration for the relevance of variables. This includes cases when it is written as such in the method section or it is obvious that it was implemented as such from expression of the tables. It is excluded from the

1  
2  
3  
4  
5 event when variables were manually added or removed due to relevance to outcomes  
6 (such as a factor of interest or an established risk factor) or statistical consideration  
7 (such as multiple collinearity) after the screening in univariate analysis. However, it  
8 is not excluded when the stepwise method such as backward elimination method is  
9 only applied algorithmically for *post hoc* variable selection.  
10

- 11  
12 2. “Using too many explanatory variables for few events” is one of the secondary  
13 outcomes. This outcome was investigated only when the number of events for  
14 individual publication was equal to 50 or less and if the number of covariates was  
15 over 11 when the number of events was equal to 50 or less or the number of  
16 covariates was over 5 when the number of events was equal to 20 or less. The  
17 criterion was basically based on the study from Peduzzi et al. [5, 6], but because  
18 defining the exact number of events and covariates is sometimes very difficult, we  
19 relaxed that criterion; outcomes were taken only when the number of events is less  
20 than 50 and the number of covariates exceeds 20% of the number of events.  
21
- 22 3. “Fitting several models for the same outcome and selected factors” was determined  
23 as a desirable outcome for multivariate analysis. It was defined as the event only if  
24 tables were included for multiple models (because of screening efficiency). A  
25 representative example of this outcome was a fixed outcome and factors of interest  
26 related to various adjustment of covariates such as “adjustment for age,” “age + sex,”  
27 “age + sex + other important factors,” etc. Subgroup analysis and analysis on  
28 different outcomes are not included in this outcome.  
29  
30  
31  
32  
33  
34  
35

36 Of course, there are many other points to be considered in multivariate analysis, such  
37 as multiple collinearity and use of intermediate variables, but these were not included  
38 at this time because it is difficult to gather information from publications from various  
39 research areas.  
40  
41  
42

#### 43 **2.4. Statistical analyses**

44 Statistical analyses for binomial outcomes were performed using weighted generalized  
45 estimating equation (distribution = binomial, link = logit) with robust variance. Weight  
46 was basically defined as the inverse of the following formula: sampling rate stratified by  
47 impact factor \* sampling rate based on the number of each journal (investigated /  
48 published). The correlation coefficient weighted by the number of publications was  
49 calculated using a general linear model. All statistical analyses were performed using  
50 SPSS 23 (IBM).  
51  
52  
53  
54  
55  
56  
57  
58  
59  
60

## 2.5. Patient and Public involvement

Neither were involved.

## 3. Results

### 3.1. Characteristics of investigated publications

The flow chart of the selection of the research subjects is summarized in Figure 1. An outline of the investigated publications is shown in Table 1 (total number was 1112). Most of the studies were large-scale research that exceeded 100 events. Publication whose first author is an expert in medical statistics is estimated to be 33.5% of the total, and in the remaining 67.7%, the proportion of publications in which an expert was included in co-authors was estimated to be 37.8%.

### 3.2. Descriptive statistics of the outcomes

Descriptive statistics of the outcomes are summarized in Table 2. The primary outcome of our research, "Using only variables that were significant in univariate analysis" was estimated to occur in 6.4% (95%CI: 4.8-8.5%) of the overall publications. There was a big difference depending on whether an expert was the first author or not. It was observed in only 1.1% of the publications with the involvement of an expert as the first author, 12.2% if experts were not involved, and 3.5% if an expert was included as co-author. When an expert was included as the first author or co-author, it was 2.1%.

"Using too many explanatory variables for few events" was observed in 17.4% of the total, 19.0% if the first author is an expert, 22.1% if experts were not involved, and 11.5% if an expert was included as co-author. Since these are only for research with few events, the estimation accuracy was low. When an expert was included as the first author or co-author, it was 13.6%.

Regarding the preferred outcome, "Fitting several models for the same outcome and selected factors," like the primary outcome, the result greatly differed depending on whether the first author was an expert or not. If the first author is an expert, the preferred outcome was achieved 30.7% of the time. Otherwise, only 7.3% is achieved if the co-authorship did not contain experts, and 19.0% if an expert was included. In the case in which an expert was included as the first author or co-author, it was 26.2%. This outcome does not overlap with the algorithm "using only variables that are significant in univariate analysis" in which only one model was created for model selection. As can be seen from the above results, when the authors included an expert, preferable analysis was carried out more frequently.



### 3.3. Subgroup analysis

Subsequently, the association between the number of events and the impact factor in each publication and the outcomes were assessed. As shown in Table 3, unfavorable results are observed in publications with fewer events and in journals with lower impact factors, independently from involvement of experts. In particular, where the number of cases was 50 or less and the study did not include experts, inappropriate multivariate analysis was observed with a high proportion of 20.2%. At the same time, "fitting several models" was implemented at a low proportion of 2.1%. When the impact factor is under 2 in studies in which experts were not involved, similar results have been observed (30.6% for the former, and 4.0% for the latter).

### 3.4. Further analysis for the association between involvement of experts in medical statistics and the quality of multivariate analysis

We assessed the association between the involvement of experts and the outcomes by adjusting for the two factors stratified above (Table 4). As a result, the odds ratio of the involvement of experts for "using only variables that are significant in univariate analysis" was 0.28 (95%CI: 0.15-0.53) which can be interpreted to be a large risk reduction.

If an expert was involved as the first author in the publication, the paper is expected to be an epidemiological study, and there should be an influence due to the difference in research characteristics on the result. If the first author is not an expert, the research could be a non-epidemiological research such as clinical research, and we focused on how much improvement could be seen by involving an expert in these studies. As a result, even when an expert was involved only as a co-author, the risk decreased with an odds ratio of 0.42 (95%CI: 0.19-0.97). Likewise, for "Fitting several models for the same outcome and selected factors," the result was favorable when an expert was included (OR 3.51. 95% CI: 1.88-6.58 for as any type of author, OR 2.36 for only as co-author, 95% CI: 1.03 - 5.38).

### 3.5. Nation-level investigation

Finally, we examined how much medical statistics experts are involved as co-authors when the first author is not an expert and its association with "using only variables that are significant in univariate analysis" for each country (of the first author).

First of all, 45% of all papers are reports from the United States, accounting for an overwhelming majority compared to other countries (Table 5). As shown in Figure 2, the correlation coefficients (weighting the number of publications) of "Proportion of

1  
2  
3  
4  
5 publications with medical statistics experts as co-author within publications in which  
6 the first author is not an expert” with “proportion of publications with multivariate  
7 analysis using only variables that were significant in univariate analysis without  
8 manual selection of variables” showed an inverse correlation with  $R = -0.652$ . In this  
9 analysis, countries with more than 10 publications in which the first author is not an  
10 expert were used. North America and Northern Europe show relatively high expert  
11 involvement proportion, whereas East Asia has a low level of 20% or less except for  
12 Taiwan. For other European countries, there is variability in the result. The  
13 involvement of experts and the implementation of unfavorable multivariate analysis  
14 are associated at the nation-level analysis. The details are summarized in Table 5.  
15  
16  
17  
18  
19

#### 20 21 **4. Discussion**

22 In this study, we focused on the algorithm called "use only variables that were  
23 significant in univariate analysis" as the inappropriate outcome which is often  
24 implemented mechanically without considering the influence of confounding and the  
25 relationship between variables. The result of 6.4% for this outcome was less than our  
26 expectation. However, considering that those who consult with us are "clinicians who  
27 conduct small-scale observational research (in Japan)," which was detected as a risk  
28 factor in this research, the research results are consistent with the expectation.  
29  
30  
31  
32

33 The reason why they adopt these methods seems to be based on the following ideas.

- 34 - Regarding statistical significance as sacred: this has become a problem in recent  
35 years, a statement concerning abuse of P value from American Statistical  
36 Association (ASA) was issued [7].
- 37 - Placing emphasis on being statistically “independent”: some researchers think that  
38 inclusion of a factor is totally meaningless unless the factor of interest is associated  
39 with their outcome independently of any included variables.
- 40 - Thinking that not using significant variables in univariate analysis is considered  
41 arbitrary, and using non-significant variables in univariate analysis is also  
42 considered arbitrary.  
43  
44  
45  
46  
47  
48

49 Here, suppose adjuvant chemotherapy for a hypothetical cancer is performed frequently  
50 for cases with lymph node metastasis with strong association with recurrence. Although  
51 this adjuvant chemotherapy has the effect of preventing recurrence, univariate analysis  
52 shows weaker association than actual due to confounding by lymph node metastasis.  
53 However, with appropriate adjustment for lymph node metastasis, a significant inverse  
54  
55  
56  
57  
58  
59  
60

1  
2  
3  
4  
5 association was observed between the adjuvant chemotherapy with recurrence (example  
6 shown in Supplementary Table 3). If you apply an algorithm of using only variables that  
7 were significant in univariate analysis, the actual effect of adjuvant chemotherapy  
8 would be overlooked. Also, to investigate how confounding occurs in detail, it is  
9 necessary to create multiple models, and stratified analyses are very useful  
10 (Supplementary Table 4).  
11  
12  
13

14  
15 Variable selection for regression model construction is a critical problem in clinical  
16 studies with small sample sizes where it is unclear which factors should be adjusted. In  
17 such situations, variable selection dependent on P value in univariate analysis might be  
18 performed. Even though the number of covariates that can be entered at the same time  
19 is limited due to few events, a multifaceted approach such as fitting several models  
20 should be helpful for causal interpretation. This is what we studied as a desirable  
21 outcome in this paper. For example, adjustments are made in multiple steps, such as  
22 crude (no adjustment) for model 1, age + sex for model 2, age + sex + another important  
23 factor A for model 3, and age + sex + another important factor B for model 4. However,  
24 this step was tended to be omitted in publications with fewer events (Table 3).  
25 Statistical multiplicity could be a problem with multiple models; however, we consider  
26 that it is not necessarily a severe problem because results from this approach are not  
27 independent and are highly correlated. Such sensitivity analysis with various statistical  
28 approaches is publicly recommended in clinical trials and analysis with missing data [8,  
29 9].  
30  
31  
32  
33  
34  
35

36 Considering that multiple models are not created despite a small number of  
37 events and inappropriate analysis is often observed in a paper with a low impact factor,  
38 the reason why only significant variables are used is not caused only by the number of  
39 events, but by problems of the research system (including the absence of experts). In  
40 addition, the level of requirement from journals and the quality of peer review may be  
41 responsible.  
42  
43  
44  
45

46 Since medical and social influence from research is very large, and fair research  
47 performance is required, participation of biostatisticians is essential in clinical trials.  
48 However, ideally, experts should always participate in research even in observational  
49 studies because of the difficulty of appropriate adjustment for confounding including  
50 multivariate analysis. Even observational research can seriously affect clinical practice  
51 guidelines.  
52  
53  
54  
55  
56  
57  
58  
59  
60

1  
2  
3  
4  
5 Based on the results of this study, the benefit of participation of medical statistics  
6 experts is obvious. Our results suggested that the proportion of experts' involvement is  
7 low in publications from East Asia, and there are relatively few publications in which  
8 the first author is an expert (Table 5). This would mean a shortage of such experts in  
9 these countries. The surveillance in 2011 by McKinsey Global Institute demonstrated  
10 that there are only a small number of graduates with statistical training (including  
11 biostatistics) in Japan and China (2.66 and 1.31 graduates per 100 people in 2008, while  
12 8.11, 13.58 and 12.47 for the United States, the United Kingdom, and France,  
13 respectively) [10]. The shortage of biostatisticians has been considered a problem in  
14 Japan, but infrastructure for training and developing biostatisticians has been  
15 developed rapidly in recent years [11].  
16  
17  
18  
19  
20  
21

22 However, it takes a long time to develop enough well-trained experts. In situations with  
23 a lack of medical statistics experts, it should be advisable to establish a system to  
24 disclose the data used for publication to enable the data to be analyzed (including  
25 multivariate analysis) by external experts as part of the peer review process. Here,  
26 "external" includes foreign experts or experts who are not acquainted personally with  
27 the research team. For new drug applications, researchers are obliged to submit the  
28 dataset of clinical trial standardized by the CDISC standard to regulatory authorities  
29 (Food and Drug Administration: FDA, Pharmaceuticals and Medical Devices Agency:  
30 PMDA, etc.) for further validation and additional analysis. Such standardization should  
31 be a model in constructing the system as described above.  
32  
33  
34  
35

36 Since clinicians performing clinical research are not necessarily full-time  
37 researchers and are usually very busy, they are the population that needs more support  
38 for medical statistics. In particular, those who are not involved in a huge research  
39 project (like a large epidemiological study) have difficulty accessing medical statistics  
40 experts. It is desirable to establish a support system for them within the peer review  
41 step regardless of the impact factor of the journal.  
42  
43  
44  
45

#### 46 **4.1. Limitations**

- 47 1) Large-scale research was dominant in the study papers; the number of small-scale  
48 research in which there are possibly many problems was limited. Although it may  
49 have been sampled according to the number of events, it is difficult to extract that  
50 information by search words.  
51
- 52 2) Since the definition of outcome is complicated, there are many possibilities of  
53 misclassification. Therefore, the reliability may be higher in the examination of the  
54  
55  
56  
57  
58  
59  
60

1  
2  
3  
4  
5 relative difference rather than absolute values.

- 6 3) The number of factors related to the quality of multivariate analysis are far more  
7 than those examined in this study.  
8  
9 4) Even papers we classify under the undesirable outcome may not necessarily use an  
10 inappropriate form of multivariate analysis. For example, when the purpose of  
11 multivariate analysis is to construct a predictive model, there is no problem if a  
12 model with high predictive power is finally created. Our three outcomes should then  
13 be considered as “potentially inappropriate” / “desirable” use of multivariate  
14 analysis.  
15  
16  
17  
18

#### 19 **4.2. The controversy about the term “multivariate/univariate”**

20 The term "multivariable/univariable analysis" instead of "multivariate/univariate  
21 analysis" is sometimes recommended for regression analyses because "variate" means  
22 random variable [12]. However, in most situations described as “multivariate analysis”,  
23 medical researchers’ intentions are clear: adjust for multiple covariates as explanatory  
24 variables in regression models. We therefore adopted "multivariate/univariate analysis"  
25 in this study as this usage is more common in today's medical literature [12]. See  
26 Supplementary Discussion for further details.  
27  
28  
29  
30  
31

#### 32 **4.3. Conclusion**

33 In publications about observational research in which the number of events is 50 or less  
34 without the involvement of medical statistics experts, more than 20% of publications  
35 may have problems in multivariate analysis. The involvement of experts was associated  
36 with desirable implementation of multivariate analysis independently of the number of  
37 events and the impact factor. The benefit of participation of medical statistics experts in  
38 the study is obvious. Since even observational research can be a source of important  
39 evidence in medical science, experts should be involved for proper confounding  
40 adjustment and interpretation of statistical models. We hope that this research will  
41 make medical researchers more cognizant of appropriate regression model construction  
42 in multivariate analysis.  
43  
44  
45  
46  
47  
48

#### 49 **Funding source**

50 This study was supported by Grants-in-Aid for Scientific research (C), JSPS KAKENHI  
51 grant Number JP 26460764 (Fiscal-year 2014-16, Masanori Nojima).  
52  
53

#### 54 **Competing interests**

55  
56  
57  
58  
59  
60

1  
2  
3  
4  
5 There are no competing interests.  
6  
7

### 8 **Author's contributions**

9 MN: Conception and design of the study, writing the manuscript, analysis and  
10 interpretation of data. MT: Acquisition and interpretation of data and critical revision of  
11 the manuscript. FN: Supervising the overall research and critical revision of the  
12 manuscript.  
13  
14  
15

### 16 **Acknowledgements**

17 I would like to thank a research assistant, Ms. Kasumi Okazaki, for collecting  
18 publications and detailed information. I would also like to thank a biostatistician, Dr.  
19 Tomohiro Shinozaki, for giving advanced statistical advice.  
20  
21  
22

### 23 **Data sharing statement**

24 No additional data are available.  
25  
26  
27

### 28 **References**

- 29 1. Bouwmeester W, Zuithoff NP, Mallett S, Geerlings MI, Vergouwe Y, Steyerberg EW,  
30 Altman DG, Moons KG: Reporting and methods in clinical prediction research: a  
31 systematic review. *PLoS Med* 2012;9:1-12
- 32 2. Sun GW, Shook TL, Kay GL: Inappropriate use of bivariable analysis to screen risk  
33 factors for use in multivariable analysis. *J Clin Epidemiol* 1996;49:907-16
- 34 3. Harrell FE Jr, Lee KL, Mark DB: Multivariable prognostic models: issues in  
35 developing models, evaluating assumptions and adequacy, and measuring and  
36 reducing errors. *Stat Med* 1996;15:361-87
- 37 4. Rothman KJ: *Epidemiology: An Introduction* / Kenneth J. Rothman. - 2nd ed.  
38 Oxford 2012
- 39 5. Peduzzi P, Concato J, Kemper E, Holford TR, Feinstein AR: A simulation study of  
40 the number of events per variable in logistic regression analysis. *J Clin Epidemiol*  
41 1996;49:1373-9
- 42 6. Peduzzi P, Concato J, Feinstein AR, Holford TR: Importance of events per  
43 independent variable in proportional hazards regression analysis. II. Accuracy  
44 and precision of regression estimates. *J Clin Epidemiol* 1995;48:1503-10
- 45 7. Wasserstein RL, Lazar NA: The ASA's Statement on p-Values: Context, Process,  
46 and Purpose *Am Stat* 2016;70:129-33
- 47 8. International Conference on Harmonisation E9 Expert Working Group: ICH  
48  
49  
50  
51  
52  
53  
54  
55  
56  
57  
58  
59  
60

- 1  
2  
3  
4  
5 Harmonised Tripartite Guideline. Statistical principles for clinical trials. *Stat Med*  
6 1999;18:1905-42  
7  
8 9. O'Neill RT, Temple R: The prevention and treatment of missing data in clinical  
9 trials: an FDA perspective on the importance of dealing with it. *Clin Pharmacol*  
10 *Ther* 2012;91:550-4  
11  
12 10. Manyika J, Chui M, Brown B, Bughin J, Dobbs R, Roxburgh C, Byers AH: Big data:  
13 The next frontier for innovation, competition, and productivity McKinsey Global  
14 Institute 2011  
15  
16 11. Carpenter J: How biostatistics is of rapidly growing importance in Japan *Statistics*  
17 *Views* 2013  
18  
19 12. Hidalgo B, Goodman M. Multivariate or multivariable regression? *Am J Public*  
20 *Health*. 2013;103:39-40  
21  
22

### Figure legends

23  
24 Figure 1. Summary of the selection of publications investigated in this study.

25  
26 Figure 2. A scatter plot for the correlation between the proportion of publications using  
27 an inappropriate algorithm in multivariate analysis and the proportion of publications  
28 in which medical statistics experts were included as co-authors. Inappropriate use of  
29 multivariate analysis and presence of experts are inversely correlated.  
30  
31  
32  
33  
34  
35  
36  
37  
38  
39  
40  
41  
42  
43  
44  
45  
46  
47  
48  
49  
50  
51  
52  
53  
54  
55  
56  
57  
58  
59  
60

Table 1. Characteristics of publications investigated in this study.

|                                               |              | Number of publications<br>(N = 1112) | %     |       |
|-----------------------------------------------|--------------|--------------------------------------|-------|-------|
| The number of events                          | <21          | 47                                   | 4.2%  |       |
|                                               | 21-50        | 122                                  | 11.0% |       |
|                                               | 51-100       | 96                                   | 8.6%  |       |
|                                               | 100<         | 847                                  | 76.2% |       |
| Impact factor                                 | Under 2      | 127                                  | 11.4% |       |
|                                               | 2-4<         | 160                                  | 14.4% |       |
|                                               | 4-6<         | 397                                  | 35.7% |       |
|                                               | Over 6       | 428                                  | 38.5% |       |
| Medical statistics experts<br>are included as | First author | Co-author                            |       |       |
|                                               | No           | No                                   | 418   | 37.6% |
|                                               | No           | Yes                                  | 321   | 28.9% |
|                                               | Yes          | Either                               | 373   | 33.5% |



Table 2. Estimated proportions of publications using inappropriate/desirable algorithms in multivariate analysis stratified by whether medical statistics experts were included as author or not.

| Outcomes                                                            | Proportion                                 | 95%CI     |       |
|---------------------------------------------------------------------|--------------------------------------------|-----------|-------|
|                                                                     |                                            | Lower     | Upper |
| 1. Using only significant variables in univariate analysis          | 6.4%                                       | 4.8%      | 8.5%  |
| Subgroup analysis                                                   | Medical statistics experts are included as |           |       |
|                                                                     | First author                               | Co-author |       |
|                                                                     | No                                         | No        | 12.2% |
|                                                                     | No                                         | Yes       | 3.5%  |
|                                                                     | Yes                                        | Either    | 1.1%  |
|                                                                     | 1st author or co-author                    |           | 2.1%  |
| 2. Using too many covariates for few events                         | 17.4%                                      | 10.2%     | 28.0% |
| Subgroup analysis                                                   | Medical statistics experts are included as |           |       |
|                                                                     | First author                               | Co-author |       |
|                                                                     | No                                         | No        | 22.1% |
|                                                                     | No                                         | Yes       | 11.5% |
|                                                                     | Yes                                        | Either    | 19.0% |
|                                                                     | First author or co-author                  |           | 13.6% |
| 3. Fitting several models for the same outcome and selected factors | 14.4%                                      | 11.1%     | 18.3% |
| Subgroup analysis                                                   | Medical statistics experts are included as |           |       |
|                                                                     | First author                               | Co-author |       |
|                                                                     | No                                         | No        | 7.3%  |
|                                                                     | No                                         | Yes       | 19.0% |
|                                                                     | Yes                                        | Either    | 30.7% |
|                                                                     | First author or co-author                  |           | 26.2% |

Table 3. Estimated proportions of publications using inappropriate/desirable algorithms in multivariate analysis stratified by the number of events, impact factor, and whether medical statistics experts were included as author or not.

| Subgroup                                                         |                       | Using only significant variables in univariate analysis |       |       | Fitting several models for the same outcome and selected factors |       |       |
|------------------------------------------------------------------|-----------------------|---------------------------------------------------------|-------|-------|------------------------------------------------------------------|-------|-------|
|                                                                  |                       | Proportion                                              | 95%CI |       | Proportion                                                       | 95%CI |       |
|                                                                  |                       |                                                         | Lower | Upper |                                                                  | Lower | Upper |
| Medical statistics experts included as first author or co-author | The number of events* |                                                         |       |       |                                                                  |       |       |
| No                                                               | <51                   | 20.2%                                                   | 12.5% | 31.1% | 2.1%                                                             | 0.7%  | 5.9%  |
|                                                                  | 51-100                | 9.4%                                                    | 3.2%  | 24.7% | 3.2%                                                             | 1.1%  | 8.6%  |
|                                                                  | 100<                  | 8.6%                                                    | 5.1%  | 14.2% | 10.7%                                                            | 6.3%  | 17.7% |
| Yes                                                              | <51                   | 7.7%                                                    | 2.9%  | 18.9% | 12.6%                                                            | 5.0%  | 28.2% |
|                                                                  | 51-100                | 4.0%                                                    | 1.2%  | 13.0% | 30.1%                                                            | 16.5% | 48.6% |
|                                                                  | 100<                  | 1.6%                                                    | 0.8%  | 3.2%  | 27.0%                                                            | 20.6% | 34.6% |
| Medical statistics experts included as first author or co-author | Impact factor         |                                                         |       |       |                                                                  |       |       |
| No                                                               | Under 2               | 30.6%                                                   | 17.1% | 48.4% | 4.0%                                                             | 1.1%  | 13.7% |
|                                                                  | 2-4<                  | 6.5%                                                    | 2.4%  | 16.3% | 3.4%                                                             | 0.8%  | 13.1% |
|                                                                  | 4-6<                  | 10.8%                                                   | 5.8%  | 19.2% | 11.7%                                                            | 6.1%  | 21.5% |
|                                                                  | Over 6                | 12.9%                                                   | 7.5%  | 21.1% | 9.0%                                                             | 4.2%  | 18.4% |
| Yes                                                              | Under 2               | 6.0%                                                    | 1.9%  | 17.2% | 16.2%                                                            | 5.4%  | 39.6% |
|                                                                  | 2-4<                  | 3.1%                                                    | 1.1%  | 8.6%  | 22.8%                                                            | 10.5% | 42.6% |
|                                                                  | 4-6<                  | 0.2%                                                    | 0.0%  | 1.1%  | 23.7%                                                            | 16.1% | 33.5% |
|                                                                  | Over 6                | 3.5%                                                    | 1.7%  | 6.9%  | 35.5%                                                            | 25.9% | 46.4% |

\*The category of "<21" has been integrated with the category "21 - 50" because of insufficient numbers

1  
2  
3  
4  
5  
6  
7  
8  
9  
10  
11  
12  
13  
14  
15  
16  
17  
18  
19  
20  
21  
22  
23  
24  
25  
26  
27  
28  
29  
30  
31  
32  
33  
34  
35  
36  
37  
38  
39  
40  
41  
42  
43  
44  
45  
46  
47

Table 4. The assessment of the association between the absence of medical statistics experts and the use of inappropriate/desirable algorithms in multivariate analysis with adjustment for potential confounders.

| Factor                                                                                                                    | Using only significant variables in univariate analysis |       |       | Fitting several models for the same outcome and selected factors |       |       |
|---------------------------------------------------------------------------------------------------------------------------|---------------------------------------------------------|-------|-------|------------------------------------------------------------------|-------|-------|
|                                                                                                                           | Odds ratio                                              | 95%CI |       | Odds ratio                                                       | 95%CI |       |
|                                                                                                                           |                                                         | Lower | Upper |                                                                  | Lower | Upper |
| Medical statistics experts included as first author or co-author (vs. no experts)                                         | 0.28                                                    | 0.15  | 0.53  | 3.51                                                             | 1.88  | 6.58  |
| Medical statistics experts included as first author or co-author (vs. no experts) when 1st author is clinicians or others | 0.42                                                    | 0.19  | 0.97  | 2.36                                                             | 1.03  | 5.38  |

All models were adjusted for impact factor and the number of events.

Table 5. Summary of each country and proportion of publications in which medical statistics experts were included as co-author within the publications in which the first author is not an expert in these fields.

| Country      | Total number of publications | Occupancy (%) | Publications in which the first author is NOT a medical statistics expert (%) | Estimates   |             |
|--------------|------------------------------|---------------|-------------------------------------------------------------------------------|-------------|-------------|
|              |                              |               |                                                                               | Proportion* | 95%CI*      |
| USA          | 501                          | 45.1          | 67.9                                                                          | 47.4        | (40-54.9)   |
| UK           | 63                           | 5.7           | 48.2                                                                          | 22.0        | (9.6-42.7)  |
| China        | 51                           | 4.6           | 84.5                                                                          | 6.7         | (2.5-17.1)  |
| Canada       | 48                           | 4.3           | 67.4                                                                          | 50.7        | (31.5-69.6) |
| Netherlands  | 46                           | 4.1           | 73.1                                                                          | 37.4        | (18.3-61.5) |
| Japan        | 45                           | 4.0           | 81.2                                                                          | 15.3        | (6.8-30.9)  |
| South Korea  | 39                           | 3.5           | 79.5                                                                          | 14.3        | (4.9-35.1)  |
| Sweden       | 38                           | 3.4           | 40.0                                                                          | 45.3        | (22.7-70)   |
| Taiwan       | 29                           | 2.6           | 91.3                                                                          | 38.8        | (19.1-62.9) |
| Germany      | 27                           | 2.4           | 80.1                                                                          | 41.7        | (21.9-64.6) |
| Denmark      | 26                           | 2.3           | 55.4                                                                          | 48.9        | (23.9-74.5) |
| Italy        | 25                           | 2.2           | 71.4                                                                          | 13.6        | (4.1-36.3)  |
| Australia    | 25                           | 2.2           | 42.5                                                                          | 50.6        | (16.4-84.3) |
| France       | 21                           | 1.9           | 57.5                                                                          | 77.7        | (46.5-93.3) |
| Spain        | 19                           | 1.7           | 62.6                                                                          | 32.7        | (11.8-63.8) |
| Brazil       | 13                           | 1.2           | 51.1                                                                          | 4.6         | (0.6-29.3)  |
| Norway       | 11                           | 1.0           | 48.4                                                                          | 44.8        | (9.7-86)    |
| Finland      | 8                            | 0.7           | 85.8                                                                          |             |             |
| Switzerland  | 8                            | 0.7           | 39.6                                                                          |             |             |
| Israel       | 7                            | 0.6           | 60.9                                                                          |             |             |
| Singapore    | 6                            | 0.5           | 92.8                                                                          |             |             |
| Belgium      | 6                            | 0.5           | 64.8                                                                          |             |             |
| Turkey       | 5                            | 0.4           | 100                                                                           |             |             |
| Austria      | 4                            | 0.4           | 100                                                                           |             |             |
| South Africa | 4                            | 0.4           | 57.4                                                                          |             |             |
| Kenya        | 4                            | 0.4           | 11.5                                                                          |             |             |
| Poland       | 3                            | 0.3           | 100                                                                           |             |             |
| India        | 3                            | 0.3           | 76.3                                                                          |             |             |
| Thailand     | 3                            | 0.3           | 31.3                                                                          |             |             |
| Iran         | 3                            | 0.3           | 34.2                                                                          |             |             |
| Greece       | 2                            | 0.2           | 82.9                                                                          |             |             |
| Ireland      | 2                            | 0.2           | 32.4                                                                          |             |             |
| Others       | 17                           | 3.4           | 47.4                                                                          |             |             |
| Overall      | 1112                         | 100           | 67.3                                                                          | 39.0        | (32.2-45.4) |

\*Calculated only for countries with publications more than 10.

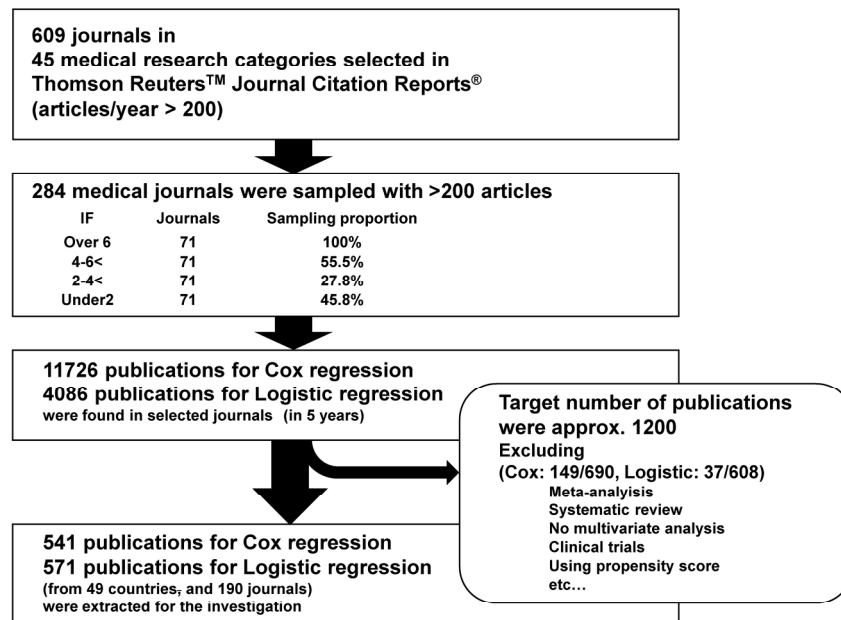

28  
29  
30  
31  
32  
33  
34  
35  
36  
37  
38  
39  
40  
41  
42  
43  
44  
45  
46  
47  
48  
49  
50  
51  
52  
53  
54  
55  
56  
57  
58  
59  
60

**Figure 1.**

Summary of the selection of publications investigated in this study.

190x142mm (300 x 300 DPI)

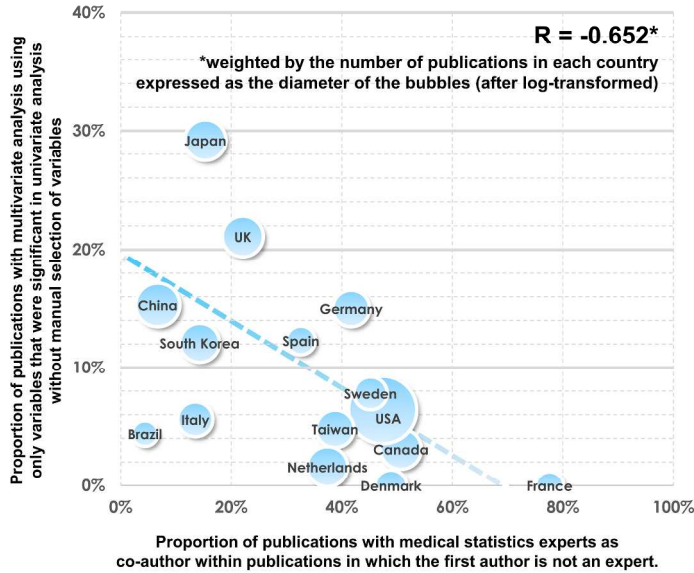

**Figure 2.**

A scatter plot for the correlation between the proportion of publications using an inappropriate algorithm in multivariate analysis and the proportion of publications in which medical statistics experts were included as co-authors. Inappropriate use of multivariate analysis and presence of experts are inversely correlated.

254x338mm (300 x 300 DPI)

## Supplementary Table 1. Selected research filed in Thomson Reuter's Journal Citation Report (version 2014)

---

1 ALLERGY  
2  
3 ANESTHESIOLOGY  
4  
5 CARDIAC & CARDIOVASCULAR SYSTEMS  
6  
7 CLINICAL NEUROLOGY  
8  
9 CRITICAL CARE MEDICINE  
10  
11 DENTISTRY, ORAL SURGERY & MEDICINE  
12  
13 DERMATOLOGY  
14  
15 EMERGENCY MEDICINE  
16  
17 ENDOCRINOLOGY & METABOLISM  
18  
19 ENVIRONMENTAL SCIENCES  
20  
21 GASTROENTEROLOGY & HEPATOLOGY  
22  
23 GERIATRICS & GERONTOLOGY  
24  
25 HEALTH CARE SCIENCES & SERVICES  
26  
27 HEMATOLOGY  
28  
29 IMMUNOLOGY  
30  
31 INFECTIOUS DISEASES  
32  
33 INTEGRATIVE & COMPLEMENTARY MEDICINE  
34  
35 MEDICINE, GENERAL & INTERNAL  
36  
37 MEDICINE, RESEARCH & EXPERIMENTAL  
38  
39 NEUROSCIENCES  
40  
41 NURSING  
42  
43 NUTRITION & DIETETICS  
44  
45 OBSTETRICS & GYNECOLOGY  
46  
47 ONCOLOGY  
48  
49 OPHTHALMOLOGY  
50  
51 ORTHOPEDICS  
52  
53 OTORHINOLARYNGOLOGY  
54  
55 PATHOLOGY  
56  
57 PEDIATRICS  
58  
59 PERIPHERAL VASCULAR DISEASE  
60  
PHARMACOLOGY & PHARMACY  
PSYCHIATRY  
PUBLIC, ENVIRONMENTAL & OCCUPATIONAL HEALTH  
RADIOLOGY, NUCLEAR MEDICINE & MEDICAL IMAGING  
REHABILITATION  
REPRODUCTIVE BIOLOGY  
RESPIRATORY SYSTEM  
RHEUMATOLOGY  
SURGERY  
TOXICOLOGY  
TRANSPLANTATION  
TROPICAL MEDICINE  
UROLOGY & NEPHROLOGY  
VIROLOGY  
SUBSTANCE ABUSE

---

Supplementary Table 2. Journals selected for the investigation in this study.

| 2013 impact factor   |                      |                      |                      |
|----------------------|----------------------|----------------------|----------------------|
| Over 6               | 4-<6                 | 2-<4                 | Under 2              |
| NEW ENGL J MED       | ENVIRON MODELL SOFTW | TOXICON              | TURK GOGUS KALP DAMA |
| LANCET               | PEDIATRICS           | J NEUROL SCI         | RENAL FAILURE        |
| JAMA-J AM MED ASSOC  | PSYCHO-ONCOLOGY      | AM J NEURORADIOL     | ENVIRON MONIT ASSESS |
| J CLIN ONCOL         | EXP NEUROL           | PHYTOTHER RES        | ZH NEVROL PSIKHIATR  |
| BMJ-BRIT MED J       | ALIMENT PHARM THER   | INT J TUBERC LUNG D  | ANIM REPROD SCI      |
| NEURON               | PLOS NEGLECT TROP D  | J UROLOGY            | NEUROL SCI           |
| ENERG ENVIRON SCI    | AM J OBSTET GYNECOL  | AGR ECOSYST ENVIRON  | J EMERG MED          |
| J AM COLL CARDIOL    | AM J PATHOL          | EXP CELL RES         | ENVIRON TOXICOL PHAR |
| NAT NEUROSCI         | PAIN                 | DIABETES RES CLIN PR | BRAIN INJURY         |
| CIRCULATION          | INT J RADIAT ONCOL   | OBES SURG            | BMC PEDIATR          |
| EUR HEART J          | J AM MED INFORM ASSN | J VISION             | AM J MED SCI         |
| SCI TRANSL MED       | THROMB HAEMOSTASIS   | AM J INFECT CONTROL  | WATER SCI TECHNOL    |
| GASTROENTEROLOGY     | J THROMB HAEMOST     | ENVIRON TOXICOL CHEM | J STROKE CEREBROVASC |
| J EXP MED            | ARTHRIT CARE RES     | DRUG ALCOHOL DEPEN   | CLINICS              |
| J CLIN INVEST        | EUR J CANCER         | ECOL ECON            | PROG UROL            |
| AM J RESP CRIT CARE  | AM J RESP CELL MOL   | BMC NEUROL           | ENVIRON SCI-PROC IMP |
| J ALLERGY CLIN IMMUN | PSYCHOL MED          | VIRUS RES            | J VIROL METHODS      |
| HEPATOLOGY           | BRIT J PHARMACOL     | BIOL REPROD          | BURNS                |
| CIRC RES             | AM J EPIDEMIOL       | EUR J GASTROEN HEPAT | J NEUROSCI METH      |
| J HEPATOL            | RESUSCITATION        | APPL CATAL A-GEN     | J ORAL MAXIL SURG    |
| NEUROSCI BIOBEHAV R  | MOVEMENT DISORD      | BREAST               | PAK J MED SCI        |
| BRAIN                | BIOCHEM PHARMACOL    | J NEURO-ONCOL        | INT J ORAL MAX IMPL  |
| BLOOD                | NEUROBIOL AGING      | SPINE J              | ANN VASC SURG        |
| BIOL PSYCHIAT        | AM J KIDNEY DIS      | EUR J PHARM SCI      | KARDIOL POL          |
| CLIN INFECT DIS      | J TRANSL MED         | TRANSPLANTATION      | J CARDIOTHOR VASC AN |
| LEUKEMIA             | GASTROINTEST ENDOSC  | J PHARMACEUT BIOMED  | CHINESE MED J-PEKING |
| CANCER RES           | HAEMATOLOGICA        | BMC PREGNANCY CHILDB | RHEUMATOL INT        |
| ANN RHEUM DIS        | RHEUMATOLOGY         | AM J TROP MED HYG    | B ENVIRON CONTAM TOX |
| DIABETES CARE        | PROG NEURO-PSYCHOPH  | J ENVIRON MANAGE     | SUSTAINABILITY-BASEL |
| ONCOGENE             | CLIN J AM SOC NEPHRO | TOXICOL IN VITRO     | BONE JOINT J         |
| KIDNEY INT           | J AM COLL SURGEONS   | MAGN RESON IMAGING   | INT J CLIN EXP PATHO |
| DIABETES             | J THORAC CARDIOV SUR | CORNEA               | FOOT ANKLE INT       |
| CEREB CORTEX         | AM J SURG PATHOL     | CHEMOSPHERE          | EUR J OBSTET GYN R B |
| NEUROLOGY            | REMOTE SENS ENVIRON  | GEN COMP ENDOCR      | ENVIRON MANAGE       |
| GLOBAL CHANGE BIOL   | J NUTR               | CLIN ORAL IMPLAN RES | INT J GYNECOL CANCER |
| CLIN CANCER RES      | OBESITY              | BRIT J OPHTHALMOL    | SURG TODAY           |
| PLOS PATHOG          | EUR RADIOL           | TOXICOL APPL PHARM   | ONCOL LETT           |
| ARTHRITIS RHEUM-US   | J AM ACAD DERMATOL   | AM J CARDIOL         | INTERNAL MED         |
| NEUROPSYCHOPHARMACOL | INT J OBESITY        | CLIN VACCINE IMMUNOL | J DRUGS DERMATOL     |
| ANTIOXID REDOX SIGN  | PHARM RES-DORDR      | SLEEP MED            | SKELETAL RADIOL      |
| HYPERTENSION         | J PHYSIOL-LONDON     | CLIN EXP RHEUMATOL   | PHARM BIOL           |
| EMERG INFECT DIS     | BIOL CONSERV         | MOL VIS              | PEDIATR EMERG CARE   |
| BMC MED              | ARTERIOSCL THROM VAS | J AM HEART ASSOC     | PEDIATR CARDIOL      |
| J CONTROL RELEASE    | ENVIRON POLLUT       | FOOD CHEM TOXICOL    | EMERG MED J          |
| ANN SURG             | J NEUROCHEM          | EUR J PHARMACOL      | J CRANIOFAC SURG     |
| STEM CELLS           | ATHEROSCLEROSIS      | ACTA TROP            | AM J EMERG MED       |
| CHEST                | HUM REPROD           | SPINE                | ANTICANCER RES       |
| EUR RESPIR J         | AM HEART J           | FRONT HUM NEUROSCI   | ACTA NEUROCHIR       |
| ENVIRON HEALTH PERSP | BREAST CANCER RES TR | MAGN RESON MED       | PEDIATR RADIOL       |
| HUM BRAIN MAPP       | J CEREBR BLOOD F MET | NEUROSCIENCE         | HEPATO-GASTROENTEROL |
| AM J CLIN NUTR       | FERTIL STERIL        | CURR MED CHEM        | J CLIN NEUROSCI      |
| DIABETOLOGIA         | CAN J CARDIOL        | J SEX MED            | ACTA PAEDIATR        |
| J NEUROSCI           | RADIOTHER ONCOL      | NUTRIENTS            | INDIAN J SURG        |
| J BONE MINER RES     | J AM GERIATR SOC     | NEPHROL DIAL TRANSPL | RESP PHYSIOL NEUROBI |
| ANN ONCOL            | TOXICOL SCI          | FRONT NEURAL CIRCUIT | DEUT MED WOCHENSCHR  |
| AIDS                 | BONE                 | PRENATAL DIAG        | J MATERN-FETAL NEO M |
| CLIN GASTROENTEROL H | LIVER INT            | J GEN INTERN MED     | INT J MED SCI        |
| MOL THER             | ENVIRON RES LETT     | ARTHROSCOPY          | INT J ENDOCRINOL     |
| J INVEST DERMATOL    | BRIT J ANAESTH       | INT J ONCOL          | OTOL NEUROTOL        |
| J CLIN ENDOCR METAB  | INFECT IMMUN         | ENVIRON SCI POLLUT R | INT J PEDIATR OTORHI |
| RADIOLOGY            | HEALTH AFFAIR        | TRIALS               | TERAPEVT ARKH        |
| AM J TRANSPLANT      | CANCER-AM CANCER SOC | INVEST OPHTH VIS SCI | ANZ J SURG           |
| INT J CARDIOL        | OSTEOPOROSIS INT     | ARCH VIROL           | J KOREAN MED SCI     |
| OPHTHALMOLOGY        | CANCER EPIDEM BIOMAR | AM J ROENTGENOL      | OR SURG OR MED OR PA |
| ANESTHESIOLOGY       | PSYCHOPHARMACOLOGY   | UROL ONCOL-SEMIN ORI | J OBSTET GYNAECOL    |
| CRIT CARE MED        | ADDICTION            | AM J PHYSIOL-GASTR L | IRAN J PUBLIC HEALTH |
| NEUROIMAGE           | NEUROPHARMACOLOGY    | QUAL LIFE RES        | OTOLARYNG HEAD NECK  |
| MOL CANCER THER      | INT J CANCER         | COLORECTAL DIS       | J PAEDIATR CHILD H   |
| CORTEX               | J NUTR BIOCHEM       | VIROL J              | BMC COMPLEM ALTERN M |
| HEART                | MOL CELL ENDOCRINOL  | WASTE MANAGE         | BRIT J ORAL MAX SURG |
| STROKE               | MOL PHARMACOL        | EUR J CLIN PHARMACOL | J ENVIRON SCI-CHINA  |



Supplementary Table 3. Example of multivariate analysis: logistic regression analysis for recurrence after surgery of hypothetical cancer with potential prognostic factors.

Univariate Analysis

| Potential prognostic factors | P value | Odds ratio | 95% Confidence Interval |       |
|------------------------------|---------|------------|-------------------------|-------|
|                              |         |            | Lower                   | Upper |
| Adjuvant chemotherapy        | 0.101   | 0.45       | 0.17                    | 1.17  |
| Lymph node metastasis        | <0.001  | 8.31       | 2.88                    | 24.00 |
| Biomarker positive           | <0.001  | 17.11      | 5.38                    | 54.39 |

Multivariate Analysis

| Potential prognostic factors                            | P value | Odds ratio   | 95% Confidence Interval |       | P value                                    | Odds ratio   | 95% Confidence Interval |       |
|---------------------------------------------------------|---------|--------------|-------------------------|-------|--------------------------------------------|--------------|-------------------------|-------|
|                                                         |         |              | Lower                   | Upper |                                            |              | Lower                   | Upper |
| Multivariate analysis 1                                 |         |              |                         |       | Multivariate analysis 2                    |              |                         |       |
| Using only significant variables in univariate analysis |         |              |                         |       | Using all potential prognostic factors     |              |                         |       |
| Adjuvant chemotherapy                                   |         | Not included |                         |       | 0.015                                      | 0.14         | 0.03                    | 0.69  |
| Lymph node metastasis                                   | 0.005   | 6.08         | 1.72                    | 21.51 | 0.001                                      | 12.60        | 2.67                    | 59.42 |
| Biomarker positive                                      | <0.001  | 13.77        | 3.99                    | 47.48 | <0.001                                     | 16.05        | 4.11                    | 62.69 |
| Multivariate analysis 3                                 |         |              |                         |       | Multivariate analysis 4                    |              |                         |       |
| Adjuvant chemotherapy + Lymph node metastasis           |         |              |                         |       | Adjuvant chemotherapy + Biomarker positive |              |                         |       |
| Adjuvant chemotherapy                                   | 0.013   | 0.18         | 0.05                    | 0.70  | 0.093                                      | 0.35         | 0.10                    | 1.19  |
| Lymph node metastasis                                   | <0.001  | 15.63        | 4.03                    | 60.61 |                                            | Not included |                         |       |
| Biomarker positive                                      |         | Not included |                         |       | <0.001                                     | 18.92        | 5.61                    | 63.89 |

Inappropriate conclusion about adjuvant chemotherapy:  
With multivariate analysis 1, adjuvant chemotherapy has no effect.

Desirable conclusion about adjuvant chemotherapy:  
With multivariate analyses 2 to 4, adjuvant chemotherapy was inversely associated with recurrence after adjustment for lymph node metastasis.  
Lymph node metastasis was a stronger confounder for the association between adjuvant chemotherapy and recurrence than the biomarker.

Supplementary Table 4. Cross-tabulation table for the association between adjuvant chemotherapy and recurrence stratified by lymph node metastasis for hypothetical cancer.

| Lymph node metastasis |                               | No recurrence |       | recurrence |       | Total  |
|-----------------------|-------------------------------|---------------|-------|------------|-------|--------|
|                       |                               | Number        | %     | Number     | %     | Number |
| Absent                | Without adjuvant chemotherapy | 22            | 73.3% | 8          | 26.7% | 30     |
|                       | With adjuvant chemotherapy    | 22            | 91.7% | 2          | 8.3%  | 24     |
|                       | Total                         | 44            | 81.5% | 10         | 18.5% | 54     |
| Present               | Without adjuvant chemotherapy | 1             | 10.0% | 9          | 90.0% | 10     |
|                       | With adjuvant chemotherapy    | 8             | 50.0% | 8          | 50.0% | 16     |
|                       | Total                         | 9             | 34.6% | 17         | 65.4% | 26     |
| Overall               | Without adjuvant chemotherapy | 23            | 57.5% | 17         | 42.5% | 40     |
|                       | With adjuvant chemotherapy    | 30            | 75.0% | 10         | 25.0% | 40     |
|                       | Total                         | 53            | 66.3% | 27         | 33.8% | 80     |

Chi-square test for 2x2 table without stratification (Overall):  $P = 0.098$

Odds ratio: 0.45 95% Confidence Interval 0.17-1.17

Mantel-Haenszel test for stratified analysis:  $P = 0.013$

Common odds ratio: 0.19 95% Confidence Interval 0.05-0.71

## Supplementary Discussion

### The controversy about the term “multivariate/univariate”

The term "multivariable/univariable analysis" instead of "multivariate/univariate analysis" is sometimes recommended for regression analyses by several authors and guidelines because "variate" means random variable in statistics terminology [12]. If we literally follow the definition, "multivariate analysis" may only cover non-regression type analyses for multiple random variables (e.g., principal component analysis and factor analysis) or regression analyses with multiple outcome variables (e.g., multivariate analysis of variance). However, in most situations described as “multivariate analysis”, medical researchers’ intentions are clear: adjust for multiple covariates as explanatory variables in regression models. In fact, we usually model the conditional expectation  $E(Y|X)$  by regression analysis in observational studies where the joint distribution  $(X, Y)$  is not controlled by researchers. We thus believe that “multivariate adjustment” or “multivariate analysis” is not necessarily misuse of the terminology. We therefore adopted "multivariate/univariate analysis" in this study as this usage is more common in today's medical literature [12].

STROBE Statement—Checklist of items that should be included in reports of *cross-sectional studies*

|                              | Item No | Recommendation                                                                                                                                                                                                                                                                                                                                                                                             |
|------------------------------|---------|------------------------------------------------------------------------------------------------------------------------------------------------------------------------------------------------------------------------------------------------------------------------------------------------------------------------------------------------------------------------------------------------------------|
| <b>Title and abstract</b>    | 1       | (a) Indicate the study's design with a commonly used term in the title or the abstract<br><b>p.1: "a cross-sectional study"</b><br>(b) Provide in the abstract an informative and balanced summary of what was done and what was found<br><b>p.2: See the abstract</b>                                                                                                                                     |
| <b>Introduction</b>          |         |                                                                                                                                                                                                                                                                                                                                                                                                            |
| Background/rationale         | 2       | Explain the scientific background and rationale for the investigation being reported<br><b>pp.3-4: See the 1st to 5th paragraphs in the introduction section</b>                                                                                                                                                                                                                                           |
| Objectives                   | 3       | State specific objectives, including any prespecified hypotheses<br><b>p.1 and p.4: See the abstract and the 6th and last paragraphs in the introduction section</b>                                                                                                                                                                                                                                       |
| <b>Methods</b>               |         |                                                                                                                                                                                                                                                                                                                                                                                                            |
| Study design                 | 4       | Present key elements of study design early in the paper<br><b>pp.4-6: See the materials and methods section (2.1. Selection of applicable journals and publications)</b>                                                                                                                                                                                                                                   |
| Setting                      | 5       | Describe the setting, locations, and relevant dates, including periods of recruitment, exposure, follow-up, and data collection<br><b>pp.4-6: See the materials and methods section (2.1. Selection of applicable journals and publications)</b>                                                                                                                                                           |
| Participants                 | 6       | (a) Give the eligibility criteria, and the sources and methods of selection of participants<br><b>pp.4-6: See the materials and methods section (2.1. Selection of applicable journals and publications)</b>                                                                                                                                                                                               |
| Variables                    | 7       | Clearly define all outcomes, exposures, predictors, potential confounders, and effect modifiers. Give diagnostic criteria, if applicable<br><b>pp.6-7: See the materials and methods section (2.2 Surveillance and 2.3. Outcomes)</b>                                                                                                                                                                      |
| Data sources/<br>measurement | 8*      | For each variable of interest, give sources of data and details of methods of assessment (measurement). Describe comparability of assessment methods if there is more than one group<br><b>pp.6-7: See the materials and methods section (2.2 Surveillance and 2.3. Outcomes)</b>                                                                                                                          |
| Bias                         | 9       | Describe any efforts to address potential sources of bias<br><b>pp.6-7: See the materials and methods section (2.2. Surveillance, 2.3. Outcomes and 2.4. Statistical analyses)</b>                                                                                                                                                                                                                         |
| Study size                   | 10      | Explain how the study size was arrived at<br><b>p.8: See the results section (3.1. Characteristics of investigated publications)</b>                                                                                                                                                                                                                                                                       |
| Quantitative variables       | 11      | Explain how quantitative variables were handled in the analyses. If applicable, describe which groupings were chosen and why<br><b>pp.6-7: See the materials and methods section (2.2. Surveillance, 2.3. Outcomes and 2.4 Statistical analyses)</b>                                                                                                                                                       |
| Statistical methods          | 12      | (a) Describe all statistical methods, including those used to control for confounding<br><b>pp.7-9: See Materials and methods section (2.4. Statistical analyses) and Results section (3.3. Subgroup analysis and 3.4. Further analysis for...)</b><br>(b) Describe any methods used to examine subgroups and interactions<br>See Materials and methods section (Statistical analyses) and Results section |

|                   |     |                                                                                                                                                                                                                                                                                                                                                                                                                                                                                                             |
|-------------------|-----|-------------------------------------------------------------------------------------------------------------------------------------------------------------------------------------------------------------------------------------------------------------------------------------------------------------------------------------------------------------------------------------------------------------------------------------------------------------------------------------------------------------|
|                   |     | (c) Explain how missing data were addressed<br>pp.6-7: See the materials and methods section (2.2. Surveillance, 2.3. Outcomes and 2.4 Statistical analyses)                                                                                                                                                                                                                                                                                                                                                |
|                   |     | (d) If applicable, describe analytical methods taking account of sampling strategy<br>pp.4-6: See the materials and methods section (2.1. Selection of applicable journals and publications)                                                                                                                                                                                                                                                                                                                |
|                   |     | (e) Describe any sensitivity analyses<br>pp.7-10: See Materials and methods section (2.4. Statistical analyses) and Results section (3.3. Subgroup analysis, 3.4. Further analysis for... and 3.5. Nation-level investigation)                                                                                                                                                                                                                                                                              |
| <b>Results</b>    |     |                                                                                                                                                                                                                                                                                                                                                                                                                                                                                                             |
| Participants      | 13* | (a) Report numbers of individuals at each stage of study—eg numbers potentially eligible, examined for eligibility, confirmed eligible, included in the study, completing follow-up, and analysed<br>p.8 and p.21 (figure): See Results section (3.1. Characteristics of investigated publications and 3.2. Descriptive statistics of the outcomes) and Figure 1<br>(b) Give reasons for non-participation at each stage<br>p. 21: See Figure 1<br>(c) Consider use of a flow diagram<br>p.21: See Figure 1 |
| Descriptive data  | 14* | (a) Give characteristics of study participants (eg demographic, clinical, social) and information on exposures and potential confounders<br>p.8: See Results section (3.1. Characteristics of investigated publications and 3.2. Descriptive statistics of the outcomes)<br>(b) Indicate number of participants with missing data for each variable of interest<br>p.21: See Figure 1                                                                                                                       |
| Outcome data      | 15* | Report numbers of outcome events or summary measures<br>p.8: See Results section (3.1. Characteristics of investigated publications and 3.2. Descriptive statistics of the outcomes)                                                                                                                                                                                                                                                                                                                        |
| Main results      | 16  | (a) Give unadjusted estimates and, if applicable, confounder-adjusted estimates and their precision (eg, 95% confidence interval). Make clear which confounders were adjusted for and why they were included<br>pp.16-20: See Tables<br>(b) Report category boundaries when continuous variables were categorized<br>pp.16-20: See Tables<br>(c) If relevant, consider translating estimates of relative risk into absolute risk for a meaningful time period<br>N/A                                        |
| Other analyses    | 17  | Report other analyses done—eg analyses of subgroups and interactions, and sensitivity analyses<br>pp.16-20: See Tables                                                                                                                                                                                                                                                                                                                                                                                      |
| <b>Discussion</b> |     |                                                                                                                                                                                                                                                                                                                                                                                                                                                                                                             |
| Key results       | 18  | Summarise key results with reference to study objectives<br>p.10: See the 1st paragraph in the discussion section                                                                                                                                                                                                                                                                                                                                                                                           |
| Limitations       | 19  | Discuss limitations of the study, taking into account sources of potential bias or imprecision. Discuss both direction and magnitude of any potential bias<br>p.12: See the discussion section (4.1. Limitations)                                                                                                                                                                                                                                                                                           |

|    |                          |    |                                                                                                      |
|----|--------------------------|----|------------------------------------------------------------------------------------------------------|
| 1  |                          |    |                                                                                                      |
| 2  | Interpretation           | 20 | Give a cautious overall interpretation of results considering objectives, limitations,               |
| 3  |                          |    | multiplicity of analyses, results from similar studies, and other relevant evidence                  |
| 4  |                          |    | <a href="#">p.13: See the discussion section (4.3. Conclusion)</a>                                   |
| 5  | Generalisability         | 21 | Discuss the generalisability (external validity) of the study results                                |
| 6  |                          |    | <a href="#">pp.10-13: See the whole discussion section (but in particular, intensively described</a> |
| 7  |                          |    | <a href="#">in the 6th and 7th paragraphs, 4.1. Limitations and 4.3. Conclusion)</a>                 |
| 8  | <hr/>                    |    |                                                                                                      |
| 9  | <b>Other information</b> |    |                                                                                                      |
| 10 | Funding                  | 22 | Give the source of funding and the role of the funders for the present study and, if                 |
| 11 |                          |    | applicable, for the original study on which the present article is based                             |
| 12 |                          |    | <a href="#">p.13: See Funding source section</a>                                                     |
| 13 | <hr/>                    |    |                                                                                                      |

14

15 \*Give information separately for exposed and unexposed groups.

16

17

18 **Note:** An Explanation and Elaboration article discusses each checklist item and gives methodological background and

19 published examples of transparent reporting. The STROBE checklist is best used in conjunction with this article (freely

20 available on the Web sites of PLoS Medicine at <http://www.plosmedicine.org/>, Annals of Internal Medicine at

21 <http://www.annals.org/>, and Epidemiology at <http://www.epidem.com/>). Information on the STROBE Initiative is

22 available at [www.strobe-statement.org](http://www.strobe-statement.org).

23

24

25

26

27

28

29

30

31

32

33

34

35

36

37

38

39

40

41

42

43

44

45

46

47

48

49

50

51

52

53

54

55

56

57

58

59

60

# BMJ Open

## A quantitative investigation of inappropriate regression model construction and the importance of medical statistics experts in observational medical research: a cross-sectional study

|                                 |                                                                                                                                                                                                                                                                                                                                                       |
|---------------------------------|-------------------------------------------------------------------------------------------------------------------------------------------------------------------------------------------------------------------------------------------------------------------------------------------------------------------------------------------------------|
| Journal:                        | <i>BMJ Open</i>                                                                                                                                                                                                                                                                                                                                       |
| Manuscript ID                   | bmjopen-2017-021129.R2                                                                                                                                                                                                                                                                                                                                |
| Article Type:                   | Research                                                                                                                                                                                                                                                                                                                                              |
| Date Submitted by the Author:   | 10-Apr-2018                                                                                                                                                                                                                                                                                                                                           |
| Complete List of Authors:       | Nojima, Masanori; the Institute of Medical Science, the University of Tokyo, Center for Translational Research<br>Tokunaga, Mutsumi; the Institute of Medical Science, the University of Tokyo, Center for Translational Research<br>Nagamura, Fumitaka; the Institute of Medical Science, the University of Tokyo, Center for Translational Research |
| <b>Primary Subject Heading</b>: | Medical publishing and peer review                                                                                                                                                                                                                                                                                                                    |
| Secondary Subject Heading:      | Epidemiology                                                                                                                                                                                                                                                                                                                                          |
| Keywords:                       | multivariate analysis, regression analysis, biostatistics, clinical research, observational research, medical statistics expert                                                                                                                                                                                                                       |
|                                 |                                                                                                                                                                                                                                                                                                                                                       |

SCHOLARONE™  
Manuscripts

Only

1  
2  
3  
4  
5 A quantitative investigation of inappropriate regression model construction and the  
6 importance of medical statistics experts in observational medical research: a  
7 cross-sectional study  
8  
9

10 Masanori Nojima<sup>1,2</sup>, Mutsumi Tokunaga<sup>1,3</sup>, and Fumitaka Nagamura<sup>1,2</sup>

11 1. Center for Translational Research, the Institute of Medical Science, the University of  
12 Tokyo  
13

14 2. The Division of Advanced Medicine Promotion, the Institute of Medical Science, the  
15 University of Tokyo  
16

17 3. Department of Health and Social Behavior, the University of Tokyo, School of Public  
18 Health  
19  
20

21  
22 **Corresponding Author**

23 Masanori Nojima

24 Center for Translational Research / The Division of Advanced Medicine Promotion, the  
25 Institute of Medical Science, the University of Tokyo  
26

27 TEL: +81-6409-2340

28 Email: nojima@ims.u-tokyo.ac.jp  
29  
30  
31  
32  
33  
34  
35  
36  
37  
38  
39  
40  
41  
42  
43  
44  
45  
46  
47  
48  
49  
50  
51  
52  
53  
54  
55  
56  
57  
58  
59  
60



## Abstract

Objective: To investigate under what circumstances inappropriate use of “multivariate analysis” is likely to occur and to identify the population that needs more support with medical statistics.

Study Design and Settings: The frequency of inappropriate regression model construction in multivariate analysis and related-factors were investigated in observational medical research publications.

Results: The inappropriate algorithm of using only variables that were significant in univariate analysis was estimated to occur at 6.4% (95%CI: 4.8-8.5%). This was observed in 1.1% of the publications with a medical statistics expert (hereinafter “expert”) as the first author, 3.5% if an expert was included as co-author, and in 12.2% if experts were not involved. In the publications where the number of cases was 50 or less and the study did not include experts, inappropriate algorithm usage was observed with a high proportion of 20.2%. The odds ratio of the involvement of experts for this outcome was 0.28 (95%CI: 0.15-0.53). A further, nation-level, analysis showed that the involvement of experts and the implementation of unfavorable multivariate analysis are associated at the nation-level analysis ( $R = -0.652$ ).

Conclusion: Based on the results of this study, the benefit of participation of medical statistics experts is obvious. Experts should be involved for proper confounding adjustment and interpretation of statistical models.

## Keywords

multivariate analysis; regression analysis; biostatistics; clinical research; observational research; medical statistics expert;

## Strengths and limitations of this study

### *Strengths*

- This is a unique research quantitatively investigating the frequency and the factors leading to inappropriate use of algorithms for variable selection in multivariate analysis.
- We also evaluated the quantitative efficacy of the involvement of medical statistics experts, and the importance of experts' participation in medical research became clear.
- The association between absence of experts and inappropriate multivariate analysis was remarkable in the nation-level investigation.

### ***Limitations***

- There are many possibilities for outcome misclassification due to complicated definitions, and the number of factors related to the quality of multivariate analysis are far more than those examined in this study.

### **1. Introduction**

In the medical research field, "multivariate analysis" (some claim that it should be called "multivariable analysis"; the usage of this term is discussed later), typified by logistic regression or Cox regression, is widely used as a means of controlling confounding in observational research and creating a prognostic prediction model [1]. As statistical analysis software became widely used, multivariate analysis also became familiar to many medical researchers and clinicians. Although multivariate analysis is easily executed using software, understanding the statistical assumptions that constitute the premise of multivariate analysis and interpretation of the statistical model are very difficult for researchers who do not specialize in biostatistics. Moreover, common misconceptions have been formed among medical researchers who are not specialized in statistics, which can interfere with correct understanding and interpretation of the results.

An American medical journal, "Annals of Internal Medicine" (<http://annals.org/aim/pages/AuthorInformationStatisticsOnly>) describes its representative example as general statistical guidance on their website.

"Approaches that select factors for inclusion in a multivariable model only if the factors are 'statistically significant' in 'bivariate screening' are not optimal. A factor can be a confounder even if it is not statistically significant by itself because it changes the effect of the exposure of interest when it is included in the model, or because it is a confounder only when included with other covariates. ... Better strategies than P value driven approaches for selecting variables are those that use external clinical judgment."

The problem with the algorithm in the first sentence of the previous quotation has already been pointed out many times [1-3]. In Kenneth J. Rothman's "Epidemiology: An Introduction" [4], the author said, "The two primary ones (purposes) being to make predictions and to control for confounding." This algorithm ignores the true associated factor whose apparent association is weakened by confounding in univariate analysis, which is not reasonable for any purpose. However, although it is just personal

1  
2  
3  
4  
5 experience as statistical consultants, we receive many questions like, "Only variables  
6 that were significant in univariate analysis are included in multivariate analysis,  
7 right?"  
8

9  
10  
11 Knowing in what situations such inappropriate analysis is being done should lead to  
12 improvement in the quality of statistical analysis in medical research. However, there  
13 are no reports that summarize how multivariate analysis is carried out, including  
14 whether medical statistical experts are involved or not.  
15

16  
17  
18 Based on the above situation, we decided to investigate under what circumstances  
19 inappropriate use is likely to occur and to identify the population that needs more  
20 support. Since inappropriate use of multivariate analysis (particularly in variable  
21 selection for regression model construction) is found even in published papers, we  
22 investigated its frequency and related factors in publications. Considering the feasibility,  
23 time constraints, and difficulty in the survey, we examined the following items as  
24 outcomes: 1) using only variables that were significant in univariate analysis, 2) using  
25 too many explanatory variables for few events. Additionally, as a desirable multivariate  
26 analysis method, we also investigated whether several models were fitted for the same  
27 outcome and sets of selected factors.  
28  
29  
30  
31

32  
33 Many other things should be considered in multivariate analysis such as association of  
34 events with variables, premises on distribution of variables, and correlation between  
35 explanatory variables. Therefore, knowledge of both medical science and biostatistics is  
36 necessary to enable appropriate understanding of statistical models. We therefore  
37 assessed the association between medical statistics expert involvement (such as  
38 biostatistician and epidemiologist) and the outcomes. Based on this research, we found  
39 a high-risk population in the implementation of multivariate analysis and suggest  
40 improvement measures.  
41  
42  
43  
44  
45

## 46 **2. Materials and methods**

### 47 **2.1. Selection of applicable journals and publications**

48  
49 This study was conducted as a cross-sectional study. Here, target publications in this  
50 study are about medical research undertaking multivariate analysis. To target  
51 publications with various qualities and properties, a multistep sampling method was  
52 applied as described below. Briefly, we first selected scientific journals dealing with  
53 clinical medicine and epidemiology and then we sampled individual publications. Also,  
54  
55  
56  
57  
58  
59

1  
2  
3  
4  
5 for "multivariate analysis," we chose logistic regression and Cox regression which are  
6 frequently performed in medical research. Details are as follows:  
7

- 8 1) Journals were selected from the journals listed in Thomson Reuter's Journal  
9 Citation Report. We first selected 45 medical research fields including 609 journals  
10 from the list in the website in 2014 ("JCR year" was 2013). Selected research fields  
11 were listed in Supplementary Table 1.  
12
- 13 2) With simple sampling, many journals with a small number of citations could be  
14 selected. Therefore, sampling was stratified by the impact factor which is an  
15 indicator directly reflecting citation frequency. The journals were classified into the  
16 following four layers according to the impact factor: "<2 (less than 2)," "2-<4 (two to  
17 less than 4)," "4-<6 (four to less than 6)," and "6< (more than 6)."  
18
- 19 3) Subsequently, we selected journals whose number of articles exceeds 200 / year to  
20 avoid journals with few articles and extracted all journals with impact factor of 6 or  
21 more (71 journals). The sampling rates of other strata were set to extract the same  
22 number ( $71 \times 4 = 284$  journals, listed in Supplementary Table 2). Sampling rates  
23 according to impact factor were: over 6: 100%, 4-6: < 55.5%, 2-4: < 27.8%, and under  
24 2: 45.8%. Journals selected for the investigation in this study are listed with this  
25 information in Supplementary Table 2.  
26
- 27 4) We searched for publications in which logistic regression / Cox regression was  
28 performed from selected journals in PubMed (within the past 5 years: 2011-2015).  
29 The search terms were "logistic + XXXX (journal name)" for logistic regression, and  
30 "hazard + XXXX (journal name)" for Cox regression, respectively. A publication  
31 database with 4086 (for logistic) and 11726 (for Cox) publications was constructed  
32 through the previously described process. Clinical trials were excluded when the  
33 word "random" or "trial" was included in the title or abstract. Meta-analysis was  
34 also excluded when the word "meta-analysis" was included in the title or abstract.  
35 All publications were from journals available through the University of Tokyo or  
36 open access articles.  
37
- 38 5) To set the 95% confidence interval to the range of  $\pm 3\%$ , the target number of  
39 publications was 1200. To limit selection bias from choosing journals with many  
40 publications with multivariate analysis, the sampling rate was calculated by  
41 applying a power function with an exponent < 1 to the number of publications (for  
42 logistic regression:  $0.34 \cdot N^{0.644}$ , for Cox regression:  $0.54 / N^{0.644}$ , N: the number of  
43 publications in each journal).  
44
- 45 6) Ineligible publications that could not be excluded by the above steps were excluded  
46 afterwards, and 571 papers (for logistic) and 541 (for Cox) were selected as the  
47  
48  
49  
50  
51  
52  
53  
54  
55  
56  
57  
58  
59  
60

1  
2  
3  
4  
5 research subject. This number satisfies the target confidence interval set above.  
6  
7

## 8 **2.2. Surveillance**

9 The following information was collected from sampled publications by research  
10 assistants with knowledge of statistical analysis: affiliation of authors, country of the  
11 first author, method of variable selection for multivariate analysis (the primary outcome  
12 described below), number of the events (for multivariate analysis, categorized as: <math>-20</math>,  
13 <math>21-50</math>, <math>51-100</math>, and <math>101-</math>), number of the covariates (categorized as: <math>-2</math>, <math>3-5</math>, <math>6-10</math>, <math>11-</math>), etc.  
14 We decided whether authors or co-authors have expertise in biostatistics or  
15 epidemiology based on their affiliation. When the affiliation includes the following  
16 terms or related terms: epidemiology, public health, prevention, nutrition, social health,  
17 community health, occupational health, environmental health, population, global  
18 health, nutrition, biostatistics, statistics, mathematics, and clinical research, the author  
19 was considered a medical statistics expert (hereinafter, sometimes simply referred to as  
20 “expert”) in this research. Affiliation and the outcomes were independently collected by  
21 different assistants to avoid affecting determination of their association. For  
22 outcome-specific (not research-specific) information such as the number of events and  
23 the number of covariates, basically the information on the primary endpoint was  
24 collected, and if not applicable, information on the multivariate analysis first appearing  
25 in the abstracts or results was collected.  
26  
27  
28  
29  
30  
31  
32

33 Since studies with few events (the number of events was 100 or less at the  
34 preliminary review) often included inappropriate analyses, the first author confirmed  
35 careful collection of information for such studies. In addition, the outcome of “Fitting  
36 several models for the same outcome and selected factors” was surveyed by the first  
37 author. In this surveillance, for the studies where the number of events exceeds 100,  
38 because the number is extremely large, validation was carried out by 30% sampling.  
39  
40  
41  
42

## 43 **2.3. Outcomes**

44 All outcomes were defined as surrogates for the quality of multivariate analysis. The  
45 following were considered as inappropriate/desirable algorithms.

- 46 1. “Using only variables that were significant in univariate analysis” is the primary  
47 outcome for this study, which means that all variables screened with statistical  
48 significance in univariate analyses were automatically entered without manual  
49 selection of variables and without consideration for the relevance of variables. This  
50 includes cases when it is written as such in the method section or it is obvious that it  
51 was implemented as such from expression of the tables. It is excluded from the  
52  
53  
54  
55  
56  
57  
58  
59  
60

1  
2  
3  
4  
5 event when variables were manually added or removed due to relevance to outcomes  
6 (such as a factor of interest or an established risk factor) or statistical consideration  
7 (such as multiple collinearity) after the screening in univariate analysis. However, it  
8 is not excluded when the stepwise method such as backward elimination method is  
9 only applied algorithmically for *post hoc* variable selection.  
10

- 11  
12 2. "Using too many explanatory variables for few events" is one of the secondary  
13 outcomes. This outcome was investigated only when the number of events for  
14 individual publication was equal to 50 or less and if the number of covariates was  
15 over 11 when the number of events was equal to 50 or less or the number of  
16 covariates was over 5 when the number of events was equal to 20 or less. The  
17 criterion was basically based on the study from Peduzzi et al. [5, 6], but because  
18 defining the exact number of events and covariates is sometimes very difficult, we  
19 relaxed that criterion; outcomes were taken only when the number of events is less  
20 than 50 and the number of covariates exceeds 20% of the number of events.  
21
- 22 3. "Fitting several models for the same outcome and selected factors" was determined  
23 as a desirable outcome for multivariate analysis. It was defined as the event only if  
24 tables were included for multiple models (because of screening efficiency). A  
25 representative example of this outcome was a fixed outcome and factors of interest  
26 related to various adjustment of covariates such as "adjustment for age," "age + sex,"  
27 "age + sex + other important factors," etc. Subgroup analysis and analysis on  
28 different outcomes are not included in this outcome.  
29  
30  
31  
32  
33  
34  
35

36 Of course, there are many other points to be considered in multivariate analysis, such  
37 as multiple collinearity and use of intermediate variables, but these were not included  
38 at this time because it is difficult to gather information from publications from various  
39 research areas.  
40  
41  
42

#### 43 **2.4. Statistical analyses**

44 Statistical analyses for binomial outcomes were performed using weighted generalized  
45 estimating equations (distribution = binomial, link = logit) with robust variance. Weight  
46 was basically defined as the inverse of the following formula: sampling rate stratified by  
47 impact factor \* sampling rate based on the number of each journal (investigated /  
48 published). The correlation coefficient weighted by the number of publications was  
49 calculated using a general linear model. All statistical analyses were performed using  
50 SPSS 23 (IBM).  
51  
52  
53  
54  
55  
56  
57  
58  
59  
60

## 2.5. Patient and Public involvement

Neither were involved.

## 3. Results

### 3.1. Characteristics of investigated publications

The flow chart of the selection of the research subjects is summarized in Figure 1. An outline of the investigated publications is shown in Table 1 (total number was 1112). Most of the studies were large-scale research that exceeded 100 events. Publication whose first author is an expert in medical statistics is estimated to be 33.5% of the total, and in the remaining 67.7%, the proportion of publications in which an expert was included in co-authors was estimated to be 37.8%.

### 3.2. Descriptive statistics of the outcomes

Descriptive statistics of the outcomes are summarized in Table 2. The primary outcome of our research, "Using only variables that were significant in univariate analysis" was estimated to occur in 6.4% (95%CI: 4.8-8.5%) of the overall publications. There was a big difference depending on whether an expert was the first author or not. It was observed in only 1.1% of the publications with the involvement of an expert as the first author, 12.2% if experts were not involved, and 3.5% if an expert was included as co-author. When an expert was included as the first author or co-author, it was 2.1%.

"Using too many explanatory variables for few events" was observed in 17.4% of the total, 19.0% if the first author is an expert, 22.1% if experts were not involved, and 11.5% if an expert was included as co-author. Since these are only for research with few events, the estimation accuracy was low. When an expert was included as the first author or co-author, it was 13.6%.

Regarding the preferred outcome, "Fitting several models for the same outcome and selected factors," like the primary outcome, the result greatly differed depending on whether the first author was an expert or not. If the first author is an expert, the preferred outcome was achieved 30.7% of the time. Otherwise, only 7.3% is achieved if the co-authorship did not contain experts, and 19.0% if an expert was included. In the case in which an expert was included as the first author or co-author, it was 26.2%. This outcome does not overlap with the algorithm "using only variables that are significant in univariate analysis" in which only one model was created for model selection. As can be seen from the above results, when the authors included an expert, preferable analysis was carried out more frequently.

### 3.3. Subgroup analysis

Subsequently, the association between the number of events and the impact factor in each publication and the outcomes were assessed. As shown in Table 3, unfavorable results are observed in publications with fewer events and in journals with lower impact factors, independently from involvement of experts. In particular, where the number of cases was 50 or less and the study did not include experts, inappropriate multivariate analysis was observed with a high proportion of 20.2%. At the same time, "fitting several models" was implemented at a low proportion of 2.1%. When the impact factor is under 2 in studies in which experts were not involved, similar results have been observed (30.6% for the former, and 4.0% for the latter).

### 3.4. Further analysis for the association between involvement of experts in medical statistics and the quality of multivariate analysis

We assessed the association between the involvement of experts and the outcomes by adjusting for the two factors stratified above (Table 4). As a result, the odds ratio of the involvement of experts for "using only variables that are significant in univariate analysis" was 0.28 (95%CI: 0.15-0.53) which can be interpreted to be a large risk reduction.

If an expert was involved as the first author in the publication, the paper is expected to be an epidemiological study, and there should be an influence due to the difference in research characteristics on the result. If the first author is not an expert, the research could be a non-epidemiological research such as clinical research, and we focused on how much improvement could be seen by involving an expert in these studies. As a result, even when an expert was involved only as a co-author, the risk decreased with an odds ratio of 0.42 (95%CI: 0.19-0.97). Likewise, for "Fitting several models for the same outcome and selected factors," the result was favorable when an expert was included (OR 3.51. 95% CI: 1.88-6.58 for as any type of author, OR 2.36 for only as co-author, 95% CI: 1.03 - 5.38).

### 3.5. Nation-level investigation

Finally, we examined how much medical statistics experts are involved as co-authors when the first author is not an expert and its association with "using only variables that are significant in univariate analysis" for each country (of the first author).

First of all, 45% of all papers are reports from the United States, accounting for an overwhelming majority compared to other countries (Table 5). As shown in Figure 2, the correlation coefficients (weighting the number of publications) of "Proportion of



1  
2  
3  
4  
5 publications with medical statistics experts as co-author within publications in which  
6 the first author is not an expert” with “proportion of publications with multivariate  
7 analysis using only variables that were significant in univariate analysis without  
8 manual selection of variables” showed an inverse correlation with  $R = -0.652$ . In this  
9 analysis, countries with more than 10 publications in which the first author is not an  
10 expert were used. North America and Northern Europe show relatively high expert  
11 involvement proportion, whereas East Asia has a low level of 20% or less except for  
12 Taiwan. For other European countries, there is variability in the result. The  
13 involvement of experts and the implementation of unfavorable multivariate analysis  
14 are associated at the nation-level analysis. The details are summarized in Table 5.  
15  
16  
17  
18  
19

#### 20 21 **4. Discussion**

22 In this study, we focused on the algorithm called "use only variables that were  
23 significant in univariate analysis" as the inappropriate outcome which is often  
24 implemented mechanically without considering the influence of confounding and the  
25 relationship between variables. The result of 6.4% for this outcome was less than our  
26 expectation. However, considering that those who consult with us are "clinicians who  
27 conduct small-scale observational research (in Japan)," which was detected as a risk  
28 factor in this research, the research results are consistent with the expectation.  
29  
30  
31  
32

33 The reason why they adopt these methods seems to be based on the following ideas.

- 34 - Regarding statistical significance as sacred: this has become a problem in recent  
35 years, a statement concerning abuse of P values from the American Statistical  
36 Association (ASA) was issued [7] in 2016.
- 37 - Placing emphasis on being statistically “independent”: some researchers think that  
38 inclusion of a factor is totally meaningless unless the factor of interest is associated  
39 with their outcome independently of any included variables.
- 40 - Thinking that not using significant variables in univariate analysis is considered  
41 arbitrary, and using non-significant variables in univariate analysis is also  
42 considered arbitrary.  
43  
44  
45  
46  
47  
48

49 Here, suppose adjuvant chemotherapy for a hypothetical cancer is performed frequently  
50 for cases with lymph node metastasis with strong association with recurrence. Although  
51 this adjuvant chemotherapy has the effect of preventing recurrence, univariate analysis  
52 shows weaker association than actual due to confounding by lymph node metastasis.  
53 However, with appropriate adjustment for lymph node metastasis, a significant inverse  
54  
55  
56  
57  
58  
59  
60

1  
2  
3  
4  
5 association was observed between the adjuvant chemotherapy with recurrence (example  
6 shown in Supplementary Table 3). If you apply an algorithm of using only variables that  
7 were significant in univariate analysis, the actual effect of adjuvant chemotherapy  
8 would be overlooked. Also, to investigate how confounding occurs in detail, it is  
9 necessary to create multiple models, and stratified analyses are very useful  
10 (Supplementary Table 4).  
11  
12  
13

14  
15 Variable selection for regression model construction is a critical problem in clinical  
16 studies with small sample sizes where it is unclear which factors should be adjusted. In  
17 such situations, variable selection dependent on P value in univariate analysis might be  
18 performed. Even though the number of covariates that can be entered at the same time  
19 is limited due to few events, a multifaceted approach such as fitting several models  
20 should be helpful for causal interpretation. This is what we studied as a desirable  
21 outcome in this paper. For example, adjustments are made in multiple steps, such as  
22 crude (no adjustment) for model 1, age + sex for model 2, age + sex + another important  
23 factor A for model 3, and age + sex + another important factor B for model 4. However,  
24 this step tended to be omitted in publications with fewer events (Table 3). Statistical  
25 multiplicity could be a problem with multiple models; however, we consider that it is not  
26 necessarily a severe problem because results from this approach are not independent  
27 and are highly correlated. Such sensitivity analysis with various statistical approaches  
28 is publicly recommended in clinical trials and analysis with missing data [8, 9].  
29  
30  
31  
32  
33  
34

35 Considering that multiple models are not created despite a small number of  
36 events and inappropriate analysis is often observed in a paper with a low impact factor,  
37 the reason why only significant variables are used is not caused only by the number of  
38 events, but by problems of the research system (including the absence of experts). In  
39 addition, the level of requirement from journals and the quality of peer review may be  
40 responsible.  
41  
42  
43

44 Since medical and social influence from research is very large, and fair research  
45 performance is required, participation of biostatisticians is essential in clinical trials.  
46 However, ideally, experts should always participate in research even in observational  
47 studies because of the difficulty of appropriate adjustment for confounding including  
48 multivariate analysis. Even observational research can seriously affect clinical practice  
49 guidelines.  
50  
51  
52

53  
54 Based on the results of this study, the benefit of participation of medical statistics  
55  
56  
57  
58  
59  
60

1  
2  
3  
4  
5 experts is obvious. Our results suggested that the proportion of experts' involvement is  
6 low in publications from East Asia, and there are relatively few publications in which  
7 the first author is an expert (Table 5). This would mean a shortage of such experts in  
8 these countries. The surveillance in 2011 by McKinsey Global Institute demonstrated  
9 that there are only a small number of graduates with statistical training (including  
10 biostatistics) in Japan and China (2.66 and 1.31 graduates per 100 people in 2008, while  
11 8.11, 13.58 and 12.47 for the United States, the United Kingdom, and France,  
12 respectively) [10]. The shortage of biostatisticians has been considered a problem in  
13 Japan, but infrastructure for training and developing biostatisticians has been  
14 developed rapidly in recent years [11].  
15  
16  
17  
18  
19  
20

21 However, it takes a long time to develop enough well-trained experts. In situations with  
22 a lack of medical statistics experts, it should be advisable to establish a system to  
23 disclose the data used for publication to enable the data to be analyzed (including  
24 multivariate analysis) by external experts as part of the peer review process. Here,  
25 "external" includes foreign experts or experts who are not acquainted personally with  
26 the research team. For new drug applications, researchers are obliged to submit the  
27 dataset of clinical trial standardized by the CDISC standard to regulatory authorities  
28 (Food and Drug Administration: FDA, Pharmaceuticals and Medical Devices Agency:  
29 PMDA, etc.) for further validation and additional analysis. Such standardization should  
30 be a model in constructing the system as described above.  
31  
32  
33  
34

35 Since clinicians performing clinical research are not necessarily full-time  
36 researchers and are usually very busy, they are the population that needs more support  
37 for medical statistics. In particular, those who are not involved in a huge research  
38 project (like a large epidemiological study) have difficulty accessing medical statistics  
39 experts. It is desirable to establish a support system for them within the peer review  
40 step regardless of the impact factor of the journal.  
41  
42  
43  
44

#### 45 **4.1. Limitations**

- 46 1) Large-scale research was dominant in the study papers; the number of small-scale  
47 research in which there are possibly many problems was limited. Although it may  
48 have been sampled according to the number of events, it is difficult to extract that  
49 information by search words.  
50
- 51 2) Since the definition of outcome is complicated, there are many possibilities of  
52 misclassification. Therefore, the reliability may be higher in the examination of the  
53 relative difference rather than absolute values.  
54  
55  
56  
57  
58  
59  
60

- 1  
2  
3  
4  
5 3) The number of factors related to the quality of multivariate analysis are far more  
6 than those examined in this study.  
7  
8 4) Even papers we classify under the undesirable outcome may not necessarily use an  
9 inappropriate form of multivariate analysis. For example, when the purpose of  
10 multivariate analysis is to construct a predictive model, there is no problem if a  
11 model with high predictive power is finally created. Our three outcomes should then  
12 be considered as “potentially inappropriate” / “desirable” use of multivariate  
13 analysis.  
14  
15  
16  
17

#### 18 **4.2. The controversy about the term “multivariate/univariate”**

19 The term "multivariable/univariable analysis" instead of "multivariate/univariate  
20 analysis" is sometimes recommended for regression analyses because "variate" means  
21 random variable [12]. However, in most situations described as “multivariate analysis”,  
22 medical researchers’ intentions are clear: adjust for multiple covariates as explanatory  
23 variables in regression models. We therefore adopted "multivariate/univariate analysis"  
24 in this study as this usage is more common in today's medical literature [12]. See the  
25 Supplementary Discussion for further details.  
26  
27  
28  
29

#### 30 **4.3. Conclusion**

31 In publications about observational research in which the number of events is 50 or less  
32 without the involvement of medical statistics experts, more than 20% of publications  
33 may have problems in multivariate analysis. The involvement of experts was associated  
34 with desirable implementation of multivariate analysis independently of the number of  
35 events and the impact factor. The benefit of participation of medical statistics experts in  
36 the study is obvious. Since even observational research can be a source of important  
37 evidence in medical science, experts should be involved for proper confounding  
38 adjustment and interpretation of statistical models. We hope that this research will  
39 make medical researchers more cognizant of appropriate regression model construction  
40 in multivariate analysis.  
41  
42  
43  
44  
45  
46

#### 47 **Funding source**

48 This study was supported by Grants-in-Aid for Scientific research (C), JSPS KAKENHI  
49 grant Number JP 26460764 (Fiscal-year 2014-16, Masanori Nojima).  
50  
51

#### 52 **Competing interests**

53 There are no competing interests.  
54  
55  
56  
57  
58  
59  
60

### Author's contributions

MN: Conception and design of the study, writing the manuscript, analysis and interpretation of data. MT: Acquisition and interpretation of data and critical revision of the manuscript. FN: Supervising the overall research and critical revision of the manuscript.

### Acknowledgements

We would like to thank a research assistant, Ms. Kasumi Okazaki, for collecting publications and detailed information. We would also like to thank a biostatistician, Dr. Tomohiro Shinozaki, for giving advanced statistical advice.

### Data sharing statement

No additional data are available.

### References

1. Bouwmeester W, Zuithoff NP, Mallett S, Geerlings MI, Vergouwe Y, Steyerberg EW, Altman DG, Moons KG: Reporting and methods in clinical prediction research: a systematic review. *PLoS Med* 2012;9:1-12
2. Sun GW, Shook TL, Kay GL: Inappropriate use of bivariable analysis to screen risk factors for use in multivariable analysis. *J Clin Epidemiol* 1996;49:907-16
3. Harrell FE Jr, Lee KL, Mark DB: Multivariable prognostic models: issues in developing models, evaluating assumptions and adequacy, and measuring and reducing errors. *Stat Med* 1996;15:361-87
4. Rothman KJ: *Epidemiology: An Introduction* / Kenneth J. Rothman. - 2nd ed. Oxford 2012
5. Peduzzi P, Concato J, Kemper E, Holford TR, Feinstein AR: A simulation study of the number of events per variable in logistic regression analysis. *J Clin Epidemiol* 1996;49:1373-9
6. Peduzzi P, Concato J, Feinstein AR, Holford TR: Importance of events per independent variable in proportional hazards regression analysis. II. Accuracy and precision of regression estimates. *J Clin Epidemiol* 1995;48:1503-10
7. Wasserstein RL, Lazar NA: The ASA's Statement on p-Values: Context, Process, and Purpose *Am Stat* 2016;70:129-33
8. International Conference on Harmonisation E9 Expert Working Group: ICH Harmonised Tripartite Guideline. Statistical principles for clinical trials. *Stat Med*

- 1  
2  
3  
4  
5 1999;18:1905-42  
6  
7 9. O'Neill RT, Temple R: The prevention and treatment of missing data in clinical  
8 trials: an FDA perspective on the importance of dealing with it. Clin Pharmacol  
9 Ther 2012;91:550-4  
10  
11 10. Manyika J, Chui M, Brown B, Bughin J, Dobbs R, Roxburgh C, Byers AH: Big data:  
12 The next frontier for innovation, competition, and productivity McKinsey Global  
13 Institute 2011  
14  
15 11. Carpenter J: How biostatistics is of rapidly growing importance in Japan Statistics  
16 Views 2013  
17  
18 12. Hidalgo B, Goodman M. Multivariate or multivariable regression? Am J Public  
19 Health. 2013;103:39-40  
20  
21

### 22 **Figure legends**

23 Figure 1. Summary of the selection of publications investigated in this study.

24 Figure 2. A scatter plot for the correlation between the proportion of publications using  
25 an inappropriate algorithm in multivariate analysis and the proportion of publications  
26 in which medical statistics experts were included as co-authors. Inappropriate use of  
27 multivariate analysis and presence of experts are inversely correlated.  
28  
29  
30  
31  
32  
33  
34  
35  
36  
37  
38  
39  
40  
41  
42  
43  
44  
45  
46  
47  
48  
49  
50  
51  
52  
53  
54  
55  
56  
57  
58  
59  
60

Table 1. Characteristics of publications investigated in this study.

|                                               |              | Number of publications<br>(N = 1112) | %     |       |
|-----------------------------------------------|--------------|--------------------------------------|-------|-------|
| The number of events                          | <21          | 47                                   | 4.2%  |       |
|                                               | 21-50        | 122                                  | 11.0% |       |
|                                               | 51-100       | 96                                   | 8.6%  |       |
|                                               | 100<         | 847                                  | 76.2% |       |
| Impact factor                                 | Under 2      | 127                                  | 11.4% |       |
|                                               | 2-4<         | 160                                  | 14.4% |       |
|                                               | 4-6<         | 397                                  | 35.7% |       |
|                                               | Over 6       | 428                                  | 38.5% |       |
| Medical statistics experts<br>are included as | First author | Co-author                            |       |       |
|                                               | No           | No                                   | 418   | 37.6% |
|                                               | No           | Yes                                  | 321   | 28.9% |
|                                               | Yes          | Either                               | 373   | 33.5% |

Table 2. Estimated proportions of publications using inappropriate/desirable algorithms in multivariate analysis stratified by whether medical statistics experts were included as author or not.

| Outcomes                                                            | Proportion | 95%CI |       |       |
|---------------------------------------------------------------------|------------|-------|-------|-------|
|                                                                     |            | Lower | Upper |       |
| 1. Using only significant variables in univariate analysis          | 6.4%       | 4.8%  | 8.5%  |       |
| Subgroup analysis                                                   |            |       |       |       |
| Medical statistics experts are included as                          |            |       |       |       |
| First author                                                        |            |       |       |       |
| Co-author                                                           |            |       |       |       |
| No                                                                  | No         | 12.2% | 8.7%  | 16.8% |
| No                                                                  | Yes        | 3.5%  | 2.0%  | 6.1%  |
| Yes                                                                 | Either     | 1.1%  | 0.3%  | 3.5%  |
| 1st author or co-author                                             | 2.1%       | 1.3%  | 3.6%  |       |
| 2. Using too many covariates for few events                         | 17.4%      | 10.2% | 28.0% |       |
| Subgroup analysis                                                   |            |       |       |       |
| Medical statistics experts are included as                          |            |       |       |       |
| First author                                                        |            |       |       |       |
| Co-author                                                           |            |       |       |       |
| No                                                                  | No         | 22.1% | 13.5% | 33.9% |
| No                                                                  | Yes        | 11.5% | 3.3%  | 33.1% |
| Yes                                                                 | Either     | 19.0% | 3.8%  | 58.5% |
| First author or co-author                                           | 13.6%      | 5.1%  | 31.5% |       |
| 3. Fitting several models for the same outcome and selected factors | 14.4%      | 11.1% | 18.3% |       |
| Subgroup analysis                                                   |            |       |       |       |
| Medical statistics experts are included as                          |            |       |       |       |
| First author                                                        |            |       |       |       |
| Co-author                                                           |            |       |       |       |
| No                                                                  | No         | 7.3%  | 4.6%  | 11.4% |
| No                                                                  | Yes        | 19.0% | 11.5% | 29.7% |
| Yes                                                                 | Either     | 30.7% | 23.0% | 39.7% |
| First author or co-author                                           | 26.2%      | 20.5% | 32.9% |       |



Table 3. Estimated proportions of publications using inappropriate/desirable algorithms in multivariate analysis stratified by the number of events, impact factor, and whether medical statistics experts were included as author or not.

| Subgroup                                                         |                       | Using only significant variables in univariate analysis |       |       | Fitting several models for the same outcome and selected factors |       |       |
|------------------------------------------------------------------|-----------------------|---------------------------------------------------------|-------|-------|------------------------------------------------------------------|-------|-------|
|                                                                  |                       | Proportion                                              | 95%CI |       | Proportion                                                       | 95%CI |       |
|                                                                  |                       |                                                         | Lower | Upper |                                                                  | Lower | Upper |
| Medical statistics experts included as first author or co-author | The number of events* |                                                         |       |       |                                                                  |       |       |
| No                                                               | <51                   | 20.2%                                                   | 12.5% | 31.1% | 2.1%                                                             | 0.7%  | 5.9%  |
|                                                                  | 51-100                | 9.4%                                                    | 3.2%  | 24.7% | 3.2%                                                             | 1.1%  | 8.6%  |
|                                                                  | 100<                  | 8.6%                                                    | 5.1%  | 14.2% | 10.7%                                                            | 6.3%  | 17.7% |
| Yes                                                              | <51                   | 7.7%                                                    | 2.9%  | 18.9% | 12.6%                                                            | 5.0%  | 28.2% |
|                                                                  | 51-100                | 4.0%                                                    | 1.2%  | 13.0% | 30.1%                                                            | 16.5% | 48.6% |
|                                                                  | 100<                  | 1.6%                                                    | 0.8%  | 3.2%  | 27.0%                                                            | 20.6% | 34.6% |
| Medical statistics experts included as first author or co-author | Impact factor         |                                                         |       |       |                                                                  |       |       |
| No                                                               | Under 2               | 30.6%                                                   | 17.1% | 48.4% | 4.0%                                                             | 1.1%  | 13.7% |
|                                                                  | 2-4<                  | 6.5%                                                    | 2.4%  | 16.3% | 3.4%                                                             | 0.8%  | 13.1% |
|                                                                  | 4-6<                  | 10.8%                                                   | 5.8%  | 19.2% | 11.7%                                                            | 6.1%  | 21.5% |
|                                                                  | Over 6                | 12.9%                                                   | 7.5%  | 21.1% | 9.0%                                                             | 4.2%  | 18.4% |
| Yes                                                              | Under 2               | 6.0%                                                    | 1.9%  | 17.2% | 16.2%                                                            | 5.4%  | 39.6% |
|                                                                  | 2-4<                  | 3.1%                                                    | 1.1%  | 8.6%  | 22.8%                                                            | 10.5% | 42.6% |
|                                                                  | 4-6<                  | 0.2%                                                    | 0.0%  | 1.1%  | 23.7%                                                            | 16.1% | 33.5% |
|                                                                  | Over 6                | 3.5%                                                    | 1.7%  | 6.9%  | 35.5%                                                            | 25.9% | 46.4% |

\*The category of "<21" has been integrated with the category "21 - 50" because of insufficient numbers

1  
2  
3  
4  
5  
6  
7  
8  
9  
10  
11  
12  
13  
14  
15  
16  
17  
18  
19  
20  
21  
22  
23  
24  
25  
26  
27  
28  
29  
30  
31  
32  
33  
34  
35  
36  
37  
38  
39  
40  
41  
42  
43  
44  
45  
46  
47

Table 4. The assessment of the association between the absence of medical statistics experts and the use of inappropriate/desirable algorithms in multivariate analysis with adjustment for potential confounders.

| Factor                                                                                                                    | Using only significant variables in univariate analysis |       |       | Fitting several models for the same outcome and selected factors |       |       |
|---------------------------------------------------------------------------------------------------------------------------|---------------------------------------------------------|-------|-------|------------------------------------------------------------------|-------|-------|
|                                                                                                                           | Odds ratio                                              | 95%CI |       | Odds ratio                                                       | 95%CI |       |
|                                                                                                                           |                                                         | Lower | Upper |                                                                  | Lower | Upper |
| Medical statistics experts included as first author or co-author (vs. no experts)                                         | 0.28                                                    | 0.15  | 0.53  | 3.51                                                             | 1.88  | 6.58  |
| Medical statistics experts included as first author or co-author (vs. no experts) when 1st author is clinicians or others | 0.42                                                    | 0.19  | 0.97  | 2.36                                                             | 1.03  | 5.38  |

All models were adjusted for impact factor and the number of events.

Table 5. Summary of each country and proportion of publications in which medical statistics experts were included as co-author within the publications in which the first author is not an expert in these fields.

| Country      | Total number of publications | Occupancy (%) | Publications in which the first author is NOT a medical statistics expert (%) | Estimates       |             |
|--------------|------------------------------|---------------|-------------------------------------------------------------------------------|-----------------|-------------|
|              |                              |               |                                                                               | Proportion* (%) | 95%CI*      |
| USA          | 501                          | 45.1          | 67.9                                                                          | 47.4            | (40-54.9)   |
| UK           | 63                           | 5.7           | 48.2                                                                          | 22.0            | (9.6-42.7)  |
| China        | 51                           | 4.6           | 84.5                                                                          | 6.7             | (2.5-17.1)  |
| Canada       | 48                           | 4.3           | 67.4                                                                          | 50.7            | (31.5-69.6) |
| Netherlands  | 46                           | 4.1           | 73.1                                                                          | 37.4            | (18.3-61.5) |
| Japan        | 45                           | 4.0           | 81.2                                                                          | 15.3            | (6.8-30.9)  |
| South Korea  | 39                           | 3.5           | 79.5                                                                          | 14.3            | (4.9-35.1)  |
| Sweden       | 38                           | 3.4           | 40.0                                                                          | 45.3            | (22.7-70)   |
| Taiwan       | 29                           | 2.6           | 91.3                                                                          | 38.8            | (19.1-62.9) |
| Germany      | 27                           | 2.4           | 80.1                                                                          | 41.7            | (21.9-64.6) |
| Denmark      | 26                           | 2.3           | 55.4                                                                          | 48.9            | (23.9-74.5) |
| Italy        | 25                           | 2.2           | 71.4                                                                          | 13.6            | (4.1-36.3)  |
| Australia    | 25                           | 2.2           | 42.5                                                                          | 50.6            | (16.4-84.3) |
| France       | 21                           | 1.9           | 57.5                                                                          | 77.7            | (46.5-93.3) |
| Spain        | 19                           | 1.7           | 62.6                                                                          | 32.7            | (11.8-63.8) |
| Brazil       | 13                           | 1.2           | 51.1                                                                          | 4.6             | (0.6-29.3)  |
| Norway       | 11                           | 1.0           | 48.4                                                                          | 44.8            | (9.7-86)    |
| Finland      | 8                            | 0.7           | 85.8                                                                          |                 |             |
| Switzerland  | 8                            | 0.7           | 39.6                                                                          |                 |             |
| Israel       | 7                            | 0.6           | 60.9                                                                          |                 |             |
| Singapore    | 6                            | 0.5           | 92.8                                                                          |                 |             |
| Belgium      | 6                            | 0.5           | 64.8                                                                          |                 |             |
| Turkey       | 5                            | 0.4           | 100                                                                           |                 |             |
| Austria      | 4                            | 0.4           | 100                                                                           |                 |             |
| South Africa | 4                            | 0.4           | 57.4                                                                          |                 |             |
| Kenya        | 4                            | 0.4           | 11.5                                                                          |                 |             |
| Poland       | 3                            | 0.3           | 100                                                                           |                 |             |
| India        | 3                            | 0.3           | 76.3                                                                          |                 |             |
| Thailand     | 3                            | 0.3           | 31.3                                                                          |                 |             |
| Iran         | 3                            | 0.3           | 34.2                                                                          |                 |             |
| Greece       | 2                            | 0.2           | 82.9                                                                          |                 |             |
| Ireland      | 2                            | 0.2           | 32.4                                                                          |                 |             |
| Others       | 17                           | 3.4           | 47.4                                                                          |                 |             |
| Overall      | 1112                         | 100           | 67.3                                                                          | 39.0            | (32.2-45.4) |

\*Calculated only for countries with publications more than 10.



28  
29  
30  
31  
32  
33  
34  
35  
36  
37  
38  
39  
40  
41  
42  
43  
44  
45  
46  
47  
48  
49  
50  
51  
52  
53  
54  
55  
56  
57  
58  
59  
60

**Figure 1.**

Summary of the selection of publications investigated in this study.

190x142mm (300 x 300 DPI)



**Figure 2.**

A scatter plot for the correlation between the proportion of publications using an inappropriate algorithm in multivariate analysis and the proportion of publications in which medical statistics experts were included as co-authors. Inappropriate use of multivariate analysis and presence of experts are inversely correlated.

254x338mm (300 x 300 DPI)

## Supplementary Table 1. Selected research filed in Thomson Reuter's Journal Citation Report (version 2014)

---

1 ALLERGY  
2  
3 ANESTHESIOLOGY  
4  
5 CARDIAC & CARDIOVASCULAR SYSTEMS  
6  
7 CLINICAL NEUROLOGY  
8  
9 CRITICAL CARE MEDICINE  
10  
11 DENTISTRY, ORAL SURGERY & MEDICINE  
12  
13 DERMATOLOGY  
14  
15 EMERGENCY MEDICINE  
16  
17 ENDOCRINOLOGY & METABOLISM  
18  
19 ENVIRONMENTAL SCIENCES  
20  
21 GASTROENTEROLOGY & HEPATOLOGY  
22  
23 GERIATRICS & GERONTOLOGY  
24  
25 HEALTH CARE SCIENCES & SERVICES  
26  
27 HEMATOLOGY  
28  
29 IMMUNOLOGY  
30  
31 INFECTIOUS DISEASES  
32  
33 INTEGRATIVE & COMPLEMENTARY MEDICINE  
34  
35 MEDICINE, GENERAL & INTERNAL  
36  
37 MEDICINE, RESEARCH & EXPERIMENTAL  
38  
39 NEUROSCIENCES  
40  
41 NURSING  
42  
43 NUTRITION & DIETETICS  
44  
45 OBSTETRICS & GYNECOLOGY  
46  
47 ONCOLOGY  
48  
49 OPHTHALMOLOGY  
50  
51 ORTHOPEDICS  
52  
53 OTORHINOLARYNGOLOGY  
54  
55 PATHOLOGY  
56  
57 PEDIATRICS  
58  
59 PERIPHERAL VASCULAR DISEASE  
60  
PHARMACOLOGY & PHARMACY  
PSYCHIATRY  
PUBLIC, ENVIRONMENTAL & OCCUPATIONAL HEALTH  
RADIOLOGY, NUCLEAR MEDICINE & MEDICAL IMAGING  
REHABILITATION  
REPRODUCTIVE BIOLOGY  
RESPIRATORY SYSTEM  
RHEUMATOLOGY  
SURGERY  
TOXICOLOGY  
TRANSPLANTATION  
TROPICAL MEDICINE  
UROLOGY & NEPHROLOGY  
VIROLOGY  
SUBSTANCE ABUSE

---

Supplementary Table 2. Journals selected for the investigation in this study.

| 2013 impact factor   |                      |                      |                      |
|----------------------|----------------------|----------------------|----------------------|
| Over 6               | 4-<6                 | 2-<4                 | Under 2              |
| NEW ENGL J MED       | ENVIRON MODELL SOFTW | TOXICON              | TURK GOGUS KALP DAMA |
| LANCET               | PEDIATRICS           | J NEUROL SCI         | RENAL FAILURE        |
| JAMA-J AM MED ASSOC  | PSYCHO-ONCOLOGY      | AM J NEURORADIOL     | ENVIRON MONIT ASSESS |
| J CLIN ONCOL         | EXP NEUROL           | PHYTOTHER RES        | ZH NEVROL PSIKHIATR  |
| BMJ-BRIT MED J       | ALIMENT PHARM THER   | INT J TUBERC LUNG D  | ANIM REPROD SCI      |
| NEURON               | PLOS NEGLECT TROP D  | J UROLOGY            | NEUROL SCI           |
| ENERG ENVIRON SCI    | AM J OBSTET GYNECOL  | AGR ECOSYST ENVIRON  | J EMERG MED          |
| J AM COLL CARDIOL    | AM J PATHOL          | EXP CELL RES         | ENVIRON TOXICOL PHAR |
| NAT NEUROSCI         | PAIN                 | DIABETES RES CLIN PR | BRAIN INJURY         |
| CIRCULATION          | INT J RADIAT ONCOL   | OBES SURG            | BMC PEDIATR          |
| EUR HEART J          | J AM MED INFORM ASSN | J VISION             | AM J MED SCI         |
| SCI TRANSL MED       | THROMB HAEMOSTASIS   | AM J INFECT CONTROL  | WATER SCI TECHNOL    |
| GASTROENTEROLOGY     | J THROMB HAEMOST     | ENVIRON TOXICOL CHEM | J STROKE CEREBROVASC |
| J EXP MED            | ARTHRIT CARE RES     | DRUG ALCOHOL DEPEN   | CLINICS              |
| J CLIN INVEST        | EUR J CANCER         | ECOL ECON            | PROG UROL            |
| AM J RESP CRIT CARE  | AM J RESP CELL MOL   | BMC NEUROL           | ENVIRON SCI-PROC IMP |
| J ALLERGY CLIN IMMUN | PSYCHOL MED          | VIRUS RES            | J VIROL METHODS      |
| HEPATOLOGY           | BRIT J PHARMACOL     | BIOL REPROD          | BURNS                |
| CIRC RES             | AM J EPIDEMIOL       | EUR J GASTROEN HEPAT | J NEUROSCI METH      |
| J HEPATOL            | RESUSCITATION        | APPL CATAL A-GEN     | J ORAL MAXIL SURG    |
| NEUROSCI BIOBEHAV R  | MOVEMENT DISORD      | BREAST               | PAK J MED SCI        |
| BRAIN                | BIOCHEM PHARMACOL    | J NEURO-ONCOL        | INT J ORAL MAX IMPL  |
| BLOOD                | NEUROBIOL AGING      | SPINE J              | ANN VASC SURG        |
| BIOL PSYCHIAT        | AM J KIDNEY DIS      | EUR J PHARM SCI      | KARDIOL POL          |
| CLIN INFECT DIS      | J TRANSL MED         | TRANSPLANTATION      | J CARDIOTHOR VASC AN |
| LEUKEMIA             | GASTROINTEST ENDOSC  | J PHARMACEUT BIOMED  | CHINESE MED J-PEKING |
| CANCER RES           | HAEMATOLOGICA        | BMC PREGNANCY CHILDB | RHEUMATOL INT        |
| ANN RHEUM DIS        | RHEUMATOLOGY         | AM J TROP MED HYG    | B ENVIRON CONTAM TOX |
| DIABETES CARE        | PROG NEURO-PSYCHOPH  | J ENVIRON MANAGE     | SUSTAINABILITY-BASEL |
| ONCOGENE             | CLIN J AM SOC NEPHRO | TOXICOL IN VITRO     | BONE JOINT J         |
| KIDNEY INT           | J AM COLL SURGEONS   | MAGN RESON IMAGING   | INT J CLIN EXP PATHO |
| DIABETES             | J THORAC CARDIOV SUR | CORNEA               | FOOT ANKLE INT       |
| CEREB CORTEX         | AM J SURG PATHOL     | CHEMOSPHERE          | EUR J OBSTET GYN R B |
| NEUROLOGY            | REMOTE SENS ENVIRON  | GEN COMP ENDOCR      | ENVIRON MANAGE       |
| GLOBAL CHANGE BIOL   | J NUTR               | CLIN ORAL IMPLAN RES | INT J GYNECOL CANCER |
| CLIN CANCER RES      | OBESITY              | BRIT J OPHTHALMOL    | SURG TODAY           |
| PLOS PATHOG          | EUR RADIOL           | TOXICOL APPL PHARM   | ONCOL LETT           |
| ARTHRITIS RHEUM-US   | J AM ACAD DERMATOL   | AM J CARDIOL         | INTERNAL MED         |
| NEUROPSYCHOPHARMACOL | INT J OBESITY        | CLIN VACCINE IMMUNOL | J DRUGS DERMATOL     |
| ANTIOXID REDOX SIGN  | PHARM RES-DORDR      | SLEEP MED            | SKELETAL RADIOL      |
| HYPERTENSION         | J PHYSIOL-LONDON     | CLIN EXP RHEUMATOL   | PHARM BIOL           |
| EMERG INFECT DIS     | BIOL CONSERV         | MOL VIS              | PEDIATR EMERG CARE   |
| BMC MED              | ARTERIOSCL THROM VAS | J AM HEART ASSOC     | PEDIATR CARDIOL      |
| J CONTROL RELEASE    | ENVIRON POLLUT       | FOOD CHEM TOXICOL    | EMERG MED J          |
| ANN SURG             | J NEUROCHEM          | EUR J PHARMACOL      | J CRANIOFAC SURG     |
| STEM CELLS           | ATHEROSCLEROSIS      | ACTA TROP            | AM J EMERG MED       |
| CHEST                | HUM REPROD           | SPINE                | ANTICANCER RES       |
| EUR RESPIR J         | AM HEART J           | FRONT HUM NEUROSCI   | ACTA NEUROCHIR       |
| ENVIRON HEALTH PERSP | BREAST CANCER RES TR | MAGN RESON MED       | PEDIATR RADIOL       |
| HUM BRAIN MAPP       | J CEREBR BLOOD F MET | NEUROSCIENCE         | HEPATO-GASTROENTEROL |
| AM J CLIN NUTR       | FERTIL STERIL        | CURR MED CHEM        | J CLIN NEUROSCI      |
| DIABETOLOGIA         | CAN J CARDIOL        | J SEX MED            | ACTA PAEDIATR        |
| J NEUROSCI           | RADIOTHER ONCOL      | NUTRIENTS            | INDIAN J SURG        |
| J BONE MINER RES     | J AM GERIATR SOC     | NEPHROL DIAL TRANSPL | RESP PHYSIOL NEUROBI |
| ANN ONCOL            | TOXICOL SCI          | FRONT NEURAL CIRCUIT | DEUT MED WOCHENSCHR  |
| AIDS                 | BONE                 | PRENATAL DIAG        | J MATERN-FETAL NEO M |
| CLIN GASTROENTEROL H | LIVER INT            | J GEN INTERN MED     | INT J MED SCI        |
| MOL THER             | ENVIRON RES LETT     | ARTHROSCOPY          | INT J ENDOCRINOL     |
| J INVEST DERMATOL    | BRIT J ANAESTH       | INT J ONCOL          | OTOL NEUROTOL        |
| J CLIN ENDOCR METAB  | INFECT IMMUN         | ENVIRON SCI POLLUT R | INT J PEDIATR OTORHI |
| RADIOLOGY            | HEALTH AFFAIR        | TRIALS               | TERAPEVT ARKH        |
| AM J TRANSPLANT      | CANCER-AM CANCER SOC | INVEST OPHTH VIS SCI | ANZ J SURG           |
| INT J CARDIOL        | OSTEOPOROSIS INT     | ARCH VIROL           | J KOREAN MED SCI     |
| OPHTHALMOLOGY        | CANCER EPIDEM BIOMAR | AM J ROENTGENOL      | OR SURG OR MED OR PA |
| ANESTHESIOLOGY       | PSYCHOPHARMACOLOGY   | UROL ONCOL-SEMIN ORI | J OBSTET GYNAECOL    |
| CRIT CARE MED        | ADDICTION            | AM J PHYSIOL-GASTR L | IRAN J PUBLIC HEALTH |
| NEUROIMAGE           | NEUROPHARMACOLOGY    | QUAL LIFE RES        | OTOLARYNG HEAD NECK  |
| MOL CANCER THER      | INT J CANCER         | COLORECTAL DIS       | J PAEDIATR CHILD H   |
| CORTEX               | J NUTR BIOCHEM       | VIROL J              | BMC COMPLEM ALTERN M |
| HEART                | MOL CELL ENDOCRINOL  | WASTE MANAGE         | BRIT J ORAL MAX SURG |
| STROKE               | MOL PHARMACOL        | EUR J CLIN PHARMACOL | J ENVIRON SCI-CHINA  |

Supplementary Table 3. Example of multivariate analysis: logistic regression analysis for recurrence after surgery of hypothetical cancer with potential prognostic factors.

Univariate Analysis

| Potential prognostic factors | P value | Odds ratio | 95% Confidence Interval |       |
|------------------------------|---------|------------|-------------------------|-------|
|                              |         |            | Lower                   | Upper |
| Adjuvant chemotherapy        | 0.101   | 0.45       | 0.17                    | 1.17  |
| Lymph node metastasis        | <0.001  | 8.31       | 2.88                    | 24.00 |
| Biomarker positive           | <0.001  | 17.11      | 5.38                    | 54.39 |

Multivariate Analysis

| Potential prognostic factors                            | P value | Odds ratio   | 95% Confidence Interval |       | P value                                    | Odds ratio   | 95% Confidence Interval |       |
|---------------------------------------------------------|---------|--------------|-------------------------|-------|--------------------------------------------|--------------|-------------------------|-------|
|                                                         |         |              | Lower                   | Upper |                                            |              | Lower                   | Upper |
| Multivariate analysis 1                                 |         |              |                         |       | Multivariate analysis 2                    |              |                         |       |
| Using only significant variables in univariate analysis |         |              |                         |       | Using all potential prognostic factors     |              |                         |       |
| Adjuvant chemotherapy                                   |         | Not included |                         |       | 0.015                                      | 0.14         | 0.03                    | 0.69  |
| Lymph node metastasis                                   | 0.005   | 6.08         | 1.72                    | 21.51 | 0.001                                      | 12.60        | 2.67                    | 59.42 |
| Biomarker positive                                      | <0.001  | 13.77        | 3.99                    | 47.48 | <0.001                                     | 16.05        | 4.11                    | 62.69 |
| Multivariate analysis 3                                 |         |              |                         |       | Multivariate analysis 4                    |              |                         |       |
| Adjuvant chemotherapy + Lymph node metastasis           |         |              |                         |       | Adjuvant chemotherapy + Biomarker positive |              |                         |       |
| Adjuvant chemotherapy                                   | 0.013   | 0.18         | 0.05                    | 0.70  | 0.093                                      | 0.35         | 0.10                    | 1.19  |
| Lymph node metastasis                                   | <0.001  | 15.63        | 4.03                    | 60.61 |                                            | Not included |                         |       |
| Biomarker positive                                      |         | Not included |                         |       | <0.001                                     | 18.92        | 5.61                    | 63.89 |

Inappropriate conclusion about adjuvant chemotherapy:  
With multivariate analysis 1, adjuvant chemotherapy has no effect.

Desirable conclusion about adjuvant chemotherapy:  
With multivariate analyses 2 to 4, adjuvant chemotherapy was inversely associated with recurrence after adjustment for lymph node metastasis.  
Lymph node metastasis was a stronger confounder for the association between adjuvant chemotherapy and recurrence than the biomarker.



Supplementary Table 4. Cross-tabulation table for the association between adjuvant chemotherapy and recurrence stratified by lymph node metastasis for hypothetical cancer.

| Lymph node metastasis |                               | No recurrence |       | recurrence |       | Total  |
|-----------------------|-------------------------------|---------------|-------|------------|-------|--------|
|                       |                               | Number        | %     | Number     | %     | Number |
| Absent                | Without adjuvant chemotherapy | 22            | 73.3% | 8          | 26.7% | 30     |
|                       | With adjuvant chemotherapy    | 22            | 91.7% | 2          | 8.3%  | 24     |
|                       | Total                         | 44            | 81.5% | 10         | 18.5% | 54     |
| Present               | Without adjuvant chemotherapy | 1             | 10.0% | 9          | 90.0% | 10     |
|                       | With adjuvant chemotherapy    | 8             | 50.0% | 8          | 50.0% | 16     |
|                       | Total                         | 9             | 34.6% | 17         | 65.4% | 26     |
| Overall               | Without adjuvant chemotherapy | 23            | 57.5% | 17         | 42.5% | 40     |
|                       | With adjuvant chemotherapy    | 30            | 75.0% | 10         | 25.0% | 40     |
|                       | Total                         | 53            | 66.3% | 27         | 33.8% | 80     |

Chi-square test for 2x2 table without stratification (Overall): P = 0.098

Odds ratio: 0.45 95% Confidence Interval 0.17-1.17

Mantel-Haenszel test for stratified analysis: P = 0.013

Common odds ratio: 0.19 95% Confidence Interval 0.05-0.71

## Supplementary Discussion

### The controversy about the term “multivariate/univariate”

The term "multivariable/univariable analysis" instead of "multivariate/univariate analysis" is sometimes recommended for regression analyses by several authors and guidelines because "variate" means random variable in statistics terminology [12]. If we literally follow the definition, "multivariate analysis" may only cover non-regression type analyses for multiple random variables (e.g., principal component analysis and factor analysis) or regression analyses with multiple outcome variables (e.g., multivariate analysis of variance). However, in most situations described as “multivariate analysis”, medical researchers’ intentions are clear: adjust for multiple covariates as explanatory variables in regression models. In fact, we usually model the conditional expectation  $E(Y|X)$  by regression analysis in observational studies where the joint distribution  $(X, Y)$  is not controlled by researchers. We thus believe that “multivariate adjustment” or “multivariate analysis” is not necessarily misuse of the terminology. We therefore adopted "multivariate/univariate analysis" in this study as this usage is more common in today's medical literature [12].

STROBE Statement—Checklist of items that should be included in reports of *cross-sectional studies*

|                              | Item No | Recommendation                                                                                                                                                                                                                                                                                                                                                                                             |
|------------------------------|---------|------------------------------------------------------------------------------------------------------------------------------------------------------------------------------------------------------------------------------------------------------------------------------------------------------------------------------------------------------------------------------------------------------------|
| <b>Title and abstract</b>    | 1       | (a) Indicate the study's design with a commonly used term in the title or the abstract<br><b>p.1: "a cross-sectional study"</b><br>(b) Provide in the abstract an informative and balanced summary of what was done and what was found<br><b>p.2: See the abstract</b>                                                                                                                                     |
| <b>Introduction</b>          |         |                                                                                                                                                                                                                                                                                                                                                                                                            |
| Background/rationale         | 2       | Explain the scientific background and rationale for the investigation being reported<br><b>pp.3-4: See the 1st to 5th paragraphs in the introduction section</b>                                                                                                                                                                                                                                           |
| Objectives                   | 3       | State specific objectives, including any prespecified hypotheses<br><b>p.1 and p.4: See the abstract and the 6th and last paragraphs in the introduction section</b>                                                                                                                                                                                                                                       |
| <b>Methods</b>               |         |                                                                                                                                                                                                                                                                                                                                                                                                            |
| Study design                 | 4       | Present key elements of study design early in the paper<br><b>pp.4-6: See the materials and methods section (2.1. Selection of applicable journals and publications)</b>                                                                                                                                                                                                                                   |
| Setting                      | 5       | Describe the setting, locations, and relevant dates, including periods of recruitment, exposure, follow-up, and data collection<br><b>pp.4-6: See the materials and methods section (2.1. Selection of applicable journals and publications)</b>                                                                                                                                                           |
| Participants                 | 6       | (a) Give the eligibility criteria, and the sources and methods of selection of participants<br><b>pp.4-6: See the materials and methods section (2.1. Selection of applicable journals and publications)</b>                                                                                                                                                                                               |
| Variables                    | 7       | Clearly define all outcomes, exposures, predictors, potential confounders, and effect modifiers. Give diagnostic criteria, if applicable<br><b>pp.6-7: See the materials and methods section (2.2 Surveillance and 2.3. Outcomes)</b>                                                                                                                                                                      |
| Data sources/<br>measurement | 8*      | For each variable of interest, give sources of data and details of methods of assessment (measurement). Describe comparability of assessment methods if there is more than one group<br><b>pp.6-7: See the materials and methods section (2.2 Surveillance and 2.3. Outcomes)</b>                                                                                                                          |
| Bias                         | 9       | Describe any efforts to address potential sources of bias<br><b>pp.6-7: See the materials and methods section (2.2. Surveillance, 2.3. Outcomes and 2.4. Statistical analyses)</b>                                                                                                                                                                                                                         |
| Study size                   | 10      | Explain how the study size was arrived at<br><b>p.8: See the results section (3.1. Characteristics of investigated publications)</b>                                                                                                                                                                                                                                                                       |
| Quantitative variables       | 11      | Explain how quantitative variables were handled in the analyses. If applicable, describe which groupings were chosen and why<br><b>pp.6-7: See the materials and methods section (2.2. Surveillance, 2.3. Outcomes and 2.4 Statistical analyses)</b>                                                                                                                                                       |
| Statistical methods          | 12      | (a) Describe all statistical methods, including those used to control for confounding<br><b>pp.7-9: See Materials and methods section (2.4. Statistical analyses) and Results section (3.3. Subgroup analysis and 3.4. Further analysis for...)</b><br>(b) Describe any methods used to examine subgroups and interactions<br>See Materials and methods section (Statistical analyses) and Results section |

|                   |     |                                                                                                                                                                                                                                                                                                                                                                                                                                                                                                             |
|-------------------|-----|-------------------------------------------------------------------------------------------------------------------------------------------------------------------------------------------------------------------------------------------------------------------------------------------------------------------------------------------------------------------------------------------------------------------------------------------------------------------------------------------------------------|
|                   |     | (c) Explain how missing data were addressed<br>pp.6-7: See the materials and methods section (2.2. Surveillance, 2.3. Outcomes and 2.4 Statistical analyses)                                                                                                                                                                                                                                                                                                                                                |
|                   |     | (d) If applicable, describe analytical methods taking account of sampling strategy<br>pp.4-6: See the materials and methods section (2.1. Selection of applicable journals and publications)                                                                                                                                                                                                                                                                                                                |
|                   |     | (e) Describe any sensitivity analyses<br>pp.7-10: See Materials and methods section (2.4. Statistical analyses) and Results section (3.3. Subgroup analysis, 3.4. Further analysis for... and 3.5. Nation-level investigation)                                                                                                                                                                                                                                                                              |
| <b>Results</b>    |     |                                                                                                                                                                                                                                                                                                                                                                                                                                                                                                             |
| Participants      | 13* | (a) Report numbers of individuals at each stage of study—eg numbers potentially eligible, examined for eligibility, confirmed eligible, included in the study, completing follow-up, and analysed<br>p.8 and p.21 (figure): See Results section (3.1. Characteristics of investigated publications and 3.2. Descriptive statistics of the outcomes) and Figure 1<br>(b) Give reasons for non-participation at each stage<br>p. 21: See Figure 1<br>(c) Consider use of a flow diagram<br>p.21: See Figure 1 |
| Descriptive data  | 14* | (a) Give characteristics of study participants (eg demographic, clinical, social) and information on exposures and potential confounders<br>p.8: See Results section (3.1. Characteristics of investigated publications and 3.2. Descriptive statistics of the outcomes)<br>(b) Indicate number of participants with missing data for each variable of interest<br>p.21: See Figure 1                                                                                                                       |
| Outcome data      | 15* | Report numbers of outcome events or summary measures<br>p.8: See Results section (3.1. Characteristics of investigated publications and 3.2. Descriptive statistics of the outcomes)                                                                                                                                                                                                                                                                                                                        |
| Main results      | 16  | (a) Give unadjusted estimates and, if applicable, confounder-adjusted estimates and their precision (eg, 95% confidence interval). Make clear which confounders were adjusted for and why they were included<br>pp.16-20: See Tables<br>(b) Report category boundaries when continuous variables were categorized<br>pp.16-20: See Tables<br>(c) If relevant, consider translating estimates of relative risk into absolute risk for a meaningful time period<br>N/A                                        |
| Other analyses    | 17  | Report other analyses done—eg analyses of subgroups and interactions, and sensitivity analyses<br>pp.16-20: See Tables                                                                                                                                                                                                                                                                                                                                                                                      |
| <b>Discussion</b> |     |                                                                                                                                                                                                                                                                                                                                                                                                                                                                                                             |
| Key results       | 18  | Summarise key results with reference to study objectives<br>p.10: See the 1st paragraph in the discussion section                                                                                                                                                                                                                                                                                                                                                                                           |
| Limitations       | 19  | Discuss limitations of the study, taking into account sources of potential bias or imprecision. Discuss both direction and magnitude of any potential bias<br>p.12: See the discussion section (4.1. Limitations)                                                                                                                                                                                                                                                                                           |

|                      |                          |    |                                                                                                                                                                                                                                           |
|----------------------|--------------------------|----|-------------------------------------------------------------------------------------------------------------------------------------------------------------------------------------------------------------------------------------------|
| 1<br>2<br>3<br>4     | Interpretation           | 20 | Give a cautious overall interpretation of results considering objectives, limitations, multiplicity of analyses, results from similar studies, and other relevant evidence<br><b>p.13: See the discussion section (4.3. Conclusion)</b>   |
| 5<br>6<br>7<br>8     | Generalisability         | 21 | Discuss the generalisability (external validity) of the study results<br><b>pp.10-13: See the whole discussion section (but in particular, intensively described in the 6th and 7th paragraphs, 4.1. Limitations and 4.3. Conclusion)</b> |
| 9                    | <b>Other information</b> |    |                                                                                                                                                                                                                                           |
| 10<br>11<br>12<br>13 | Funding                  | 22 | Give the source of funding and the role of the funders for the present study and, if applicable, for the original study on which the present article is based<br><b>p.13: See Funding source section</b>                                  |

14  
15 \*Give information separately for exposed and unexposed groups.

16  
17  
18 **Note:** An Explanation and Elaboration article discusses each checklist item and gives methodological background and  
19 published examples of transparent reporting. The STROBE checklist is best used in conjunction with this article (freely  
20 available on the Web sites of PLoS Medicine at <http://www.plosmedicine.org/>, Annals of Internal Medicine at  
21 <http://www.annals.org/>, and Epidemiology at <http://www.epidem.com/>). Information on the STROBE Initiative is  
22 available at [www.strobe-statement.org](http://www.strobe-statement.org).  
23  
24  
25  
26  
27  
28  
29  
30  
31  
32  
33  
34  
35  
36  
37  
38  
39  
40  
41  
42  
43  
44  
45  
46  
47  
48  
49  
50  
51  
52  
53  
54  
55  
56  
57  
58  
59  
60
