# Supplementary material for: Quantitative investigation of inappropriate regression model construction and the importance of medical statistics experts in observational medical research: a cross-sectional study
Source: PubMed Central journal article supplement — BMJ Open. 2018 May 5;8(5):e021129. doi: 10.1136/bmjopen-2017-021129 (PMC5942431; doi:10.1136/bmjopen-2017-021129), 2018-05-05
Supplement: bmjopen-2017-021129supp001.pdf [file bmjopen-2017-021129supp001.pdf]

---

ALLERGY  
ANESTHESIOLOGY  
CARDIAC & CARDIOVASCULAR SYSTEMS  
CLINICAL NEUROLOGY  
CRITICAL CARE MEDICINE  
DENTISTRY, ORAL SURGERY & MEDICINE  
DERMATOLOGY  
EMERGENCY MEDICINE  
ENDOCRINOLOGY & METABOLISM  
ENVIRONMENTAL SCIENCES  
GASTROENTEROLOGY & HEPATOLOGY  
GERIATRICS & GERONTOLOGY  
HEALTH CARE SCIENCES & SERVICES  
HEMATOLOGY  
IMMUNOLOGY  
INFECTIOUS DISEASES  
INTEGRATIVE & COMPLEMENTARY MEDICINE  
MEDICINE, GENERAL & INTERNAL  
MEDICINE, RESEARCH & EXPERIMENTAL  
NEUROSCIENCES  
NURSING  
NUTRITION & DIETETICS  
OBSTETRICS & GYNECOLOGY  
ONCOLOGY  
OPHTHALMOLOGY  
ORTHOPEDECS  
OTORHINOLARYNGOLOGY  
PATHOLOGY  
PEDIATRICS  
PERIPHERAL VASCULAR DISEASE  
PHARMACOLOGY & PHARMACY  
PSYCHIATRY  
PUBLIC, ENVIRONMENTAL & OCCUPATIONAL HEALTH  
RADIOLOGY, NUCLEAR MEDICINE & MEDICAL IMAGING  
REHABILITATION  
REPRODUCTIVE BIOLOGY  
RESPIRATORY SYSTEM  
RHEUMATOLOGY  
SURGERY  
TOXICOLOGY  
TRANSPLANTATION  
TROPICAL MEDICINE  
UROLOGY & NEPHROLOGY  
VIROLOGY  
SUBSTANCE ABUSE

---

Supplementary Table 2. Journals selected for the investigation in this study.

| 2013 impact factor<br>6 or over | 4-<6                 | 2-<4                 | Under 2              |
|---------------------------------|----------------------|----------------------|----------------------|
| NEW ENGL J MED                  | ENVIRON MODELL SOFTW | TOXICON              | TURK GOGUS KALP DAMA |
| LANCET                          | PEDIATRICS           | J NEUROL SCI         | RENAL FAILURE        |
| JAMA-J AM MED ASSOC             | PSYCHO-ONCOLOGY      | AM J NEURORADIOL     | ENVIRON MONIT ASSESS |
| J CLIN ONCOL                    | EXP NEUROL           | PHYTOTHER RES        | ZH NEVROL PSIKHIATR  |
| BMJ-BRIT MED J                  | ALIMENT PHARM THER   | INT J TUBERC LUNG D  | ANIM REPROD SCI      |
| NEURON                          | PLOS NEGLECT TROP D  | J UROLOGY            | NEUROL SCI           |
| ENERG ENVIRON SCI               | AM J OBSTET GYNECOL  | AGR ECOSYST ENVIRON  | J EMERG MED          |
| J AM COLL CARDIOL               | AM J PATHOL          | EXP CELL RES         | ENVIRON TOXICOL PHAR |
| NAT NEUROSCI                    | PAIN                 | DIABETES RES CLIN PR | BRAIN INJURY         |
| CIRCULATION                     | INT J RADIAT ONCOL   | OBES SURG            | BMC PEDIATR          |
| EUR HEART J                     | J AM MED INFORM ASSN | J VISION             | AM J MED SCI         |
| SCI TRANSL MED                  | THROMB HAEMOSTASIS   | AM J INFECT CONTROL  | WATER SCI TECHNOL    |
| GASTROENTEROLOGY                | J THROMB HAEMOST     | ENVIRON TOXICOL CHEM | J STROKE CEREBROVASC |
| J EXP MED                       | ARTHRIT CARE RES     | DRUG ALCOHOL DEPEN   | CLINICS              |
| J CLIN INVEST                   | EUR J CANCER         | ECOL ECON            | PROG UROL            |
| AM J RESP CRIT CARE             | AM J RESP CELL MOL   | BMC NEUROL           | ENVIRON SCI-PROC IMP |
| J ALLERGY CLIN IMMUN            | PSYCHOL MED          | VIRUS RES            | J VIROL METHODS      |
| HEPATOLOGY                      | BRIT J PHARMACOL     | BIOL REPROD          | BURNS                |
| CIRC RES                        | AM J EPIDEMIOL       | EUR J GASTROEN HEPAT | J NEUROSCI METH      |
| J HEPATOL                       | RESUSCITATION        | APPL CATAL A-GEN     | J ORAL MAXIL SURG    |
| NEUROSCI BIOBEHAV R             | MOVEMENT DISORD      | BREAST               | PAK J MED SCI        |
| BRAIN                           | BIOCHEM PHARMACOL    | J NEURO-ONCOL        | INT J ORAL MAX IMPL  |
| BLOOD                           | NEUROBIOL AGING      | SPINE J              | ANN VASC SURG        |
| BIOL PSYCHIAT                   | AM J KIDNEY DIS      | EUR J PHARM SCI      | KARDIOL POL          |
| CLIN INFECT DIS                 | J TRANSL MED         | TRANSPLANTATION      | J CARDIOTHOR VASC AN |
| LEUKEMIA                        | GASTROINTEST ENDOSC  | J PHARMACEUT BIOMED  | CHINESE MED J-PEKING |
| CANCER RES                      | HAEMATOLOGICA        | BMC PREGNANCY CHILDB | RHEUMATOL INT        |
| ANN RHEUM DIS                   | RHEUMATOLOGY         | AM J TROP MED HYG    | B ENVIRON CONTAM TOX |
| DIABETES CARE                   | PROG NEURO-PSYCHOPH  | J ENVIRON MANAGE     | SUSTAINABILITY-BASEL |
| ONCOGENE                        | CLIN J AM SOC NEPHRO | TOXICOL IN VITRO     | BONE JOINT J         |
| KIDNEY INT                      | J AM COLL SURGEONS   | MAGN RESON IMAGING   | INT J CLIN EXP PATHO |
| DIABETES                        | J THORAC CARDIOV SUR | CORNEA               | FOOT ANKLE INT       |
| CEREB CORTEX                    | AM J SURG PATHOL     | CHEMOSPHERE          | EUR J OBSTET GYN R B |
| NEUROLOGY                       | REMOTE SENS ENVIRON  | GEN COMP ENDOCR      | ENVIRON MANAGE       |
| GLOBAL CHANGE BIOL              | J NUTR               | CLIN ORAL IMPLAN RES | INT J GYNECOL CANCER |
| CLIN CANCER RES                 | OBESITY              | BRIT J OPHTHALMOL    | SURG TODAY           |
| PLOS PATHOG                     | EUR RADIOL           | TOXICOL APPL PHARM   | ONCOL LETT           |
| ARTHRITIS RHEUM-US              | J AM ACAD DERMATOL   | AM J CARDIOL         | INTERNAL MED         |
| NEUROPSYCHOPHARMACOL            | INT J OBESITY        | CLIN VACCINE IMMUNOL | J DRUGS DERMATOL     |
| ANTIOXID REDOX SIGN             | PHARM RES-DORDR      | SLEEP MED            | SKELETAL RADIOL      |
| HYPERTENSION                    | J PHYSIOL-LONDON     | CLIN EXP RHEUMATOL   | PHARM BIOL           |
| EMERG INFECT DIS                | BIOL CONSERV         | MOL VIS              | PEDIATR EMERG CARE   |
| BMC MED                         | ARTERIOSCL THROM VAS | J AM HEART ASSOC     | PEDIATR CARDIOL      |
| J CONTROL RELEASE               | ENVIRON POLLUT       | FOOD CHEM TOXICOL    | EMERG MED J          |
| ANN SURG                        | J NEUROCHEM          | EUR J PHARMACOL      | J CRANIOFAC SURG     |
| STEM CELLS                      | ATHEROSCLEROSIS      | ACTA TROP            | AM J EMERG MED       |
| CHEST                           | HUM REPROD           | SPINE                | ANTICANCER RES       |
| EUR RESPIR J                    | AM HEART J           | FRONT HUM NEUROSCI   | ACTA NEUROCHIR       |
| ENVIRON HEALTH PERSP            | BREAST CANCER RES TR | MAGN RESON MED       | PEDIATR RADIOL       |
| HUM BRAIN MAPP                  | J CEREBR BLOOD F MET | NEUROSCIENCE         | HEPATO-GASTROENTEROL |
| AM J CLIN NUTR                  | FERTIL STERIL        | CURR MED CHEM        | J CLIN NEUROSCI      |
| DIABETOLOGIA                    | CAN J CARDIOL        | J SEX MED            | ACTA PAEDIATR        |
| J NEUROSCI                      | RADIOTHER ONCOL      | NUTRIENTS            | INDIAN J SURG        |
| J BONE MINER RES                | J AM GERIATR SOC     | NEPHROL DIAL TRANSPL | RESP PHYSIOL NEUROBI |
| ANN ONCOL                       | TOXICOL SCI          | FRONT NEURAL CIRCUIT | DEUT MED WOCHENSCHR  |
| AIDS                            | BONE                 | PRENATAL DIAG        | J MATERN-FETAL NEO M |
| CLIN GASTROENTEROL H            | LIVER INT            | J GEN INTERN MED     | INT J MED SCI        |
| MOL THER                        | ENVIRON RES LETT     | ARTHROSCOPY          | INT J ENDOCRINOL     |
| J INVEST DERMATOL               | BRIT J ANAESTH       | INT J ONCOL          | OTOL NEUROTOL        |
| J CLIN ENDOCR METAB             | INFECT IMMUN         | ENVIRON SCI POLLUT R | INT J PEDIATR OTORHI |
| RADIOLOGY                       | HEALTH AFFAIR        | TRIALS               | TERAPEVT ARKH        |
| AM J TRANSPLANT                 | CANCER-AM CANCER SOC | INVEST OPHTH VIS SCI | ANZ J SURG           |
| INT J CARDIOL                   | OSTEOPOROSIS INT     | ARCH VIROL           | J KOREAN MED SCI     |
| OPHTHALMOLOGY                   | CANCER EPIDEM BIOMAR | AM J ROENTGENOL      | OR SURG OR MED OR PA |
| ANESTHESIOLOGY                  | PSYCHOPHARMACOLOGY   | UROL ONCOL-SEMIN ORI | J OBSTET GYNAECOL    |
| CRIT CARE MED                   | ADDICTION            | AM J PHYSIOL-GASTR L | IRAN J PUBLIC HEALTH |
| NEUROIMAGE                      | NEUROPHARMACOLOGY    | QUAL LIFE RES        | OTOLARYNG HEAD NECK  |
| MOL CANCER THER                 | INT J CANCER         | COLORECTAL DIS       | J PAEDIATR CHILD H   |
| CORTEX                          | J NUTR BIOCHEM       | VIROL J              | BMC COMPLEM ALTERN M |
| HEART                           | MOL CELL ENDOCRINOL  | WASTE MANAGE         | BRIT J ORAL MAX SURG |
| STROKE                          | MOL PHARMACOL        | EUR J CLIN PHARMACOL | J ENVIRON SCI-CHINA  |

Supplementary Table 3. Example of multivariate analysis: logistic regression analysis for recurrence after surgery of hypothetical cancer with potential prognostic factors.

Univariate Analysis

| Potential prognostic factors | P value | Odds ratio | 95% Confidence Interval |       |
|------------------------------|---------|------------|-------------------------|-------|
|                              |         |            | Lower                   | Upper |
| Adjuvant chemotherapy        | 0.101   | 0.45       | 0.17                    | 1.17  |
| Lymph node metastasis        | <0.001  | 8.31       | 2.88                    | 24.00 |
| Biomarker positive           | <0.001  | 17.11      | 5.38                    | 54.39 |

Multivariate Analysis

| Potential prognostic factors                            | P value | Odds ratio   | 95% Confidence Interval |       | P value                                    | Odds ratio   | 95% Confidence Interval |       |
|---------------------------------------------------------|---------|--------------|-------------------------|-------|--------------------------------------------|--------------|-------------------------|-------|
|                                                         |         |              | Lower                   | Upper |                                            |              | Lower                   | Upper |
| Multivariate analysis 1                                 |         |              |                         |       | Multivariate analysis 2                    |              |                         |       |
| Using only significant variables in univariate analysis |         |              |                         |       | Using all potential prognostic factors     |              |                         |       |
| Adjuvant chemotherapy                                   |         | Not included |                         |       | 0.015                                      | 0.14         | 0.03                    | 0.69  |
| Lymph node metastasis                                   | 0.005   | 6.08         | 1.72                    | 21.51 | 0.001                                      | 12.60        | 2.67                    | 59.42 |
| Biomarker positive                                      | <0.001  | 13.77        | 3.99                    | 47.48 | <0.001                                     | 16.05        | 4.11                    | 62.69 |
| Multivariate analysis 3                                 |         |              |                         |       | Multivariate analysis 4                    |              |                         |       |
| Adjuvant chemotherapy + Lymph node metastasis           |         |              |                         |       | Adjuvant chemotherapy + Biomarker positive |              |                         |       |
| Adjuvant chemotherapy                                   | 0.013   | 0.18         | 0.05                    | 0.70  | 0.093                                      | 0.35         | 0.10                    | 1.19  |
| Lymph node metastasis                                   | <0.001  | 15.63        | 4.03                    | 60.61 |                                            | Not included |                         |       |
| Biomarker positive                                      |         | Not included |                         |       | <0.001                                     | 18.92        | 5.61                    | 63.89 |

Inappropriate conclusion about adjuvant chemotherapy:

With multivariate analysis 1, adjuvant chemotherapy has no effect.

Desirable conclusion about adjuvant chemotherapy:

With multivariate analyses 2 to 4, adjuvant chemotherapy was inversely associated with recurrence after adjustment for lymph node metastasis.

Lymph node metastasis was a stronger confounder for the association between adjuvant chemotherapy and recurrence than the biomarker.

Supplementary Table 4. Cross-tabulation table for the association between adjuvant chemotherapy and recurrence stratified by lymph node metastasis for hypothetical cancer.

| Lymph node metastasis |                               | No recurrence |       | recurrence |       | Total  |
|-----------------------|-------------------------------|---------------|-------|------------|-------|--------|
|                       |                               | Number        | %     | Number     | %     | Number |
| Absent                | Without adjuvant chemotherapy | 22            | 73.3% | 8          | 26.7% | 30     |
|                       | With adjuvant chemotherapy    | 22            | 91.7% | 2          | 8.3%  | 24     |
|                       | Total                         | 44            | 81.5% | 10         | 18.5% | 54     |
| Present               | Without adjuvant chemotherapy | 1             | 10.0% | 9          | 90.0% | 10     |
|                       | With adjuvant chemotherapy    | 8             | 50.0% | 8          | 50.0% | 16     |
|                       | Total                         | 9             | 34.6% | 17         | 65.4% | 26     |
| Overall               | Without adjuvant chemotherapy | 23            | 57.5% | 17         | 42.5% | 40     |
|                       | With adjuvant chemotherapy    | 30            | 75.0% | 10         | 25.0% | 40     |
|                       | Total                         | 53            | 66.3% | 27         | 33.8% | 80     |

Chi-square test for 2x2 table without stratification (Overall):  $P = 0.098$

Odds ratio: 0.45 95% Confidence Interval 0.17-1.17

Mantel-Haenszel test for stratified analysis:  $P = 0.013$

Common odds ratio: 0.19 95% Confidence Interval 0.05-0.71
